# Supplementary material for: Comparative Analysis of OSEM Parameters for Cardiac SPECT Imaging Across Multiple Camera Brands: A Monte Carlo Study
Source: Preprints.org preprint supplement (doi:10.20944/preprints202407.2232.v1), 2024-07-30
Supplement: Supplementary file 2 [file supplementary]

## Sheet: SymbiaT2 (FH)
Frame	IMG	Correction(s)	Poission Noise	CAM	Filter	SU-IT	ROI	Mean	SD	Min	Max	Contrast (%)	CNR	SNR	NBR												BG ROI:	Freehand
8	antlathla	ACSC	Not Included	SymbiaT2	BW O3_0.5	2-4	MYO-Norm	0.0467541	0.0180932	0.0188466	0.0829287	26.0888	1.06933	15.1226	7.16406
							MYO-Def	0.0274065	0.00961482	0.0136864	0.0666114
							BG	0.00872431	0.00309168	0.00252555	0.0149736
	antlathla	ACSC	Not Included	SymbiaT2	BW O3_0.5	2-6	MYO-Norm	0.0640586	0.0249947	0.0218337	0.11361	28.0458	1.12269	18.6506	0.440414
							MYO-Def	0.0359972	0.0133451	0.0152267	0.0878568
							BG	0.0077987	0.00343466	0.00222324	0.0163844
	antlathla	ACSC	Not Included	SymbiaT2	BW O3_0.5	2-8	MYO-Norm	0.074091	0.0260572	0.023851	0.123302	28.2174	1.25152	21.2864	0.505152
							MYO-Def	0.0414799	0.0151523	0.0153741	0.0960759
							BG	0.00689036	0.00348068	0.00184584	0.0171278
	antlathla	ACSC	Not Included	SymbiaT2	BW O3_0.5	2-16	MYO-Norm	0.0957312	0.0246451	0.021306	0.144472	29.4213	1.76608	28.7493	0.680295
							MYO-Def	0.0522061	0.0189118	0.0130492	0.108685
							BG	0.00489473	0.00332986	0.000662084	0.0147062
	antlathla	ACSC	Not Included	SymbiaT2	BW O3_0.5	2-32	MYO-Norm	0.111525	0.0266077	0.0174218	0.16823	30.2853	1.94864	32.8753	0.928043
							MYO-Def	0.0596762	0.0222171	0.00820001	0.149194
							BG	0.00365539	0.00339236	-0.000166856	0.0140067
	antlathla	ACSC	Not Included	SymbiaT2	BW O3_0.5	4-4	MYO-Norm	0.0759697	0.0275074	0.0235923	0.129101	28.7254	1.2326	21.3192	0.50219
							MYO-Def	0.042064	0.0156354	0.0155961	0.100468
							BG	0.0070958	0.00356344	0.00190645	0.017459
	antlathla	ACSC	Not Included	SymbiaT2	BW O3_0.5	4-6	MYO-Norm	0.0892468	0.0264624	0.0236092	0.134488	29.1825	1.52374	25.5259	0.598191
							MYO-Def	0.0489249	0.0176981	0.0145427	0.108908
							BG	0.00584482	0.00349632	0.00125863	0.0166446
	antlathla	ACSC	Not Included	SymbiaT2	BW O3_0.5	4-8	MYO-Norm	0.0979096	0.0255856	0.0215594	0.147201	29.7894	1.75664	28.4193	0.679791
							MYO-Def	0.052965	0.0191288	0.0132165	0.113723
							BG	0.005068	0.00344518	0.000690255	0.0147747
	antlathla	ACSC	Not Included	SymbiaT2	BW O3_0.5	4-12	MYO-Norm	0.108187	0.0257292	0.0192913	0.16327	30.4313	1.96209	31.2594	0.820472
							MYO-Def	0.0577041	0.0210112	0.0105368	0.131436
							BG	0.00421823	0.00346094	0.000117087	0.0145924
	antlathla	ACSC	Not Included	SymbiaT2	BW O3_0.5	8-4	MYO-Norm	0.104154	0.0297169	0.0224977	0.155867	28.0682	1.5363	29.5753	0.66616
							MYO-Def	0.0585	0.0197039	0.0154162	0.128419
							BG	0.00528649	0.00352165	0.000777887	0.015826
	antlathla	ACSC	Not Included	SymbiaT2	BW O3_0.5	8-6	MYO-Norm	0.114736	0.0291428	0.0205602	0.172986	28.5346	1.74803	32.0906	0.825153												done
							MYO-Def	0.0637934	0.0208837	0.0120426	0.133221
							BG	0.00433299	0.00357538	0.000142589	0.0153116
	antlathla	ACSC	Not Included	SymbiaT2	BW O3_0.5	16-2	MYO-Norm	0.147671	0.0333927	0.0472132	0.244172	35.2375	2.30453	32.777	0.600583
							MYO-Def	0.0707166	0.0434975	0.0070182	0.208919
							BG	0.00750159	0.00450533	0.00135419	0.0219355
8	antlathla	ACSC	Included	SymbiaT2	BW O3_0.5	2-4	MYO-Norm	0.076523	0.0276221	0.0298032	0.131947	27.5505	1.19677	15.4258	0.396376
							MYO-Def	0.0434656	0.0141387	0.022783	0.099638
							BG	0.0125152	0.00496072	0.00356397	0.0242304
	antlathla	ACSC	Included	SymbiaT2	BW O3_0.5	2-6	MYO-Norm	0.0954665	0.0321916	0.0330099	0.157633	28.6499	1.32084	18.4129	0.46745
							MYO-Def	0.0529464	0.017846	0.0235924	0.121202
							BG	0.0110916	0.00518477	0.0032334	0.0270286
	antlathla	ACSC	Included	SymbiaT2	BW O3_0.5	2-8	MYO-Norm	0.107323	0.0321032	0.0292414	0.164204	29.3561	1.51735	20.9774	0.513297
							MYO-Def	0.0586112	0.0196712	0.0227628	0.130639
							BG	0.00996717	0.00511612	0.0026809	0.0274636
	antlathla	ACSC	Included	SymbiaT2	BW O3_0.5	2-16	MYO-Norm	0.135281	0.0312102	0.0215587	0.203329	32.0461	2.10387	27.6784	0.646608
							MYO-Def	0.0696187	0.0235621	0.0152414	0.144414
							BG	0.00755883	0.0048876	0.000806607	0.0229978
	antlathla	ACSC	Included	SymbiaT2	BW O3_0.5	2-32	MYO-Norm	0.155986	0.0369916	0.0159333	0.23597	32.9924	2.09218	28.6116	0.834235
							MYO-Def	0.0785928	0.0278546	0.00833399	0.189193
							BG	0.00653515	0.00545185	-0.000429747	0.0230086
	antlathla	ACSC	Included	SymbiaT2	BW O3_0.5	4-4	MYO-Norm	0.111375	0.034226	0.0301206	0.174887	29.093	1.46672	20.8187	0.514835
							MYO-Def	0.061175	0.0208638	0.0237868	0.139803
							BG	0.0103912	0.00534975	0.00283958	0.0282673
	antlathla	ACSC	Included	SymbiaT2	BW O3_0.5	4-6	MYO-Norm	0.128739	0.0322345	0.0252802	0.190954	30.6227	1.8726	24.7497	0.587647
							MYO-Def	0.0683768	0.0229398	0.0198632	0.150029
							BG	0.00885164	0.00520164	0.00169163	0.0263152
	antlathla	ACSC	Included	SymbiaT2	BW O3_0.5	4-8	MYO-Norm	0.140541	0.0319189	0.0223733	0.209211	31.7189	2.12058	27.089	0.652008
							MYO-Def	0.0728544	0.0244974	0.0160602	0.154798
							BG	0.00795714	0.00518812	0.000835049	0.0234523
	antlathla	ACSC	Included	SymbiaT2	BW O3_0.5	4-12	MYO-Norm	0.154547	0.0343503	0.0188523	0.227855	32.5763	2.21104	28.3898	0.76
							MYO-Def	0.0785972	0.0268872	0.011155	0.174694
							BG	0.00716284	0.00544376	-8.08957e-06	0.0231758
	antlathla	ACSC	Included	SymbiaT2	BW O3_0.5	8-4	MYO-Norm	0.145259	0.0348217	0.0226726	0.213439	27.9526	1.82262	28.4049	0.615026
							MYO-Def	0.0817923	0.0236928	0.0200925	0.170722
							BG	0.0083149	0.00511388	0.00105696	0.0232131
	antlathla	ACSC	Included	SymbiaT2	BW O3_0.5	8-6	MYO-Norm	0.159433	0.0357875	0.0192139	0.23435	28.6577	1.98465	27.5364	0.781625
							MYO-Def	0.0884075	0.025025	0.0153796	0.176186
							BG	0.00740753	0.00578991	2.01129e-05	0.0251245
	antlathla	ACSC	Included	SymbiaT2	BW O3_0.5	16-2	MYO-Norm	0.214343	0.0418645	0.050208	0.31354	39.4945	2.89917	32.8634	0.519374
							MYO-Def	0.0929709	0.0533516	0.0117617	0.265183
							BG	0.0125579	0.00652225	0.00183123	0.0294604
7	antlathla	ACSC	Not Included	SymbiaT2	None	2-4	MYO-Norm	0.0520072	0.0184456	0.0211456	0.0907299	27.3541	1.21118	16.9622	0.364381
							MYO-Def	0.0296662	0.00992821	0.0149834	0.0692558
							BG	0.00841446	0.00306607	0.0024092	0.0149845
	antlathla	ACSC	Not Included	SymbiaT2	None	2-6	MYO-Norm	0.071507	0.0246965	0.0258088	0.121728	29.6411	1.32402	21.9201	0.450124
							MYO-Def	0.0388083	0.0132501	0.0166747	0.089576
							BG	0.00724724	0.00326216	0.00210782	0.0143402
	antlathla	ACSC	Not Included	SymbiaT2	None	2-8	MYO-Norm	0.0828888	0.025041	0.0279857	0.132176	30.1059	1.5319	25.9603	0.514495
							MYO-Def	0.0445286	0.0148656	0.0161461	0.0968714
							BG	0.00620591	0.00319291	0.00171729	0.0140253
	antlathla	ACSC	Not Included	SymbiaT2	None	2-16	MYO-Norm	0.107185	0.0239305	0.0231004	0.161252	31.7498	2.15876	37.9445	0.701774
							MYO-Def	0.0555249	0.0190892	0.0111287	0.127574
							BG	0.0040252	0.00282478	0.00061887	0.0127059
	antlathla	ACSC	Not Included	SymbiaT2	None	2-32	MYO-Norm	0.124612	0.0293691	0.0189485	0.194445	32.7452	2.09328	46.8047	0.973857
							MYO-Def	0.0631342	0.0229517	0.00518825	0.178301
							BG	0.00273385	0.00266238	-0.000290937	0.0121336
	antlathla	ACSC	Not Included	SymbiaT2	None	4-4	MYO-Norm	0.0848887	0.0263563	0.0282958	0.138392	30.3856	1.50118	25.9626	0.512947
							MYO-Def	0.0453231	0.0154895	0.0164457	0.102128
							BG	0.00637425	0.00326965	0.00173622	0.014492
	antlathla	ACSC	Not Included	SymbiaT2	None	4-6	MYO-Norm	0.0999106	0.024858	0.0258599	0.147922	31.1929	1.91126	32.6197	0.613458
							MYO-Def	0.0524004	0.0177033	0.013893	0.109591
							BG	0.00499283	0.00306289	0.00113489	0.0137065
	antlathla	ACSC	Not Included	SymbiaT2	None	4-8	MYO-Norm	0.109546	0.0246094	0.0236516	0.164654	31.9447	2.15542	37.4533	0.703072
							MYO-Def	0.0565023	0.0193918	0.0113159	0.128243
							BG	0.00416013	0.00292487	0.000638172	0.0131842
	antlathla	ACSC	Not Included	SymbiaT2	None	4-12	MYO-Norm	0.120861	0.0267352	0.0211006	0.185507	32.6958	2.22776	43.0659	0.858839
							MYO-Def	0.0613015	0.0215965	0.00754893	0.158865
							BG	0.00326769	0.00280642	1.34297e-06	0.0127653
	antlathla	ACSC	Not Included	SymbiaT2	None	8-4	MYO-Norm	0.116482	0.0281984	0.0246115	0.17748	29.8831	1.9008	39.0776	0.683003
							MYO-Def	0.0628824	0.0200817	0.0132073	0.130417
							BG	0.00436424	0.00298079	0.000745628	0.014013
	antlathla	ACSC	Not Included	SymbiaT2	None	8-6	MYO-Norm	0.128176	0.0292085	0.0220834	0.199724	30.4707	2.04973	44.6921	0.852452
							MYO-Def	0.0683064	0.02176	0.00912921	0.161704
							BG	0.00336439	0.00286798	6.94492e-05	0.0131221
	antlathla	ACSC	Not Included	SymbiaT2	None	16-2	MYO-Norm	0.162912	0.034352	0.0453678	0.254275	35.5978	2.49001	41.5792	0.622796
							MYO-Def	0.0773751	0.0472822	0.00605058	0.22256
							BG	0.00629116	0.00391811	0.00117718	0.017033
7	antlathla	ACSC	Included	SymbiaT2	None	2-4	MYO-Norm	0.0846504	0.0283311	0.0353878	0.142403	29.3181	1.35479	17.4988	0.406315
							MYO-Def	0.0462677	0.0144778	0.0230988	0.104733
							BG	0.0119058	0.0048375	0.00363448	0.022051
	antlathla	ACSC	Included	SymbiaT2	None	2-6	MYO-Norm	0.105889	0.0319503	0.0355901	0.167655	30.7062	1.55717	21.9553	0.474759
							MYO-Def	0.056137	0.0177425	0.0226641	0.124591
							BG	0.0101587	0.00482293	0.00323271	0.0230247
	antlathla	ACSC	Included	SymbiaT2	None	2-8	MYO-Norm	0.119179	0.0311651	0.0316427	0.173118	31.5381	1.83377	26.0025	0.5177
							MYO-Def	0.0620294	0.0194977	0.0206735	0.132499
							BG	0.00885332	0.00458336	0.00250957	0.022193
	antlathla	ACSC	Included	SymbiaT2	None	2-16	MYO-Norm	0.149745	0.0311902	0.0233888	0.223677	34.2055	2.44731	36.9045	0.659971
							MYO-Def	0.0734128	0.0241077	0.0129691	0.150569
							BG	0.00614821	0.00405764	0.000450344	0.0176199
	antlathla	ACSC	Included	SymbiaT2	None	2-32	MYO-Norm	0.171839	0.0400173	0.0171916	0.263478	35.081	2.2304	39.2941	0.884757
							MYO-Def	0.0825846	0.0286842	0.00620745	0.202112
							BG	0.00494277	0.00437315	-0.000792451	0.0181079
	antlathla	ACSC	Included	SymbiaT2	None	4-4	MYO-Norm	0.124116	0.0331417	0.0329082	0.186544	31.2334	1.78262	25.7373	0.521012
							MYO-Def	0.065037	0.0207191	0.0219985	0.142704
							BG	0.00925588	0.00482242	0.00261677	0.0233424
	antlathla	ACSC	Included	SymbiaT2	None	4-6	MYO-Norm	0.143454	0.0310055	0.0277832	0.209369	32.8253	2.28682	32.2527	0.593614
							MYO-Def	0.0725501	0.0231549	0.0172973	0.151242
							BG	0.00749276	0.00444781	0.00121647	0.0202358
	antlathla	ACSC	Included	SymbiaT2	None	4-8	MYO-Norm	0.156281	0.0317349	0.0246461	0.230345	33.8875	2.49286	36.3056	0.664906
							MYO-Def	0.0771703	0.0250862	0.0136125	0.157713
							BG	0.006474	0.0043046	0.000451549	0.0188269
	antlathla	ACSC	Included	SymbiaT2	None	4-12	MYO-Norm	0.171312	0.0362606	0.020856	0.255655	34.688	2.43351	39.1045	0.791938
							MYO-Def	0.0830714	0.0278024	0.00890903	0.191448
							BG	0.00553185	0.00438088	-0.000417649	0.0188997
	antlathla	ACSC	Included	SymbiaT2	None	8-4	MYO-Norm	0.161591	0.0339854	0.0249518	0.240653	30.0236	2.19581	37.577	0.624039
							MYO-Def	0.0869654	0.0247488	0.017079	0.173886
							BG	0.00689101	0.00430026	0.000553501	0.0197532
	antlathla	ACSC	Included	SymbiaT2	None	8-6	MYO-Norm	0.176853	0.0366464	0.0210985	0.265717	30.6916	2.26664	37.4351	0.809073
							MYO-Def	0.0937887	0.0267004	0.0123563	0.195025
							BG	0.0058391	0.00472426	-0.000400057	0.0205942
	antlathla	ACSC	Included	SymbiaT2	None	16-2	MYO-Norm	0.23158	0.0464541	0.0562163	0.356179	39.4548	2.82081	42.0903	0.529959
							MYO-Def	0.100542	0.058232	0.0113101	0.26823
							BG	0.0103819	0.00550198	0.00197936	0.0288761
6	antlathla	ACSC	Not Included	SymbiaT2	None	2-4	MYO-Norm	0.0723121	0.0259031	0.0270568	0.131106	29.5649	1.27403	23.1206	0.389282
							MYO-Def	0.0393109	0.0131011	0.0205914	0.103626
							BG	0.00803427	0.0031276	0.00194384	0.0148974
	antlathla	ACSC	Not Included	SymbiaT2	None	2-6	MYO-Norm	0.0976485	0.031752	0.0359272	0.16521	31.1251	1.45999	32.5744	0.47046
							MYO-Def	0.051291	0.0169656	0.0223321	0.129231
							BG	0.00637187	0.00299771	0.00173843	0.0141452
	antlathla	ACSC	Not Included	SymbiaT2	None	2-8	MYO-Norm	0.111472	0.0306489	0.0353005	0.173088	31.2598	1.73235	41.0501	0.53273
							MYO-Def	0.0583774	0.0191062	0.0213056	0.134746
							BG	0.00509735	0.00271551	0.00146453	0.0129551
	antlathla	ACSC	Not Included	SymbiaT2	None	2-16	MYO-Norm	0.138101	0.029548	0.0305769	0.191239	32.2794	2.28104	67.0452	0.763388
							MYO-Def	0.0707009	0.0256087	0.0120867	0.172745
							BG	0.00269826	0.00205982	0.000374938	0.010371
	antlathla	ACSC	Not Included	SymbiaT2	None	2-32	MYO-Norm	0.155428	0.0373132	0.0241407	0.244153	32.8873	2.06178	93.9159	1.1518
							MYO-Def	0.0784965	0.0316296	0.00385667	0.214715
							BG	0.00143686	0.00165497	-0.00027224	0.00887791
	antlathla	ACSC	Not Included	SymbiaT2	None	4-4	MYO-Norm	0.114313	0.0321703	0.0369177	0.180816	31.5476	1.70433	40.8445	0.530652
							MYO-Def	0.0594841	0.0197336	0.0215123	0.141015
							BG	0.00527415	0.00279874	0.00149798	0.0132918
	antlathla	ACSC	Not Included	SymbiaT2	None	4-6	MYO-Norm	0.131321	0.0298603	0.0338815	0.192396	31.9714	2.13085	55.0206	0.646228
							MYO-Def	0.0676933	0.0231695	0.0164944	0.14989
							BG	0.00369337	0.00238676	0.000949515	0.0116604
	antlathla	ACSC	Not Included	SymbiaT2	None	4-8	MYO-Norm	0.141385	0.0303301	0.0321349	0.197103	32.4312	2.28314	65.9922	0.763147
							MYO-Def	0.0721372	0.0258222	0.0123446	0.171718
							BG	0.00280739	0.00214245	0.000402873	0.0106726
	antlathla	ACSC	Not Included	SymbiaT2	None	4-12	MYO-Norm	0.152692	0.0339553	0.0307258	0.222642	32.8524	2.22401	81.6098	0.979612
							MYO-Def	0.0771752	0.0293443	0.00704975	0.197766
							BG	0.00190994	0.001871	-0.000121226	0.00966516
	antlathla	ACSC	Not Included	SymbiaT2	None	8-4	MYO-Norm	0.151445	0.0340225	0.0342559	0.215754	30.8404	2.09844	69.0521	0.725344
							MYO-Def	0.0800507	0.0274605	0.0136382	0.182346
							BG	0.00302367	0.0021932	0.000455213	0.0115471
	antlathla	ACSC	Not Included	SymbiaT2	None	8-6	MYO-Norm	0.163187	0.0366749	0.03226	0.240667	31.0729	2.10968	85.4879	0.94973
							MYO-Def	0.0858148	0.030967	0.00818771	0.211151
							BG	0.00200993	0.00190889	-0.000129921	0.010414
	antlathla	ACSC	Not Included	SymbiaT2	None	16-2	MYO-Norm	0.202026	0.0460098	0.0711557	0.313774	36.2788	2.33782	72.9821	0.637352
							MYO-Def	0.0944633	0.0550173	0.00519636	0.280129
							BG	0.00434322	0.00276816	0.000897632	0.0141985
6	antlathla	ACSC	Included	SymbiaT2	None	2-4	MYO-Norm	0.112148	0.0372565	0.0426482	0.190457	31.352	1.43697	22.9518	0.430414
							MYO-Def	0.0586115	0.0183592	0.0306914	0.146218
							BG	0.0113524	0.00488623	0.00321055	0.0205101
	antlathla	ACSC	Included	SymbiaT2	None	2-6	MYO-Norm	0.138173	0.0390435	0.046883	0.214152	32.0851	1.71931	31.5133	0.486899
							MYO-Def	0.0710452	0.0219825	0.0303966	0.164007
							BG	0.00900516	0.0043846	0.00281092	0.0183516
	antlathla	ACSC	Included	SymbiaT2	None	2-8	MYO-Norm	0.153536	0.0368499	0.0439198	0.221025	32.5452	2.0461	39.8791	0.522112
							MYO-Def	0.0781374	0.0243305	0.0266621	0.170943
							BG	0.00737398	0.00385004	0.00225657	0.0166195
	antlathla	ACSC	Included	SymbiaT2	None	2-16	MYO-Norm	0.185415	0.0378701	0.0373427	0.251918	34.2451	2.49792	65.3671	0.675473
							MYO-Def	0.0908185	0.0316372	0.0140981	0.213431
							BG	0.00419931	0.00283652	0.000315753	0.0133252
	antlathla	ACSC	Included	SymbiaT2	None	2-32	MYO-Norm	0.206705	0.0483282	0.0348248	0.316417	34.713	2.20426	78.162	0.982962
							MYO-Def	0.100177	0.0390472	0.00436771	0.260282
							BG	0.00269041	0.00264457	-0.000541213	0.0124286
	antlathla	ACSC	Included	SymbiaT2	None	4-4	MYO-Norm	0.161115	0.0386959	0.0462406	0.236085	32.4004	2.0378	39.4874	0.526744
							MYO-Def	0.0822604	0.0262251	0.0293855	0.185531
							BG	0.007746	0.00408016	0.00235915	0.0174809
	antlathla	ACSC	Included	SymbiaT2	None	4-6	MYO-Norm	0.182191	0.0369821	0.0417935	0.24454	33.4068	2.4673	54.239	0.598328
							MYO-Def	0.0909451	0.0299621	0.0214847	0.191884
							BG	0.00561404	0.00335904	0.00113917	0.0153363
	antlathla	ACSC	Included	SymbiaT2	None	4-8	MYO-Norm	0.195061	0.0389636	0.039177	0.262736	34.0029	2.54064	64.8819	0.68091
							MYO-Def	0.0960685	0.0330217	0.0157085	0.218066
							BG	0.00441527	0.0030064	0.000330119	0.01414
	antlathla	ACSC	Included	SymbiaT2	None	4-12	MYO-Norm	0.209544	0.0447361	0.0365858	0.304924	34.3493	2.39514	75.8769	0.847433
							MYO-Def	0.102395	0.0373728	0.00869063	0.24826
							BG	0.00325882	0.00276163	-0.00037511	0.013157
	antlathla	ACSC	Included	SymbiaT2	None	8-4	MYO-Norm	0.20483	0.0410511	0.0406315	0.278817	31.5467	2.39316	66.7553	0.6223
							MYO-Def	0.106588	0.0347275	0.0191997	0.228262
							BG	0.00493069	0.00306837	0.000324197	0.0148527
	antlathla	ACSC	Included	SymbiaT2	None	8-6	MYO-Norm	0.219487	0.0455698	0.0391725	0.324342	31.7149	2.31947	72.7149	0.839929
							MYO-Def	0.113789	0.0389056	0.0116947	0.260228
							BG	0.00359371	0.00301846	-0.000456292	0.0141531
	antlathla	ACSC	Included	SymbiaT2	None	16-2	MYO-Norm	0.276262	0.0587169	0.0814346	0.429081	40.4141	2.70839	81.9686	0.48842
							MYO-Def	0.117234	0.0680296	0.0107231	0.330016
							BG	0.0069005	0.00337034	0.00121795	0.0165094
5	antlathla	ACSC	Not Included	SymbiaT2	BW O3_0.5	2-4	MYO-Norm	0.0815697	0.0300159	0.026585	0.1601	28.6342	1.20986	22.0845	0.410075
							MYO-Def	0.0452546	0.0155069	0.0225955	0.124452
							BG	0.00900697	0.00369353	0.00241426	0.0167894
	antlathla	ACSC	Not Included	SymbiaT2	BW O3_0.5	2-6	MYO-Norm	0.109221	0.0359559	0.0322836	0.199888	30.2651	1.4115	31.5219	0.487008
							MYO-Def	0.0584694	0.0196038	0.0240447	0.153132
							BG	0.00711471	0.00346492	0.00202983	0.0166428
	antlathla	ACSC	Not Included	SymbiaT2	BW O3_0.5	2-8	MYO-Norm	0.12394	0.0348064	0.0323461	0.207598	30.6116	1.66912	40.0766	0.548811
							MYO-Def	0.0658441	0.0217397	0.0216682	0.158974
							BG	0.00563505	0.00309258	0.00160629	0.0154862
	antlathla	ACSC	Not Included	SymbiaT2	BW O3_0.5	2-16	MYO-Norm	0.151217	0.0342207	0.0250335	0.215668	31.9457	2.13973	67.8462	0.787708
							MYO-Def	0.077994	0.02818	0.0114897	0.178102
							BG	0.0028295	0.00222882	0.000170614	0.010563
	antlathla	ACSC	Not Included	SymbiaT2	BW O3_0.5	2-32	MYO-Norm	0.168441	0.0417882	0.0199651	0.251953	32.6537	1.98444	103.218	1.20436
							MYO-Def	0.0855149	0.034242	0.00228526	0.223968
							BG	0.00135498	0.00163189	-0.00112213	0.00839424
	antlathla	ACSC	Not Included	SymbiaT2	BW O3_0.5	4-4	MYO-Norm	0.126843	0.0363326	0.0336218	0.213983	30.6812	1.6393	39.6765	0.547184
							MYO-Def	0.0672829	0.0224083	0.0221348	0.165677
							BG	0.00584251	0.00319693	0.00169029	0.01581
	antlathla	ACSC	Not Included	SymbiaT2	BW O3_0.5	4-6	MYO-Norm	0.144407	0.0344433	0.0290727	0.219527	31.3474	2.00121	54.3143	0.666143
							MYO-Def	0.0754786	0.0258262	0.0163002	0.168455
							BG	0.00399123	0.00265873	0.000739636	0.0128993
	antlathla	ACSC	Not Included	SymbiaT2	BW O3_0.5	4-8	MYO-Norm	0.154552	0.0351125	0.0261181	0.221959	31.8893	2.12852	66.3487	0.788245
							MYO-Def	0.0798143	0.0284577	0.0117918	0.177082
							BG	0.00295516	0.00232939	0.000181431	0.0109543
	antlathla	ACSC	Not Included	SymbiaT2	BW O3_0.5	4-12	MYO-Norm	0.165822	0.038695	0.0227026	0.22977	32.3761	2.0962	85.4317	1.01655
							MYO-Def	0.0847096	0.0320116	0.00604494	0.204763
							BG	0.00190939	0.00194099	-0.000313768	0.00943062
	antlathla	ACSC	Not Included	SymbiaT2	BW O3_0.5	8-4	MYO-Norm	0.165973	0.0393306	0.027727	0.244255	30.4829	1.97169	68.6971	0.766289
							MYO-Def	0.0884251	0.0309655	0.0128952	0.189766
							BG	0.00315287	0.00241601	0.0001781	0.0120752
	antlathla	ACSC	Not Included	SymbiaT2	BW O3_0.5	8-6	MYO-Norm	0.177661	0.0422098	0.0244517	0.250241	30.7666	1.98058	89.8194	1.01065
							MYO-Def	0.0940612	0.0346414	0.0070043	0.21729
							BG	0.00195714	0.00197798	-0.000535824	0.00994424
	antlathla	ACSC	Not Included	SymbiaT2	BW O3_0.5	16-2	MYO-Norm	0.2152	0.0525899	0.0522267	0.34162	35.5262	2.14534	75.0383	0.676629
							MYO-Def	0.102377	0.0568006	0.00459915	0.282591
							BG	0.00423847	0.00286787	0.00019035	0.0162248
5	antlathla	ACSC	Included	SymbiaT2	BW O3_0.5	2-4	MYO-Norm	0.125923	0.0429557	0.042909	0.226165	30.8827	1.3834	22.2875	0.453705
							MYO-Def	0.0664982	0.021453	0.031643	0.178338
							BG	0.0124529	0.00564994	0.00349699	0.0250285
	antlathla	ACSC	Included	SymbiaT2	BW O3_0.5	2-6	MYO-Norm	0.154007	0.0445367	0.0438177	0.249495	31.6587	1.66301	30.3645	0.520812
							MYO-Def	0.0799419	0.0251899	0.0294013	0.199605
							BG	0.00973852	0.00507194	0.00280933	0.0231394
	antlathla	ACSC	Included	SymbiaT2	BW O3_0.5	2-8	MYO-Norm	0.170204	0.0425528	0.0401955	0.255125	32.2406	1.95034	38.3827	0.566946
							MYO-Def	0.0872117	0.0275842	0.0249535	0.203344
							BG	0.00782154	0.00443439	0.00224828	0.0210218
	antlathla	ACSC	Included	SymbiaT2	BW O3_0.5	2-16	MYO-Norm	0.202536	0.0445286	0.0326843	0.276112	34.1267	2.31458	66.0581	0.750845
							MYO-Def	0.099471	0.0348989	0.0117532	0.226717
							BG	0.00408344	0.00306603	6.03722e-05	0.0158188
	antlathla	ACSC	Included	SymbiaT2	BW O3_0.5	2-32	MYO-Norm	0.223447	0.0551251	0.0298779	0.330229	34.7979	2.09279	93.8537	1.10156
							MYO-Def	0.108082	0.0423348	0.00187303	0.276697
							BG	0.0021613	0.0023808	-0.000774102	0.014325
	antlathla	ACSC	Included	SymbiaT2	BW O3_0.5	4-4	MYO-Norm	0.179062	0.0447765	0.042267	0.269444	32.217	1.94886	37.7698	0.571144
							MYO-Def	0.0917988	0.0295648	0.0274182	0.218442
							BG	0.00830068	0.00474088	0.00233818	0.0224568
	antlathla	ACSC	Included	SymbiaT2	BW O3_0.5	4-6	MYO-Norm	0.200542	0.0438891	0.036935	0.274068	33.2164	2.27863	52.729	0.659088
							MYO-Def	0.100535	0.0334025	0.0188396	0.220388
							BG	0.00577049	0.00380326	0.000828439	0.018361
	antlathla	ACSC	Included	SymbiaT2	BW O3_0.5	4-8	MYO-Norm	0.213326	0.0461588	0.0338738	0.288416	33.797	2.33481	64.8922	0.756207
							MYO-Def	0.105554	0.0364743	0.0129203	0.232293
							BG	0.00434721	0.00328739	6.39219e-05	0.0164
	antlathla	ACSC	Included	SymbiaT2	BW O3_0.5	4-12	MYO-Norm	0.227522	0.0519438	0.0308462	0.321626	34.179	2.23149	81.5266	0.951098
							MYO-Def	0.11161	0.0408597	0.00580105	0.265246
							BG	0.00293426	0.00279077	-0.000591889	0.0151238
	antlathla	ACSC	Included	SymbiaT2	BW O3_0.5	8-4	MYO-Norm	0.225364	0.0492593	0.0338945	0.307123	31.7467	2.20488	69.446	0.697945
							MYO-Def	0.116753	0.0396705	0.015663	0.250282
							BG	0.00464961	0.00324517	-5.92167e-05	0.0168064
	antlathla	ACSC	Included	SymbiaT2	BW O3_0.5	8-6	MYO-Norm	0.239595	0.0543995	0.0314362	0.349638	31.8368	2.12719	85.2399	0.942659
							MYO-Def	0.123877	0.0441623	0.007957	0.284707
							BG	0.00298181	0.00281083	-0.000788518	0.0151966
	antlathla	ACSC	Included	SymbiaT2	BW O3_0.5	16-2	MYO-Norm	0.294456	0.0670825	0.0610912	0.457857	40.4238	2.52719	100.695	0.480405
							MYO-Def	0.124926	0.069847	0.00875142	0.327723
							BG	0.00608703	0.00292424	0.000783336	0.0167749
4	antlathla	ACSC	Not Included	SymbiaT2	BW O3_0.5	2-4	MYO-Norm	0.0779274	0.0273454	0.0267415	0.144458	27.9563	1.24524	21.692	0.39612
							MYO-Def	0.0438757	0.0144501	0.0225553	0.120938
							BG	0.0090691	0.00359245	0.00245308	0.0177242
	antlathla	ACSC	Not Included	SymbiaT2	BW O3_0.5	2-6	MYO-Norm	0.105163	0.032957	0.0315952	0.180114	29.9196	1.46969	31.074	0.474269
							MYO-Def	0.0567263	0.0183185	0.0242051	0.148973
							BG	0.00713578	0.00338428	0.00187877	0.0165557
	antlathla	ACSC	Not Included	SymbiaT2	BW O3_0.5	2-8	MYO-Norm	0.119916	0.0318952	0.0357661	0.187249	30.4977	1.7573	39.804	0.536748
							MYO-Def	0.0638665	0.0204531	0.0220218	0.154609
							BG	0.0056128	0.00301266	0.00140238	0.0149796
	antlathla	ACSC	Not Included	SymbiaT2	BW O3_0.5	2-16	MYO-Norm	0.147577	0.032162	0.0325363	0.203256	32.2347	2.23709	69.3491	0.779333
							MYO-Def	0.0756276	0.0273187	0.013426	0.186204
							BG	0.00273058	0.00212803	0.000309647	0.01188
	antlathla	ACSC	Not Included	SymbiaT2	BW O3_0.5	2-32	MYO-Norm	0.165342	0.0404918	0.0287648	0.254147	33.2022	2.03564	111.274	1.20113
							MYO-Def	0.0829151	0.0338066	0.00371322	0.228622
							BG	0.00123708	0.0014859	-0.00119869	0.00959042
	antlathla	ACSC	Not Included	SymbiaT2	BW O3_0.5	4-4	MYO-Norm	0.122884	0.0334047	0.035686	0.19507	30.5224	1.72049	39.3216	0.535767
							MYO-Def	0.0654117	0.0210865	0.0224788	0.162298
							BG	0.00583295	0.0031251	0.00142775	0.0155694
	antlathla	ACSC	Not Included	SymbiaT2	BW O3_0.5	4-6	MYO-Norm	0.140645	0.0318299	0.0361735	0.200406	31.4466	2.11419	54.7858	0.654726
							MYO-Def	0.0733507	0.0246978	0.0169849	0.164543
							BG	0.003921	0.00256718	0.000805716	0.0135297
	antlathla	ACSC	Not Included	SymbiaT2	BW O3_0.5	4-8	MYO-Norm	0.150981	0.0328691	0.0339659	0.204483	32.1282	2.23386	67.9323	0.778441
							MYO-Def	0.0775561	0.0275562	0.0136259	0.185649
							BG	0.00285509	0.00222252	0.000336059	0.0123416
	antlathla	ACSC	Not Included	SymbiaT2	BW O3_0.5	4-12	MYO-Norm	0.162565	0.0369252	0.0314774	0.236519	32.7761	2.17356	89.9834	1.0108
							MYO-Def	0.0823058	0.0314197	0.00760811	0.212222
							BG	0.00178731	0.00180661	-0.000294304	0.0108857
	antlathla	ACSC	Not Included	SymbiaT2	BW O3_0.5	8-4	MYO-Norm	0.162206	0.0365937	0.0358801	0.225089	30.8187	2.0885	70.6651	0.757582
							MYO-Def	0.0857799	0.0297743	0.0139245	0.198215
							BG	0.00302993	0.00229542	0.00039294	0.0133678
	antlathla	ACSC	Not Included	SymbiaT2	BW O3_0.5	8-6	MYO-Norm	0.174246	0.0398124	0.0335008	0.25379	31.2547	2.08437	94.8691	1.00678
							MYO-Def	0.0912622	0.0338648	0.00938511	0.227349
							BG	0.00182434	0.0018367	-0.000692955	0.0115973
	antlathla	ACSC	Not Included	SymbiaT2	BW O3_0.5	16-2	MYO-Norm	0.213363	0.0504803	0.0676568	0.342653	35.045	2.19369	79.463	0.666175
							MYO-Def	0.102625	0.0575416	0.00628976	0.306927
							BG	0.00403056	0.00268506	0.0005387	0.017557
4	antlathla	ACSC	Included	SymbiaT2	BW O3_0.5	2-4	MYO-Norm	0.120982	0.0391532	0.0413003	0.203663	30.4441	1.44232	21.6938	0.443688
							MYO-Def	0.0645105	0.0201435	0.0334243	0.17122
							BG	0.0125692	0.0055768	0.0035044	0.0244068
	antlathla	ACSC	Included	SymbiaT2	BW O3_0.5	2-6	MYO-Norm	0.149074	0.0408287	0.0467651	0.230185	31.5917	1.75311	29.5937	0.513546
							MYO-Def	0.0774966	0.0236223	0.0285939	0.191064
							BG	0.00980898	0.00503736	0.00290558	0.0225131
	antlathla	ACSC	Included	SymbiaT2	BW O3_0.5	2-8	MYO-Norm	0.165475	0.0392078	0.0490406	0.239194	32.383	2.06478	37.5945	0.560409
							MYO-Def	0.0845194	0.0259822	0.0232948	0.193707
							BG	0.00785423	0.00440158	0.0021445	0.0204514
	antlathla	ACSC	Included	SymbiaT2	BW O3_0.5	2-16	MYO-Norm	0.198574	0.0429778	0.0432202	0.273169	34.6209	2.37648	66.1168	0.742922
							MYO-Def	0.0964381	0.0336363	0.0125586	0.230784
							BG	0.00404266	0.00300338	-2.39022e-05	0.0154422
	antlathla	ACSC	Included	SymbiaT2	BW O3_0.5	2-32	MYO-Norm	0.220151	0.0548216	0.0415173	0.336311	35.4421	2.10167	95.5487	1.10253
							MYO-Def	0.104934	0.0412025	0.00361855	0.27723
							BG	0.00208981	0.00230407	-0.000714104	0.0131465
	antlathla	ACSC	Included	SymbiaT2	BW O3_0.5	4-4	MYO-Norm	0.173963	0.0410514	0.0521689	0.253253	32.196	2.06415	37.0013	0.564995
							MYO-Def	0.0892266	0.0279795	0.024018	0.2083
							BG	0.00832138	0.00470154	0.00221999	0.0220567
	antlathla	ACSC	Included	SymbiaT2	BW O3_0.5	4-6	MYO-Norm	0.195938	0.0411024	0.0479367	0.264338	33.5006	2.3925	52.3171	0.652169
							MYO-Def	0.0976007	0.0319647	0.0170126	0.210335
							BG	0.00574268	0.0037452	0.000685153	0.0178438
	antlathla	ACSC	Included	SymbiaT2	BW O3_0.5	4-8	MYO-Norm	0.209104	0.0442046	0.0455787	0.283773	34.2437	2.4133	65.1195	0.748108
							MYO-Def	0.102425	0.0351983	0.0127916	0.237439
							BG	0.00429227	0.00321108	-2.74059e-05	0.016134
	antlathla	ACSC	Included	SymbiaT2	BW O3_0.5	4-12	MYO-Norm	0.223762	0.0509229	0.0433335	0.329728	34.7716	2.26741	83.186	0.942439
							MYO-Def	0.108299	0.0397026	0.00777743	0.267772
							BG	0.00285419	0.0026899	-0.000552352	0.0144243
	antlathla	ACSC	Included	SymbiaT2	BW O3_0.5	8-4	MYO-Norm	0.220834	0.0462787	0.0476705	0.298038	32.1038	2.3193	69.4903	0.69134
							MYO-Def	0.1135	0.0377982	0.0122745	0.25314
							BG	0.00459674	0.00317791	2.8388e-06	0.0166471
	antlathla	ACSC	Included	SymbiaT2	BW O3_0.5	8-6	MYO-Norm	0.235583	0.0520339	0.0465045	0.343695	32.3563	2.21361	86.2357	0.935914
							MYO-Def	0.1204	0.0424942	0.00749286	0.285344
							BG	0.00291891	0.00273185	-0.000601289	0.0149076
	antlathla	ACSC	Included	SymbiaT2	BW O3_0.5	16-2	MYO-Norm	0.291939	0.0643933	0.0871164	0.451923	39.9077	2.5864	101.816	0.482189
							MYO-Def	0.125392	0.0703752	0.0104843	0.355626
							BG	0.00594649	0.00286733	0.000798283	0.0153991
3	antlathla	ACSC	Not Included	SymbiaT2	BW O3_0.5	2-4	MYO-Norm	0.0688648	0.0231564	0.027152	0.120444	28.2688	1.31082	22.9438	0.358197
							MYO-Def	0.038511	0.0122554	0.0200632	0.0947121
							BG	0.00837933	0.00300145	0.00214248	0.0156895
	antlathla	ACSC	Not Included	SymbiaT2	BW O3_0.5	2-6	MYO-Norm	0.0938313	0.0288092	0.0255468	0.151712	30.3066	1.51502	31.8479	0.448994
							MYO-Def	0.0501849	0.0156824	0.0216404	0.118764
							BG	0.00656184	0.00294623	0.00173826	0.0141873
	antlathla	ACSC	Not Included	SymbiaT2	BW O3_0.5	2-8	MYO-Norm	0.107779	0.0282756	0.0222917	0.161399	30.8145	1.79577	39.8535	0.52233
							MYO-Def	0.0570024	0.0174502	0.0205971	0.125289
							BG	0.00517753	0.00270438	0.00133113	0.0127005
	antlathla	ACSC	Not Included	SymbiaT2	BW O3_0.5	2-16	MYO-Norm	0.134944	0.0291124	0.0143315	0.186573	32.4133	2.26933	64.171	0.792036
							MYO-Def	0.0688785	0.0231423	0.0142034	0.16263
							BG	0.00265503	0.00210288	0.000263741	0.0093349
	antlathla	ACSC	Not Included	SymbiaT2	BW O3_0.5	2-32	MYO-Norm	0.152962	0.0376571	0.00811882	0.239211	33.3421	2.03138	93.0024	1.18387
							MYO-Def	0.076466	0.0286432	0.00805615	0.204208
							BG	0.00138926	0.00164471	-0.000407141	0.00684613
	antlathla	ACSC	Not Included	SymbiaT2	BW O3_0.5	4-4	MYO-Norm	0.110525	0.0295644	0.0226856	0.167048	31.0219	1.7703	39.7591	0.519373
							MYO-Def	0.0581872	0.0180385	0.0211168	0.131819
							BG	0.00535236	0.00277987	0.00140287	0.0131875
	antlathla	ACSC	Not Included	SymbiaT2	BW O3_0.5	4-6	MYO-Norm	0.127849	0.0284129	0.0177035	0.177223	31.8508	2.17395	53.0908	0.655803
							MYO-Def	0.0660808	0.020982	0.0175322	0.140828
							BG	0.00367202	0.00240812	0.000666256	0.0110619
	antlathla	ACSC	Not Included	SymbiaT2	BW O3_0.5	4-8	MYO-Norm	0.13818	0.0296246	0.0145488	0.190221	32.5027	2.28832	63.5021	0.789796
							MYO-Def	0.0703893	0.0233649	0.01446	0.162088
							BG	0.00275513	0.00217599	0.000269095	0.00970878
	antlathla	ACSC	Not Included	SymbiaT2	BW O3_0.5	4-12	MYO-Norm	0.149912	0.0338848	0.0106363	0.219503	33.1322	2.20206	79.5125	1.02016
							MYO-Def	0.0752958	0.0266042	0.010405	0.187849
							BG	0.00184813	0.00188539	-0.000271308	0.00809964
	antlathla	ACSC	Not Included	SymbiaT2	BW O3_0.5	8-4	MYO-Norm	0.148299	0.0324924	0.0146098	0.201863	30.8281	2.15096	67.6476	0.748357
							MYO-Def	0.0784092	0.0250579	0.0163197	0.17189
							BG	0.00292939	0.00219223	0.00031946	0.0102716
	antlathla	ACSC	Not Included	SymbiaT2	BW O3_0.5	8-6	MYO-Norm	0.160543	0.0357895	0.010649	0.232117	31.2809	2.13768	84.7649	0.991187
							MYO-Def	0.0840364	0.0283741	0.0119885	0.200311
							BG	0.00191082	0.00189398	-0.000219224	0.00843434
	antlathla	ACSC	Not Included	SymbiaT2	BW O3_0.5	16-2	MYO-Norm	0.199441	0.0443741	0.030349	0.31097	35.2119	2.34094	73.6167	0.645444
							MYO-Def	0.0955641	0.0537085	0.00696501	0.273509
							BG	0.00419739	0.00270918	0.000540773	0.0133729
3	antlathla	ACSC	Included	SymbiaT2	BW O3_0.5	2-4	MYO-Norm	0.107438	0.0333996	0.0334575	0.174852	30.4903	1.50325	23.18	0.390739
							MYO-Def	0.0572302	0.0172281	0.0305394	0.136214
							BG	0.011862	0.00463495	0.00338614	0.0209419
	antlathla	ACSC	Included	SymbiaT2	BW O3_0.5	2-6	MYO-Norm	0.133689	0.0357588	0.0284209	0.199864	31.8095	1.80448	31.5586	0.454391
							MYO-Def	0.0691628	0.0204701	0.0305492	0.156674
							BG	0.00932282	0.00423621	0.00280117	0.0195434
	antlathla	ACSC	Included	SymbiaT2	BW O3_0.5	2-8	MYO-Norm	0.14946	0.0346605	0.0237416	0.210165	32.6333	2.12192	39.9239	0.494961
							MYO-Def	0.0759133	0.0225216	0.0281999	0.162894
							BG	0.00756346	0.00374362	0.00204664	0.0179276
	antlathla	ACSC	Included	SymbiaT2	BW O3_0.5	2-16	MYO-Norm	0.182448	0.03906	0.0138242	0.257705	34.9347	2.41864	65.5807	0.667643
							MYO-Def	0.0879761	0.0292796	0.0194399	0.21521
							BG	0.00416696	0.00278204	0.000154179	0.0134427
	antlathla	ACSC	Included	SymbiaT2	BW O3_0.5	2-32	MYO-Norm	0.204635	0.0509036	0.00627493	0.313383	35.6909	2.11479	80.7532	0.995596
							MYO-Def	0.0969844	0.0363985	0.0113913	0.269308
							BG	0.00254529	0.00253408	-0.000950601	0.0108026
	antlathla	ACSC	Included	SymbiaT2	BW O3_0.5	4-4	MYO-Norm	0.156807	0.0361828	0.0246662	0.221979	32.3335	2.11776	39.479	0.499127
							MYO-Def	0.0801806	0.0244193	0.0311303	0.177253
							BG	0.00795771	0.00397191	0.00212521	0.0191505
	antlathla	ACSC	Included	SymbiaT2	BW O3_0.5	4-6	MYO-Norm	0.178564	0.0365588	0.0183295	0.244009	33.757	2.46535	54.3741	0.579386
							MYO-Def	0.0884337	0.0278227	0.0247014	0.191712
							BG	0.00566805	0.00328399	0.00105939	0.0164146
	antlathla	ACSC	Included	SymbiaT2	BW O3_0.5	4-8	MYO-Norm	0.191941	0.0398984	0.0143674	0.268585	34.5798	2.47221	65.1807	0.671295
							MYO-Def	0.0933038	0.0307066	0.020496	0.220846
							BG	0.00438667	0.00294475	0.000164816	0.0146162
	antlathla	ACSC	Included	SymbiaT2	BW O3_0.5	4-12	MYO-Norm	0.207067	0.0468037	0.00953536	0.304456	35.1501	2.30129	77.0648	0.852842
							MYO-Def	0.0993583	0.0348708	0.0152894	0.25567
							BG	0.00315055	0.00268692	-0.000622205	0.0126214
	antlathla	ACSC	Included	SymbiaT2	BW O3_0.5	8-4	MYO-Norm	0.201775	0.0408648	0.0141086	0.274009	31.7684	2.38085	68.3832	0.607246
							MYO-Def	0.104482	0.0325724	0.0215112	0.232668
							BG	0.00485907	0.00295065	0.000243823	0.0144013
	antlathla	ACSC	Included	SymbiaT2	BW O3_0.5	8-6	MYO-Norm	0.217157	0.0463872	0.00945843	0.322623	32.1537	2.27802	75.6571	0.837151
							MYO-Def	0.111486	0.0367408	0.0163309	0.269015
							BG	0.00342863	0.00287028	-0.000524498	0.0129249
	antlathla	ACSC	Included	SymbiaT2	BW O3_0.5	16-2	MYO-Norm	0.27464	0.0604692	0.0313994	0.42685	39.4791	2.57109	92.5113	0.430298
							MYO-Def	0.119168	0.0676336	0.017361	0.326882
							BG	0.00689922	0.00296872	0.00142825	0.0153397
2	antlathla	ACSC	Not Included	SymbiaT2	BW O3_0.5	2-4	MYO-Norm	0.0553579	0.0176172	0.0240993	0.0932773	26.6602	1.3228	19.7889	0.313209
							MYO-Def	0.0320538	0.00970581	0.017623	0.0739826
							BG	0.00893148	0.00279742	0.00230302	0.0155198
	antlathla	ACSC	Not Included	SymbiaT2	BW O3_0.5	2-6	MYO-Norm	0.0764951	0.0232315	0.0295079	0.120629	29.2264	1.4894	25.2353	0.408185
							MYO-Def	0.0418942	0.0126951	0.020833	0.0949284
							BG	0.00742622	0.00303127	0.0019075	0.0157964
	antlathla	ACSC	Not Included	SymbiaT2	BW O3_0.5	2-8	MYO-Norm	0.089023	0.0234953	0.0296094	0.127172	29.9902	1.74832	29.9725	0.483814
							MYO-Def	0.0479458	0.0143148	0.0221365	0.101412
							BG	0.00613905	0.00297016	0.00159625	0.0153056
	antlathla	ACSC	Not Included	SymbiaT2	BW O3_0.5	2-16	MYO-Norm	0.115359	0.0241513	0.0231917	0.17383	32.0842	2.3205	44.8615	0.716944
							MYO-Def	0.059316	0.0195029	0.0171542	0.129197
							BG	0.00358668	0.00257145	0.000529718	0.0131829
	antlathla	ACSC	Not Included	SymbiaT2	BW O3_0.5	2-32	MYO-Norm	0.133762	0.0315791	0.0179925	0.211849	33.3756	2.1199	60.5053	1.02312
							MYO-Def	0.0668174	0.0244574	0.0082981	0.166926
							BG	0.00216079	0.00221075	-0.000644937	0.0111849
	antlathla	ACSC	Not Included	SymbiaT2	BW O3_0.5	4-4	MYO-Norm	0.0912747	0.0247276	0.0305368	0.133222	30.2359	1.71392	29.9953	0.481907
							MYO-Def	0.0488936	0.0148999	0.022507	0.106334
							BG	0.00631444	0.00304297	0.00157173	0.0158435
	antlathla	ACSC	Not Included	SymbiaT2	BW O3_0.5	4-6	MYO-Norm	0.107732	0.023898	0.0265397	0.159778	31.3629	2.15257	38.1774	0.605445
							MYO-Def	0.0562899	0.0175933	0.0214186	0.111464
							BG	0.00466084	0.00282188	0.00102287	0.0146083
	antlathla	ACSC	Not Included	SymbiaT2	BW O3_0.5	4-8	MYO-Norm	0.11806	0.0246499	0.0240222	0.177601	32.2365	2.33515	44.5254	0.715585
							MYO-Def	0.0604989	0.0197844	0.0177129	0.128843
							BG	0.00370539	0.00265152	0.000550968	0.0136359
	antlathla	ACSC	Not Included	SymbiaT2	BW O3_0.5	4-12	MYO-Norm	0.130022	0.0281494	0.0208431	0.199868	33.1254	2.29867	53.5279	0.896401
							MYO-Def	0.0653157	0.0227105	0.0122682	0.152245
							BG	0.00270978	0.00242905	-0.000123882	0.0123381
	antlathla	ACSC	Not Included	SymbiaT2	BW O3_0.5	8-4	MYO-Norm	0.126217	0.0274227	0.0245389	0.186812	30.1657	2.13331	46.7206	0.698919
							MYO-Def	0.0677158	0.020898	0.0199036	0.134864
							BG	0.0038653	0.00270153	0.000626058	0.0148648
	antlathla	ACSC	Not Included	SymbiaT2	BW O3_0.5	8-6	MYO-Norm	0.138711	0.0296623	0.0213505	0.208941	30.9339	2.20963	56.7813	0.888547
							MYO-Def	0.0731684	0.0236477	0.0144657	0.158504
							BG	0.00274932	0.0024429	-8.13597e-05	0.0131107
	antlathla	ACSC	Not Included	SymbiaT2	BW O3_0.5	16-2	MYO-Norm	0.175246	0.0380036	0.0521268	0.27312	34.8812	2.38503	52.2251	0.611439
							MYO-Def	0.0846063	0.0495469	0.00935233	0.226755
							BG	0.00548802	0.00335559	0.00105567	0.0177417
2	antlathla	ACSC	Included	SymbiaT2	BW O3_0.5	2-4	MYO-Norm	0.0897374	0.0271639	0.037891	0.141586	28.9607	1.48376	20.3265	0.349269
							MYO-Def	0.0494328	0.0146485	0.0284417	0.111927
							BG	0.0126401	0.0044148	0.00341191	0.0219373
	antlathla	ACSC	Included	SymbiaT2	BW O3_0.5	2-6	MYO-Norm	0.112926	0.0303492	0.0369937	0.167809	30.6528	1.74593	25.5531	0.424342
							MYO-Def	0.0599383	0.0178571	0.0309439	0.130469
							BG	0.0104144	0.00441927	0.0029094	0.021569
	antlathla	ACSC	Included	SymbiaT2	BW O3_0.5	2-8	MYO-Norm	0.127524	0.0297601	0.0330055	0.179324	31.681	2.06188	30.7106	0.472856
							MYO-Def	0.0661623	0.0198591	0.0290177	0.135982
							BG	0.00878162	0.00415244	0.00231502	0.0206033
	antlathla	ACSC	Included	SymbiaT2	BW O3_0.5	2-16	MYO-Norm	0.16014	0.0324626	0.0238114	0.239672	34.6146	2.53696	45.836	0.638632
							MYO-Def	0.0777836	0.0260524	0.0197486	0.166253
							BG	0.00547069	0.00349376	0.000328098	0.0176826
	antlathla	ACSC	Included	SymbiaT2	BW O3_0.5	2-32	MYO-Norm	0.183038	0.0428024	0.0158299	0.283808	35.8133	2.25531	52.3966	0.899624
							MYO-Def	0.0865055	0.032282	0.00899056	0.220473
							BG	0.00388309	0.00349332	-0.000652941	0.0156964
	antlathla	ACSC	Included	SymbiaT2	BW O3_0.5	4-4	MYO-Norm	0.133106	0.0313861	0.0345194	0.187113	31.3472	2.02427	30.2848	0.477616
							MYO-Def	0.0695721	0.0212764	0.0298215	0.147835
							BG	0.00920225	0.00439514	0.00237737	0.0216362
	antlathla	ACSC	Included	SymbiaT2	BW O3_0.5	4-6	MYO-Norm	0.153989	0.0306612	0.0288462	0.221968	33.102	2.49804	39.2367	0.55978
							MYO-Def	0.077396	0.0245734	0.0269721	0.151001
							BG	0.00701101	0.00392462	0.00112273	0.0198868
	antlathla	ACSC	Included	SymbiaT2	BW O3_0.5	4-8	MYO-Norm	0.167444	0.0328391	0.02508	0.247115	34.2363	2.60091	45.3526	0.641761
							MYO-Def	0.0820324	0.0272822	0.0220366	0.173344
							BG	0.005753	0.00369205	0.000296116	0.0187213
	antlathla	ACSC	Included	SymbiaT2	BW O3_0.5	4-12	MYO-Norm	0.182966	0.0386552	0.020151	0.275668	35.1725	2.46324	51.1017	0.787864
							MYO-Def	0.0877488	0.0310476	0.0146864	0.208518
							BG	0.00454448	0.00358043	-0.00039822	0.0175125
	antlathla	ACSC	Included	SymbiaT2	BW O3_0.5	8-4	MYO-Norm	0.174896	0.0338161	0.0260255	0.249693	30.535	2.41968	47.8725	0.597816
							MYO-Def	0.0930719	0.0285082	0.025689	0.181531
							BG	0.00611119	0.00365337	0.000351738	0.0193927
	antlathla	ACSC	Included	SymbiaT2	BW O3_0.5	8-6	MYO-Norm	0.190757	0.0375247	0.0213627	0.27789	31.3516	2.42671	50.8814	0.792065
							MYO-Def	0.0996956	0.0319077	0.0188361	0.218726
							BG	0.00473326	0.00374905	-0.000446495	0.0179059
	antlathla	ACSC	Included	SymbiaT2	BW O3_0.5	16-2	MYO-Norm	0.24853	0.0533051	0.0612813	0.394295	38.9985	2.61624	60.9191	0.459296
							MYO-Def	0.109071	0.0642235	0.0137525	0.29444
							BG	0.00888245	0.00407967	0.00136787	0.0261388
1	antlathla	ACSC	Not Included	SymbiaT2	BW O3_0.5	2-4	MYO-Norm	0.0393691	0.0123023	0.0179862	0.062726	24.3304	1.25248	15.8396	0.272602
							MYO-Def	0.0239607	0.00758709	0.0124537	0.0540919
							BG	0.00911764	0.00248549	0.00281006	0.016306
	antlathla	ACSC	Not Included	SymbiaT2	BW O3_0.5	2-6	MYO-Norm	0.0543072	0.0179968	0.0210208	0.0838	27.3784	1.29719	18.5684	0.356927
							MYO-Def	0.0309619	0.0102513	0.0142843	0.0718056
							BG	0.00819415	0.00292471	0.00236461	0.017534
	antlathla	ACSC	Not Included	SymbiaT2	BW O3_0.5	2-8	MYO-Norm	0.063704	0.0202078	0.0201797	0.102964	28.4734	1.39735	20.641	0.428987
							MYO-Def	0.0354667	0.0117591	0.0153174	0.0799601
							BG	0.00719434	0.00308628	0.00187308	0.0175367
	antlathla	ACSC	Not Included	SymbiaT2	BW O3_0.5	2-16	MYO-Norm	0.0855941	0.0240683	0.0154779	0.144554	31.1608	1.68979	27.6128	0.632772
							MYO-Def	0.0449237	0.0159222	0.0135154	0.0970473
							BG	0.00489876	0.0030998	0.000614242	0.0174609
	antlathla	ACSC	Not Included	SymbiaT2	BW O3_0.5	2-32	MYO-Norm	0.102865	0.0296555	0.0109281	0.170758	32.8921	1.71706	34.242	0.90238
							MYO-Def	0.0519448	0.0197107	0.00826124	0.114733
							BG	0.00332904	0.00300406	-0.000147828	0.0173212
	antlathla	ACSC	Not Included	SymbiaT2	BW O3_0.5	4-4	MYO-Norm	0.0653539	0.0211564	0.0207592	0.104712	28.9352	1.38648	20.6593	0.429232
							MYO-Def	0.0360209	0.0121858	0.0156606	0.0836073
							BG	0.00736993	0.00316341	0.00194636	0.0178982
	antlathla	ACSC	Not Included	SymbiaT2	BW O3_0.5	4-6	MYO-Norm	0.0785853	0.0231718	0.0180776	0.130036	30.3869	1.58075	24.4397	0.540619
							MYO-Def	0.0419564	0.0144549	0.0157916	0.093829
							BG	0.00594777	0.00321548	0.00130006	0.0178026
	antlathla	ACSC	Not Included	SymbiaT2	BW O3_0.5	4-8	MYO-Norm	0.0876222	0.0245892	0.0160038	0.146842	31.4949	1.70699	27.4556	0.63363
							MYO-Def	0.0456487	0.0162095	0.0138079	0.10094
							BG	0.00503671	0.00319141	0.000612032	0.0178177
	antlathla	ACSC	Not Included	SymbiaT2	BW O3_0.5	4-12	MYO-Norm	0.0987751	0.027357	0.0132673	0.164511	32.7073	1.77975	31.4571	0.787385
							MYO-Def	0.0500865	0.018495	0.0113374	0.10964
							BG	0.00398787	0.00313999	0.000100718	0.01781
	antlathla	ACSC	Not Included	SymbiaT2	BW O3_0.5	8-4	MYO-Norm	0.0935806	0.0273725	0.0164896	0.154949	29.1936	1.54507	27.9069	0.647944
							MYO-Def	0.0512882	0.0169847	0.0149754	0.115435
							BG	0.00517532	0.00335332	0.000646503	0.0191296
	antlathla	ACSC	Not Included	SymbiaT2	BW O3_0.5	8-6	MYO-Norm	0.105109	0.029371	0.0138655	0.173518	30.2034	1.66029	32.087	0.818827
							MYO-Def	0.0563445	0.0187153	0.0123585	0.125812
							BG	0.00400054	0.00327575	6.81504e-05	0.0188069															mean
	antlathla	ACSC	Not Included	SymbiaT2	BW O3_0.5	16-2	MYO-Norm	0.138237	0.0315772	0.0313187	0.23198	35.3923	2.28874	29.8148	0.62107											sd
							MYO-Def	0.0659651	0.0408455	0.00806826	0.214386
							BG	0.00746538	0.00463652	0.000983951	0.0278817
1	antlathla	ACSC	Included	SymbiaT2	BW O3_0.5	2-4	MYO-Norm	0.0650176	0.0197507	0.0260716	0.0981287	26.0504	1.36066	16.6302	0.298042
							MYO-Def	0.0381437	0.0109585	0.0220432	0.080865
							BG	0.0131176	0.0039096	0.00378182	0.0234956
	antlathla	ACSC	Included	SymbiaT2	BW O3_0.5	2-6	MYO-Norm	0.0822077	0.0253212	0.0234171	0.129154	28.1615	1.42678	18.7308	0.427561
							MYO-Def	0.04608	0.0140112	0.0232278	0.0990174
							BG	0.010265	0.00438891	0.0025305	0.0231712
	antlathla	ACSC	Included	SymbiaT2	BW O3_0.5	2-8	MYO-Norm	0.0937386	0.0279265	0.0206009	0.151011	29.4806	1.52849	21.1309	0.538581
							MYO-Def	0.0510531	0.0159607	0.0198878	0.108755
							BG	0.00823665	0.0044361	0.0025305	0.0207685
	antlathla	ACSC	Included	SymbiaT2	BW O3_0.5	2-16	MYO-Norm	0.122488	0.0347394	0.013417	0.204243	33.2464	1.7595	28.6926	0.585146
							MYO-Def	0.0613639	0.0210459	0.0130063	0.127416
							BG	0.00729557	0.00426897	0.000886004	0.0219207
	antlathla	ACSC	Included	SymbiaT2	BW O3_0.5	2-32	MYO-Norm	0.144994	0.0435619	0.00686401	0.240291	34.9888	1.72546	30.9105	0.829755
							MYO-Def	0.0698298	0.0257225	0.00790599	0.149362
							BG	0.0056532	0.00469077	-0.000516753	0.0211937
	antlathla	ACSC	Included	SymbiaT2	BW O3_0.5	4-4	MYO-Norm	0.0970728	0.0290185	0.0215185	0.155614	29.1097	1.50845	21.2428	0.429574
							MYO-Def	0.0532998	0.0170039	0.0204122	0.115731
							BG	0.0106377	0.00456968	0.00254394	0.0237221
	antlathla	ACSC	Included	SymbiaT2	BW O3_0.5	4-6	MYO-Norm	0.114539	0.0321682	0.0172483	0.190282	31.2453	1.69534	25.5417	0.510867
							MYO-Def	0.0600029	0.0199168	0.0159945	0.128192
							BG	0.00877802	0.0044844	0.00162952	0.0228277
	antlathla	ACSC	Included	SymbiaT2	BW O3_0.5	4-8	MYO-Norm	0.12682	0.0350906	0.0141881	0.210383	32.7471	1.7831	28.4044	0.585529
							MYO-Def	0.0642501	0.0220703	0.01327	0.135295
							BG	0.00762524	0.0044648	0.000831069	0.0223014
	antlathla	ACSC	Included	SymbiaT2	BW O3_0.5	4-12	MYO-Norm	0.141827	0.040228	0.0101788	0.232467	34.1338	1.79435	30.5733	0.718324
							MYO-Def	0.069644	0.0249141	0.00991626	0.142317
							BG	0.00645798	0.00463892	-4.8568e-05	0.0217981
	antlathla	ACSC	Included	SymbiaT2	BW O3_0.5	8-4	MYO-Norm	0.132436	0.0353445	0.0150068	0.212956	28.3979	1.65746	29.1361	0.583389
							MYO-Def	0.0738539	0.0218084	0.0147515	0.152208
							BG	0.00779141	0.00454542	0.000926078	0.0235974
	antlathla	ACSC	Included	SymbiaT2	BW O3_0.5	8-6	MYO-Norm	0.147704	0.0389532	0.0111259	0.233986	29.5282	1.72883	29.6639	0.76811
							MYO-Def	0.0803606	0.0237598	0.0111945	0.15977
							BG	0.00648247	0.00497925	-3.95757e-05	0.0230499
	antlathla	ACSC	Included	SymbiaT2	BW O3_0.5	16-2	MYO-Norm	0.201695	0.0422651	0.0419167	0.300774	38.5966	2.6579	32.4315	0.503795
							MYO-Def	0.0893584	0.0499165	0.0133542	0.252308
							BG	0.0123445	0.0062191	0.00206582	0.0308612
AVG	antlathla	ACSC	Not Included	SymbiaT2	BW O3_0.5	2-4	MYO-Norm	0.0617703	0.0154839	0.0237016	0.110721	27.3572	1.23697	19.6943	1.20849
							MYO-Def	0.0350049	0.00785132	0.018069	0.0884587
							BG	0.00870969	0.000393858	0.00237519	0.0158605
	antlathla	ACSC	Not Included	SymbiaT2	BW O3_0.5	2-6	MYO-Norm	0.084029	0.0202083	0.0279405	0.142086	29.4885	1.38619	26.4241	0.442048
							MYO-Def	0.0455417	0.0100651	0.0199051	0.111783
							BG	0.00723131	0.00059723	0.00199856	0.0156983
	antlathla	ACSC	Not Included	SymbiaT2	BW O3_0.5	2-8	MYO-Norm	0.0966017	0.0222694	0.0284163	0.151868	29.9963	1.61045	32.3305	0.509134
							MYO-Def	0.0518139	0.0110465	0.0193209	0.118492
							BG	0.00599405	0.000761107	0.0016046	0.0150146
	antlathla	ACSC	Not Included	SymbiaT2	BW O3_0.5	2-16	MYO-Norm	0.121964	0.0245346	0.0231943	0.177605	31.6612	2.10779	50.9475	0.731781
							MYO-Def	0.0631465	0.0118964	0.0132567	0.145273
							BG	0.00353984	0.000968857	0.000442982	0.0125256
	antlathla	ACSC	Not Included	SymbiaT2	BW O3_0.5	2-32	MYO-Norm	0.139367	0.0248409	0.018285	0.216843	32.6729	1.99902	71.9797	1.07107
							MYO-Def	0.0706206	0.0120016	0.00598236	0.185083
							BG	0.00216216	0.000967244	-0.000531345	0.0110444
	antlathla	ACSC	Not Included	SymbiaT2	BW O3_0.5	4-4	MYO-Norm	0.0990065	0.0227855	0.0290119	0.157793	30.2569	1.58358	32.1923	0.507406
							MYO-Def	0.0528334	0.0114047	0.0196815	0.124168
							BG	0.00618205	0.000760666	0.00164746	0.0154439
	antlathla	ACSC	Not Included	SymbiaT2	BW O3_0.5	4-6	MYO-Norm	0.114962	0.0245638	0.0263647	0.170222	31.0927	1.94857	42.2468	0.622577
							MYO-Def	0.0602719	0.0121488	0.0166197	0.130939
							BG	0.00459049	0.000928756	0.000984697	0.0139892
	antlathla	ACSC	Not Included	SymbiaT2	BW O3_0.5	4-8	MYO-Norm	0.124779	0.0250944	0.0240006	0.181258	31.8021	2.111	50.2036	0.731463
							MYO-Def	0.064439	0.0123426	0.0135344	0.146036
							BG	0.00366787	0.000987052	0.000460111	0.0128862
	antlathla	ACSC	Not Included	SymbiaT2	BW O3_0.5	4-12	MYO-Norm	0.136105	0.0253301	0.0212556	0.202699	32.5121	2.12051	61.981	0.923777
							MYO-Def	0.0692368	0.0124672	0.00909989	0.169348
							BG	0.00270479	0.00100667	-0.000113168	0.0119484
	antlathla	ACSC	Not Included	SymbiaT2	BW O3_0.5	8-4	MYO-Norm	0.133545	0.0272998	0.0250763	0.195259	30.0351	1.92814	52.4178	0.7117
							MYO-Def	0.0716314	0.0135076	0.015035	0.156419
							BG	0.0038534	0.000983682	0.000517724	0.0138869
	antlathla	ACSC	Not Included	SymbiaT2	BW O3_0.5	8-6	MYO-Norm	0.145296	0.0275772	0.0223401	0.216498	30.5647	1.9975	65.074	0.917915
							MYO-Def	0.0770984	0.0136954	0.0105702	0.179418
							BG	0.00276868	0.0010129	-0.000172387	0.0125926
	antlathla	ACSC	Not Included	SymbiaT2	BW O3_0.5	16-2	MYO-Norm	0.181762	0.0299864	0.0496768	0.289071	35.3963	2.31076	57.187	0.635186
							MYO-Def	0.0867116	0.0142175	0.00669246	0.251972
							BG	0.00544447	0.0014763	0.000842306	0.0182431
AVG	antlathla	ACSC	Included	SymbiaT2	BW O3_0.5	2-4	MYO-Norm	0.0978024	0.0220142	0.0361836	0.16365	29.3811	1.39524	19.9993	0.396068
							MYO-Def	0.05302	0.0102381	0.0278331	0.128644
							BG	0.0123019	0.000556962	0.00349878	0.0228252
	antlathla	ACSC	Included	SymbiaT2	BW O3_0.5	2-6	MYO-Norm	0.121429	0.0261381	0.0368622	0.189493	30.6644	1.62383	25.9603	0.47122
							MYO-Def	0.0640935	0.0121547	0.0274211	0.148329
							BG	0.00997565	0.000655431	0.00290413	0.0222926
	antlathla	ACSC	Included	SymbiaT2	BW O3_0.5	2-8	MYO-Norm	0.135805	0.0280057	0.0339235	0.199146	31.4822	1.89058	31.8252	0.523358
							MYO-Def	0.0704547	0.0129479	0.0244315	0.154845
							BG	0.0083065	0.000857646	0.0023415	0.0208811
	antlathla	ACSC	Included	SymbiaT2	BW O3_0.5	2-16	MYO-Norm	0.167078	0.029688	0.0261559	0.241228	34.005	2.30691	50.2793	0.670905
							MYO-Def	0.0821103	0.0136159	0.0148519	0.184349
							BG	0.00537071	0.0014808	0.000372182	0.0172812
	antlathla	ACSC	Included	SymbiaT2	BW O3_0.5	2-32	MYO-Norm	0.188849	0.0294502	0.0210392	0.289986	34.9399	2.10211	62.4413	0.953877
							MYO-Def	0.0909613	0.013623	0.00658607	0.230582
							BG	0.00381263	0.00171725	-0.000671489	0.0160887
	antlathla	ACSC	Included	SymbiaT2	BW O3_0.5	4-4	MYO-Norm	0.142077	0.0300834	0.0355512	0.210615	31.2413	1.86883	31.4776	0.513131
							MYO-Def	0.0740688	0.0138768	0.0259964	0.16695
							BG	0.0089766	0.00109074	0.00242752	0.0222641
	antlathla	ACSC	Included	SymbiaT2	BW O3_0.5	4-6	MYO-Norm	0.162244	0.031816	0.0305191	0.229941	32.7095	2.24457	41.93	0.59261
							MYO-Def	0.08198	0.0145813	0.0202707	0.174348
							BG	0.00686609	0.00138754	0.00117156	0.0196527
	antlathla	ACSC	Included	SymbiaT2	BW O3_0.5	4-8	MYO-Norm	0.175065	0.032155	0.0274105	0.250071	33.6517	2.3448	49.6532	0.67509
							MYO-Def	0.0867073	0.0148441	0.015862	0.191224
							BG	0.00565635	0.00153878	0.000368154	0.018074
	antlathla	ACSC	Included	SymbiaT2	BW O3_0.5	4-12	MYO-Norm	0.189818	0.0320647	0.0237924	0.281547	34.3776	2.26218	58.3529	0.831492
							MYO-Def	0.0925905	0.0150563	0.0102781	0.219241
							BG	0.00448687	0.00171179	-0.00037676	0.0170891
	antlathla	ACSC	Included	SymbiaT2	BW O3_0.5	8-4	MYO-Norm	0.183373	0.0349677	0.0281202	0.259341	30.5094	2.17422	52.1332	0.629888
							MYO-Def	0.0971258	0.0155534	0.0182826	0.205337
							BG	0.00601808	0.00149329	0.00042499	0.018583
	antlathla	ACSC	Included	SymbiaT2	BW O3_0.5	8-6	MYO-Norm	0.198321	0.0348204	0.0249216	0.29403	31.0364	2.16814	58.1705	0.838316
							MYO-Def	0.103976	0.0157691	0.0126552	0.231125
							BG	0.00467318	0.00172235	-0.000404576	0.0179821
	antlathla	ACSC	Included	SymbiaT2	BW O3_0.5	16-2	MYO-Norm	0.254181	0.0355336	0.058833	0.391312	39.5961	2.6734	68.1618	0.486717
							MYO-Def	0.109833	0.0141535	0.0121873	0.302551
							BG	0.00875	0.00272287	0.00143401	0.0224199
	Below are extra 8 frames to increase sample size for statistical test.
8	antlathla	ACSC	Not Included	SymbiaT2	BW O3_0.5	2-4	MYO-Norm	0.0468013	0.0181743	0.01842	0.0832685	26.4926	1.07867	14.9467	7.11769
							MYO-Def	0.0271972	0.00933068	0.013476	0.0643199
							BG	0.00869702	0.00313121	0.0025534	0.0152229
	antlathla	ACSC	Not Included	SymbiaT2	BW O3_0.5	2-6	MYO-Norm	0.0641347	0.0251404	0.0220811	0.113008	28.4766	1.13088	18.4163	0.448098
							MYO-Def	0.035704	0.0128318	0.014904	0.0843995
							BG	0.00777173	0.0034825	0.00220156	0.0164544
	antlathla	ACSC	Not Included	SymbiaT2	BW O3_0.5	2-8	MYO-Norm	0.0741703	0.0262496	0.024212	0.121664	28.6263	1.25769	21.0164	0.51469
							MYO-Def	0.0411565	0.0145177	0.0149731	0.0921306
							BG	0.00685688	0.00352917	0.00183559	0.0171157
	antlathla	ACSC	Not Included	SymbiaT2	BW O3_0.5	2-16	MYO-Norm	0.0958458	0.0250129	0.0205526	0.146457	29.833	1.76097	28.3187	0.70132
							MYO-Def	0.0517989	0.0181983	0.010527	0.10406
							BG	0.00482596	0.00338454	0.000737903	0.0146505
	antlathla	ACSC	Not Included	SymbiaT2	BW O3_0.5	2-32	MYO-Norm	0.111765	0.0273076	0.0168169	0.170327	30.8324	1.92905	32.4932	0.970824
							MYO-Def	0.0590872	0.0216128	0.00522707	0.138322
							BG	0.00354301	0.00343964	-0.000838612	0.0144634
	antlathla	ACSC	Not Included	SymbiaT2	BW O3_0.5	4-4	MYO-Norm	0.0761858	0.0277942	0.0239545	0.127462	29.1808	1.23837	21.0779	0.513189
							MYO-Def	0.0417664	0.0150662	0.0150767	0.0965054
							BG	0.00704318	0.00361448	0.00185426	0.0173101
	antlathla	ACSC	Not Included	SymbiaT2	BW O3_0.5	4-6	MYO-Norm	0.0894715	0.0268433	0.0230368	0.134129	29.6053	1.52274	25.2045	0.614392
							MYO-Def	0.0485962	0.0170674	0.0131541	0.104447
							BG	0.00577778	0.00354982	0.00123643	0.0162721
	antlathla	ACSC	Not Included	SymbiaT2	BW O3_0.5	4-8	MYO-Norm	0.0981612	0.0260595	0.0209094	0.149745	30.233	1.7489	28.04	0.702002
							MYO-Def	0.0525858	0.0184965	0.0107555	0.108974
							BG	0.00498681	0.00350075	0.00074794	0.0152275
	antlathla	ACSC	Not Included	SymbiaT2	BW O3_0.5	4-12	MYO-Norm	0.108503	0.0263817	0.0185726	0.165986	30.9494	1.94409	30.8546	0.854412
							MYO-Def	0.0572145	0.0204176	0.0073505	0.124828
							BG	0.0041158	0.00351659	9.28325e-05	0.0151532
	antlathla	ACSC	Not Included	SymbiaT2	BW O3_0.5	8-4	MYO-Norm	0.10479	0.030208	0.022402	0.159813	28.6158	1.54362	29.1938	0.691564
							MYO-Def	0.0581604	0.0190374	0.0128237	0.124136
							BG	0.00519035	0.00358946	0.000917381	0.0161706
	antlathla	ACSC	Not Included	SymbiaT2	BW O3_0.5	8-6	MYO-Norm	0.115494	0.0298474	0.0200038	0.17723	29.1598	1.74719	31.6931	0.865437
							MYO-Def	0.0633449	0.0203033	0.00935647	0.12874
							BG	0.00421075	0.00364414	-8.2295e-05	0.0156891
	antlathla	ACSC	Not Included	SymbiaT2	BW O3_0.5	16-2	MYO-Norm	0.149019	0.0330615	0.0489784	0.235449	36.0916	2.39069	31.4593	0.639659
							MYO-Def	0.0699791	0.0422872	0.00469704	0.204753
							BG	0.00740532	0.00473688	0.00152139	0.0218234
8	antlathla	ACSC	Included	SymbiaT2	BW O3_0.5	2-4	MYO-Norm	0.0764984	0.0278337	0.0302947	0.130531	27.6355	1.19017	15.3092	0.400302
							MYO-Def	0.0433717	0.0142583	0.0232055	0.0982033
							BG	0.0124828	0.00499689	0.00356767	0.0241169
	antlathla	ACSC	Included	SymbiaT2	BW O3_0.5	2-6	MYO-Norm	0.0953896	0.0325072	0.032614	0.155295	28.6888	1.30835	18.2639	0.472138
							MYO-Def	0.0528589	0.0180122	0.023566	0.118799
							BG	0.0110621	0.00522284	0.00303438	0.026798
	antlathla	ACSC	Included	SymbiaT2	BW O3_0.5	2-8	MYO-Norm	0.107162	0.0324854	0.0287692	0.161272	29.3485	1.49695	20.7387	0.519686
							MYO-Def	0.058533	0.0198491	0.0218036	0.127632
							BG	0.009943	0.00516724	0.00257392	0.027161
	antlathla	ACSC	Included	SymbiaT2	BW O3_0.5	2-16	MYO-Norm	0.134832	0.0315039	0.0208439	0.200156	31.9305	2.07166	26.8632	0.664066
							MYO-Def	0.0695666	0.0238045	0.0138013	0.141018
							BG	0.0075583	0.00501921	0.000715758	0.0226489
	antlathla	ACSC	Included	SymbiaT2	BW O3_0.5	2-32	MYO-Norm	0.155409	0.0369669	0.0150091	0.23729	32.8736	2.08018	27.4198	0.863137
							MYO-Def	0.0785111	0.0282608	0.00632343	0.195312
							BG	0.00656647	0.00566776	-0.000527644	0.023148
	antlathla	ACSC	Included	SymbiaT2	BW O3_0.5	4-4	MYO-Norm	0.111279	0.0347495	0.0295532	0.172352	29.1418	1.44526	20.5714	0.52169
							MYO-Def	0.0610571	0.0211431	0.023099	0.136653
							BG	0.010369	0.0054094	0.00266089	0.0281087
	antlathla	ACSC	Included	SymbiaT2	BW O3_0.5	4-6	MYO-Norm	0.128462	0.0327702	0.024569	0.187977	30.5961	1.8368	24.2609	0.598643
							MYO-Def	0.0682697	0.023249	0.0184191	0.146497
							BG	0.00884506	0.00529503	0.00157836	0.0261213
	antlathla	ACSC	Included	SymbiaT2	BW O3_0.5	4-8	MYO-Norm	0.140138	0.0323169	0.0215462	0.205931	31.6515	2.08509	26.3491	0.667824
							MYO-Def	0.0727544	0.0248547	0.0144688	0.151302
							BG	0.00796394	0.00531851	0.00073055	0.0232827
	antlathla	ACSC	Included	SymbiaT2	BW O3_0.5	4-12	MYO-Norm	0.15404	0.034437	0.0178979	0.226117	32.49	2.19384	27.3535	0.783079
							MYO-Def	0.0784908	0.0273495	0.00927961	0.181171
							BG	0.00719142	0.00563145	-0.000112748	0.0239047
	antlathla	ACSC	Included	SymbiaT2	BW O3_0.5	8-4	MYO-Norm	0.144945	0.0353084	0.0220111	0.210396	27.8753	1.78973	27.2484	0.637326
							MYO-Def	0.0817525	0.0242737	0.0180682	0.165137
							BG	0.00834642	0.00531939	0.0009129	0.0238175
	antlathla	ACSC	Included	SymbiaT2	BW O3_0.5	8-6	MYO-Norm	0.159012	0.0360522	0.0184177	0.235457	28.5585	1.95958	26.2978	0.810109
							MYO-Def	0.0883649	0.0257343	0.0130305	0.182958
							BG	0.00746391	0.00604658	-0.000118984	0.0261539
	antlathla	ACSC	Included	SymbiaT2	BW O3_0.5	16-2	MYO-Norm	0.21404	0.0415166	0.0491501	0.315797	39.2298	2.90527	30.5503	0.557198
							MYO-Def	0.093423	0.0544281	0.0100558	0.262769
							BG	0.0125739	0.00700615	0.00129483	0.0310949
7	antlathla	ACSC	Not Included	SymbiaT2	None	2-4	MYO-Norm	0.0520566	0.018428	0.0206312	0.0898039	27.4449	1.21665	17.444	0.357392
							MYO-Def	0.0296361	0.00985336	0.0148769	0.0689468
							BG	0.00835	0.00298422	0.00248957	0.0147549
	antlathla	ACSC	Not Included	SymbiaT2	None	2-6	MYO-Norm	0.0715742	0.0246246	0.025564	0.119414	29.7077	1.33144	22.4575	0.443783
							MYO-Def	0.0387881	0.0131624	0.0171667	0.0890216
							BG	0.00718167	0.0031871	0.00208852	0.0149837
	antlathla	ACSC	Not Included	SymbiaT2	None	2-8	MYO-Norm	0.0829656	0.0249001	0.0279559	0.127179	30.1221	1.54263	26.5302	0.509343
							MYO-Def	0.044554	0.0148153	0.016655	0.0961445
							BG	0.00613969	0.00312721	0.00161145	0.0149051
	antlathla	ACSC	Not Included	SymbiaT2	BW O3_0.5	2-16	MYO-Norm	0.107272	0.023529	0.0236433	0.15718	31.6011	2.18955	38.5796	0.705769
							MYO-Def	0.055754	0.0193438	0.0116372	0.124609
							BG	0.00393973	0.00278054	0.000649806	0.0139944
	antlathla	ACSC	Not Included	SymbiaT2	BW O3_0.5	2-32	MYO-Norm	0.12459	0.0289237	0.021009	0.188134	32.4548	2.11092	47.4188	1.00273
							MYO-Def	0.0635345	0.0236368	0.00575924	0.169492
							BG	0.00262028	0.00262744	-0.000573174	0.0137231
	antlathla	ACSC	Not Included	SymbiaT2	None	4-4	MYO-Norm	0.0851115	0.0262669	0.0283584	0.132749	30.4584	1.51302	26.5585	0.508582
							MYO-Def	0.0453692	0.0154127	0.0168212	0.100946
							BG	0.00630121	0.00320468	0.00167378	0.0153248
	antlathla	ACSC	Not Included	SymbiaT2	None	4-6	MYO-Norm	0.100174	0.0246139	0.0261029	0.143879	31.1586	1.93368	33.2792	0.612937
							MYO-Def	0.0525785	0.0177837	0.0142802	0.107791
							BG	0.00491096	0.00301011	0.00104807	0.0148001
	antlathla	ACSC	Not Included	SymbiaT2	None	4-8	MYO-Norm	0.109822	0.0242802	0.0242804	0.16063	31.8323	2.18431	38.1138	0.708314
							MYO-Def	0.0567866	0.019641	0.0117317	0.125077
							BG	0.004068	0.00288142	0.000684135	0.0144313
	antlathla	ACSC	Not Included	SymbiaT2	BW O3_0.5	4-12	MYO-Norm	0.121099	0.0263784	0.0225218	0.180479	32.4815	2.25114	43.6615	0.877729
							MYO-Def	0.0617175	0.0221206	0.00803052	0.152187
							BG	0.00315996	0.00277359	7.37939e-06	0.0141868
	antlathla	ACSC	Not Included	SymbiaT2	None	8-4	MYO-Norm	0.116828	0.0278931	0.0250422	0.171379	29.8861	1.92747	39.7538	0.692174
							MYO-Def	0.063065	0.0201765	0.0136569	0.126844
							BG	0.00424574	0.00293879	0.00083625	0.0155105
	antlathla	ACSC	Not Included	SymbiaT2	None	8-6	MYO-Norm	0.128484	0.0288367	0.0233342	0.189271	30.3759	2.07618	45.2197	0.878488
							MYO-Def	0.0686138	0.0221827	0.00969277	0.154577
							BG	0.00323434	0.00284133	3.94511e-05	0.0147903
	antlathla	ACSC	Not Included	SymbiaT2	None	16-2	MYO-Norm	0.163101	0.0350539	0.0469632	0.258534	35.7559	2.45098	41.9976	0.621742
							MYO-Def	0.0771847	0.0464885	0.00652712	0.224172
							BG	0.00624629	0.00388358	0.00123012	0.0196785
7	antlathla	ACSC	Included	SymbiaT2	None	2-4	MYO-Norm	0.0844114	0.0283737	0.0349074	0.141103	29.0394	1.339	17.623	0.400077
							MYO-Def	0.046419	0.0144083	0.0235314	0.105646
							BG	0.0119723	0.00478984	0.00360926	0.0217047
	antlathla	ACSC	Included	SymbiaT2	None	2-6	MYO-Norm	0.105534	0.0319818	0.0347432	0.166445	30.3886	1.53812	22.1762	0.465794
							MYO-Def	0.0563421	0.0176556	0.0233268	0.126156
							BG	0.0102167	0.00475888	0.00305393	0.022499
	antlathla	ACSC	Included	SymbiaT2	None	2-8	MYO-Norm	0.118747	0.0311565	0.0306397	0.172327	31.2127	1.81326	26.3255	0.506759
							MYO-Def	0.0622523	0.0193997	0.0214828	0.134506
							BG	0.00890114	0.00451073	0.00249808	0.0215937
	antlathla	ACSC	Included	SymbiaT2	BW O3_0.5	2-16	MYO-Norm	0.149187	0.0308692	0.0219515	0.219696	33.9218	2.44829	37.5631	0.644618
							MYO-Def	0.0736102	0.0239782	0.0139108	0.157464
							BG	0.00616123	0.00397164	0.00060521	0.0185152
	antlathla	ACSC	Included	SymbiaT2	BW O3_0.5	2-32	MYO-Norm	0.171178	0.0392544	0.0152453	0.268821	34.8155	2.25228	39.8588	0.872502
							MYO-Def	0.0827661	0.0286874	0.00669087	0.21595
							BG	0.00492218	0.00429461	-0.000777755	0.0193449
	antlathla	ACSC	Included	SymbiaT2	None	4-4	MYO-Norm	0.123788	0.0332355	0.0319048	0.185528	30.9365	1.76002	26.0446	0.510933
							MYO-Def	0.065293	0.0206311	0.0227974	0.144971
							BG	0.00930245	0.00475293	0.00260165	0.0226556
	antlathla	ACSC	Included	SymbiaT2	None	4-6	MYO-Norm	0.143049	0.0309459	0.0264821	0.206124	32.5387	2.2697	32.717	0.581339
							MYO-Def	0.072811	0.0230417	0.0181797	0.154003
							BG	0.00752112	0.00437232	0.00151518	0.0203194
	antlathla	ACSC	Included	SymbiaT2	None	4-8	MYO-Norm	0.15584	0.0314936	0.0231251	0.225996	33.6204	2.4901	36.8603	0.651701
							MYO-Def	0.0774178	0.0249632	0.0144855	0.16421
							BG	0.00648742	0.00422786	0.000612142	0.0199593
	antlathla	ACSC	Included	SymbiaT2	BW O3_0.5	4-12	MYO-Norm	0.170822	0.0357357	0.0189894	0.250585	34.4398	2.44909	39.6322	0.779941
							MYO-Def	0.0833022	0.027729	0.00969769	0.201569
							BG	0.00552629	0.00431018	-0.000363678	0.0205438
	antlathla	ACSC	Included	SymbiaT2	None	8-4	MYO-Norm	0.161138	0.033822	0.0230273	0.235139	29.7627	2.1855	38.1658	0.612609
							MYO-Def	0.0872199	0.0246863	0.0180267	0.177662
							BG	0.00689192	0.00422205	0.000825281	0.0210138
	antlathla	ACSC	Included	SymbiaT2	None	8-6	MYO-Norm	0.176331	0.0363161	0.0188113	0.258226	30.4557	2.26707	37.9174	0.799619
							MYO-Def	0.0939998	0.0266544	0.0131098	0.206042
							BG	0.00581577	0.0046504	-0.000307675	0.0222969
	antlathla	ACSC	Included	SymbiaT2	None	16-2	MYO-Norm	0.231109	0.04692	0.0516089	0.358033	39.2399	2.77621	43.0358	0.512039
							MYO-Def	0.100849	0.0578878	0.0119706	0.272045
							BG	0.0104878	0.00537016	0.00137693	0.0281902
6	antlathla	ACSC	Not Included	SymbiaT2	None	2-4	MYO-Norm	0.0722836	0.0259611	0.026637	0.130688	29.4855	1.26804	22.8605	0.391538
							MYO-Def	0.0393638	0.0130069	0.0192811	0.103692
							BG	0.00807572	0.00316195	0.00198209	0.0148293
	antlathla	ACSC	Not Included	SymbiaT2	None	2-6	MYO-Norm	0.0975572	0.0318545	0.0338424	0.16392	30.9976	1.44938	32.4863	0.469037
							MYO-Def	0.0513878	0.0168356	0.0202603	0.130496
							BG	0.00640254	0.00300303	0.0016873	0.013841
	antlathla	ACSC	Not Included	SymbiaT2	None	2-8	MYO-Norm	0.111298	0.0307781	0.0360431	0.171374	31.0927	1.71536	41.2319	0.526923
							MYO-Def	0.0585024	0.0188726	0.0188288	0.138908
							BG	0.0051228	0.00269932	0.00139465	0.0124607
	antlathla	ACSC	Not Included	SymbiaT2	BW O3_0.5	2-16	MYO-Norm	0.137693	0.0291244	0.0312516	0.189879	32.0124	2.29292	68.7777	0.736709
							MYO-Def	0.0709131	0.024911	0.0118195	0.167643
							BG	0.00271749	0.002002	0.000332208	0.0094157
	antlathla	ACSC	Not Included	SymbiaT2	BW O3_0.5	2-32	MYO-Norm	0.154927	0.0358457	0.0293716	0.233469	32.5633	2.12337	98.3089	1.08413
							MYO-Def	0.0788134	0.0305417	0.00381103	0.208296
							BG	0.00145362	0.00157592	-0.00025088	0.00730396
	antlathla	ACSC	Not Included	SymbiaT2	None	4-4	MYO-Norm	0.113956	0.0322278	0.0374533	0.177581	31.294	1.68559	40.762	0.527521
							MYO-Def	0.059633	0.0194765	0.0191192	0.145164
							BG	0.00529958	0.00279564	0.00139264	0.0130043
	antlathla	ACSC	Not Included	SymbiaT2	None	4-6	MYO-Norm	0.130811	0.0297649	0.0343457	0.189171	31.6618	2.11371	55.6432	0.63289
							MYO-Def	0.0678966	0.0226734	0.0151874	0.153526
							BG	0.00371453	0.00235089	0.000869472	0.0110673
	antlathla	ACSC	Not Included	SymbiaT2	None	4-8	MYO-Norm	0.140791	0.0298774	0.0324935	0.194053	32.0882	2.28951	67.4697	0.738488
							MYO-Def	0.0723863	0.0251379	0.011973	0.166997
							BG	0.00282568	0.00208673	0.000350048	0.009865
	antlathla	ACSC	Not Included	SymbiaT2	BW O3_0.5	4-12	MYO-Norm	0.152032	0.0328709	0.030812	0.217379	32.4797	2.26786	84.7381	0.932137
							MYO-Def	0.0774855	0.0284279	0.00769536	0.192325
							BG	0.00192476	0.00179414	-0.000113977	0.00841835
	antlathla	ACSC	Not Included	SymbiaT2	None	8-4	MYO-Norm	0.150974	0.0337328	0.0346108	0.210972	30.5327	2.09375	71.951	0.695053
							MYO-Def	0.0803458	0.0267711	0.0131801	0.17885
							BG	0.00301889	0.00209829	0.000354458	0.0103995
	antlathla	ACSC	Not Included	SymbiaT2	None	8-6	MYO-Norm	0.162676	0.0357699	0.0332845	0.230486	30.7386	2.13853	90.6546	0.895859
							MYO-Def	0.0861809	0.0300458	0.00869355	0.205656
							BG	0.00200306	0.00179446	-0.000151438	0.00876626
	antlathla	ACSC	Not Included	SymbiaT2	None	16-2	MYO-Norm	0.201283	0.0447439	0.0710381	0.321122	36.0485	2.38395	76.3358	0.607694
							MYO-Def	0.0946159	0.0544582	0.00519728	0.297191
							BG	0.00433904	0.00263681	0.000631819	0.0134254
6	antlathla	ACSC	Included	SymbiaT2	None	2-4	MYO-Norm	0.112212	0.0375074	0.0426574	0.190243	31.2014	1.42295	22.7694	0.432036
							MYO-Def	0.058841	0.0184573	0.0309235	0.146603
							BG	0.0114069	0.00492819	0.00286998	0.020659
	antlathla	ACSC	Included	SymbiaT2	None	2-6	MYO-Norm	0.138194	0.0393716	0.0482949	0.214003	31.8746	1.69676	31.2665	0.487295
							MYO-Def	0.0713899	0.0220891	0.0297113	0.164928
							BG	0.00907021	0.00441987	0.0025271	0.0183851
	antlathla	ACSC	Included	SymbiaT2	None	2-8	MYO-Norm	0.15352	0.03722	0.0455856	0.220293	32.3011	2.01406	39.5346	0.521547
							MYO-Def	0.0785566	0.0243861	0.0260129	0.170608
							BG	0.00744551	0.00388318	0.00223327	0.0166274
	antlathla	ACSC	Included	SymbiaT2	BW O3_0.5	2-16	MYO-Norm	0.185316	0.0380215	0.0397032	0.25245	33.944	2.47032	64.0135	0.676265
							MYO-Def	0.0913906	0.0314844	0.0136048	0.212435
							BG	0.00428079	0.00289495	0.000258221	0.0133208
	antlathla	ACSC	Included	SymbiaT2	BW O3_0.5	2-32	MYO-Norm	0.206615	0.048047	0.0379593	0.313737	34.4113	2.20186	75.0781	0.988644
							MYO-Def	0.100822	0.0386448	0.00388773	0.259878
							BG	0.00278361	0.002752	-0.00059457	0.0122225
	antlathla	ACSC	Included	SymbiaT2	None	4-4	MYO-Norm	0.161078	0.0390196	0.0480359	0.234303	32.122	2.00729	39.1189	0.526352
							MYO-Def	0.0827543	0.0262688	0.0287275	0.184867
							BG	0.007823	0.00411765	0.00212231	0.0175996
	antlathla	ACSC	Included	SymbiaT2	None	4-6	MYO-Norm	0.182122	0.0372283	0.0439139	0.242635	33.0935	2.43279	53.4647	0.597892
							MYO-Def	0.0915532	0.0298903	0.0209189	0.190516
							BG	0.00569735	0.0034064	0.00105465	0.015426
	antlathla	ACSC	Included	SymbiaT2	None	4-8	MYO-Norm	0.194984	0.0390548	0.0415401	0.261375	33.6742	2.51538	63.4778	0.682366
							MYO-Def	0.0967463	0.0328592	0.0152015	0.217059
							BG	0.00450153	0.00307169	0.000287332	0.0143003
	antlathla	ACSC	Included	SymbiaT2	BW O3_0.5	4-12	MYO-Norm	0.209485	0.0445773	0.0392899	0.303216	34.0177	2.38568	73.2183	0.85379
							MYO-Def	0.103138	0.0370658	0.00820898	0.24748
							BG	0.00335106	0.0028611	-0.000397361	0.0134638
	antlathla	ACSC	Included	SymbiaT2	None	8-4	MYO-Norm	0.204765	0.0412362	0.0428364	0.272968	31.2083	2.3622	65.0456	0.624912
							MYO-Def	0.107357	0.0345655	0.0188167	0.228251
							BG	0.00503754	0.00314802	0.000257482	0.0148366
	antlathla	ACSC	Included	SymbiaT2	None	8-6	MYO-Norm	0.219405	0.0454662	0.0416685	0.319946	31.3665	2.30446	69.6648	0.848222
							MYO-Def	0.11463	0.0386278	0.0114404	0.260885
							BG	0.00371299	0.00314944	-0.000524031	0.0141504
	antlathla	ACSC	Included	SymbiaT2	None	16-2	MYO-Norm	0.276553	0.057539	0.0855745	0.426907	40.0846	2.75064	79.0798	0.495239
							MYO-Def	0.118284	0.0684051	0.00999243	0.324073
							BG	0.00706152	0.00349714	0.000949687	0.0188525
5	antlathla	ACSC	Not Included	SymbiaT2	BW O3_0.5	2-4	MYO-Norm	0.0815134	0.030179	0.0277527	0.15806	28.9009	1.21118	22.1713	0.407619
							MYO-Def	0.0449611	0.0155305	0.0212781	0.123853
							BG	0.00901949	0.00367652	0.002305	0.0174461
	antlathla	ACSC	Not Included	SymbiaT2	BW O3_0.5	2-6	MYO-Norm	0.109095	0.036203	0.0327449	0.19619	30.5937	1.41189	31.8083	0.482083
							MYO-Def	0.0579805	0.0196555	0.0215267	0.152713
							BG	0.00711448	0.00342977	0.00191281	0.0169007
	antlathla	ACSC	Not Included	SymbiaT2	BW O3_0.5	2-8	MYO-Norm	0.123752	0.0351417	0.0325435	0.202908	30.9762	1.66569	40.5824	0.542123
							MYO-Def	0.0652167	0.0218413	0.0190341	0.158686
							BG	0.00562492	0.0030494	0.00147479	0.0158296
	antlathla	ACSC	Not Included	SymbiaT2	BW O3_0.5	2-16	MYO-Norm	0.150831	0.0347372	0.0258683	0.210622	32.371	2.12368	68.3725	0.788343
							MYO-Def	0.0770603	0.0284228	0.00932305	0.181358
							BG	0.0027983	0.00220602	0.000328433	0.0109406
	antlathla	ACSC	Not Included	SymbiaT2	BW O3_0.5	2-32	MYO-Norm	0.167871	0.0421969	0.0212155	0.261532	33.1039	1.97885	102.327	1.22809
							MYO-Def	0.0843695	0.0347423	0.00143643	0.228916
							BG	0.00133584	0.00164053	-0.00144824	0.00969281
	antlathla	ACSC	Not Included	SymbiaT2	BW O3_0.5	4-4	MYO-Norm	0.126765	0.0367542	0.0337696	0.210017	31.1363	1.63782	40.3317	0.539048
							MYO-Def	0.0665682	0.0225431	0.0193832	0.165269
							BG	0.00583076	0.00314306	0.00152778	0.0161634
	antlathla	ACSC	Not Included	SymbiaT2	BW O3_0.5	4-6	MYO-Norm	0.144217	0.0350081	0.0296404	0.21496	31.8376	1.98966	55.234	0.658623
							MYO-Def	0.0745628	0.0260229	0.0137191	0.167839
							BG	0.00396436	0.00261102	0.000824935	0.0133505
	antlathla	ACSC	Not Included	SymbiaT2	BW O3_0.5	4-8	MYO-Norm	0.154269	0.0357103	0.0269818	0.217835	32.3947	2.11407	67.1392	0.786588
							MYO-Def	0.078775	0.0287089	0.0094728	0.180423
							BG	0.00292116	0.00229775	0.000346631	0.0112522
	antlathla	ACSC	Not Included	SymbiaT2	BW O3_0.5	4-12	MYO-Norm	0.165419	0.0392381	0.0239165	0.242679	32.8938	2.08697	85.5069	1.03072
							MYO-Def	0.0835302	0.0323875	0.0042719	0.209901
							BG	0.00187691	0.00193457	-0.000173938	0.0102646
	antlathla	ACSC	Not Included	SymbiaT2	BW O3_0.5	8-4	MYO-Norm	0.16563	0.0400078	0.0285423	0.241168	31.0918	1.96379	69.1023	0.766438
							MYO-Def	0.0870631	0.0312486	0.0101553	0.194218
							BG	0.0031273	0.00239688	0.000371992	0.0122626
	antlathla	ACSC	Not Included	SymbiaT2	BW O3_0.5	8-6	MYO-Norm	0.177194	0.0428602	0.0257105	0.262197	31.3755	1.9747	88.9671	1.02724
							MYO-Def	0.092558	0.0351222	0.00473923	0.225555
							BG	0.00193886	0.00199168	-0.000626243	0.0106825
	antlathla	ACSC	Not Included	SymbiaT2	BW O3_0.5	16-2	MYO-Norm	0.215277	0.053804	0.0464742	0.337654	36.2457	2.12886	75.6295	0.66903
							MYO-Def	0.100736	0.0568881	0.00318207	0.29118
							BG	0.00425462	0.00284647	0.000583698	0.0178462
5	antlathla	ACSC	Included	SymbiaT2	BW O3_0.5	2-4	MYO-Norm	0.125677	0.0428905	0.0428941	0.224425	30.8874	1.38296	22.1388	0.454619
							MYO-Def	0.0663613	0.0213745	0.0309433	0.173562
							BG	0.0124869	0.00567678	0.00348314	0.0247001
	antlathla	ACSC	Included	SymbiaT2	BW O3_0.5	2-6	MYO-Norm	0.153654	0.044457	0.0428703	0.25007	31.6517	1.6619	30.0994	0.521269
							MYO-Def	0.0797711	0.0251388	0.0286847	0.193117
							BG	0.00979318	0.00510488	0.00276959	0.0233923
	antlathla	ACSC	Included	SymbiaT2	BW O3_0.5	2-8	MYO-Norm	0.169786	0.0424702	0.0390941	0.255067	32.224	1.94857	37.9524	0.567111
							MYO-Def	0.0870298	0.0275927	0.0243179	0.1958
							BG	0.00788851	0.00447366	0.00213191	0.0213896
	antlathla	ACSC	Included	SymbiaT2	BW O3_0.5	2-16	MYO-Norm	0.201954	0.0443924	0.0309883	0.282508	34.0749	2.31239	64.4699	0.750123
							MYO-Def	0.0993014	0.0350906	0.0114672	0.234321
							BG	0.00417602	0.00313253	0.000130415	0.0153039
	antlathla	ACSC	Included	SymbiaT2	BW O3_0.5	2-32	MYO-Norm	0.222696	0.0547929	0.0270475	0.333588	34.6861	2.09339	88.4746	1.10288
							MYO-Def	0.107993	0.0427228	0.00207622	0.280665
							BG	0.00228226	0.00251706	-0.000849431	0.0142017
	antlathla	ACSC	Included	SymbiaT2	BW O3_0.5	4-4	MYO-Norm	0.178599	0.0446828	0.0412567	0.2716	32.2137	1.94775	37.3633	0.570941
							MYO-Def	0.0915681	0.0295748	0.0265544	0.210302
							BG	0.00837225	0.00478006	0.00224747	0.0229962
	antlathla	ACSC	Included	SymbiaT2	BW O3_0.5	4-6	MYO-Norm	0.199966	0.0437781	0.0357048	0.275123	33.1952	2.27675	51.8829	0.657931
							MYO-Def	0.100294	0.0334929	0.0182069	0.214117
							BG	0.00585803	0.00385418	0.000884243	0.0188904
	antlathla	ACSC	Included	SymbiaT2	BW O3_0.5	4-8	MYO-Norm	0.21266	0.0459938	0.0324055	0.294278	33.7581	2.33386	63.4334	0.754058
							MYO-Def	0.105317	0.0366275	0.012471	0.239697
							BG	0.00444593	0.00335249	0.000141733	0.0161835
	antlathla	ACSC	Included	SymbiaT2	BW O3_0.5	4-12	MYO-Norm	0.226734	0.0516499	0.0288901	0.328195	34.1066	2.23288	78.5495	0.946803
							MYO-Def	0.111406	0.0411114	0.00562842	0.26976
							BG	0.00304869	0.00288651	-0.00059277	0.015096
	antlathla	ACSC	Included	SymbiaT2	BW O3_0.5	8-4	MYO-Norm	0.224592	0.0491163	0.0322728	0.308861	31.7456	2.20367	67.1147	0.703014
							MYO-Def	0.116356	0.0397338	0.0150723	0.257706
							BG	0.00476006	0.00334639	8.59767e-05	0.0157381
	antlathla	ACSC	Included	SymbiaT2	BW O3_0.5	8-6	MYO-Norm	0.238671	0.0541714	0.0294244	0.352409	31.7994	2.12601	80.5021	0.951
							MYO-Def	0.123502	0.0443193	0.00770193	0.291297
							BG	0.00311754	0.00296478	-0.000738703	0.0138361
	antlathla	ACSC	Included	SymbiaT2	BW O3_0.5	16-2	MYO-Norm	0.293475	0.0677221	0.0586861	0.463537	40.4761	2.49728	94.9647	0.499008
							MYO-Def	0.124354	0.0701421	0.00824778	0.327442
							BG	0.00619301	0.00309036	0.000864959	0.0156967
4	antlathla	ACSC	Not Included	SymbiaT2	BW O3_0.5	2-4	MYO-Norm	0.0781831	0.0276356	0.0272544	0.141949	28.4013	1.25153	21.4905	0.398812
							MYO-Def	0.0435962	0.0142315	0.0229357	0.123654
							BG	0.00912217	0.00363803	0.00235234	0.0175058
	antlathla	ACSC	Not Included	SymbiaT2	BW O3_0.5	2-6	MYO-Norm	0.105399	0.0332614	0.0323684	0.176127	30.3564	1.47585	30.5148	0.479122
							MYO-Def	0.05631	0.0179841	0.0246095	0.154128
							BG	0.00720908	0.00345403	0.00198253	0.0162085
	antlathla	ACSC	Not Included	SymbiaT2	BW O3_0.5	2-8	MYO-Norm	0.120131	0.032213	0.0366924	0.184241	30.923	1.76165	38.7696	0.543753
							MYO-Def	0.063383	0.0200949	0.023212	0.161504
							BG	0.00569852	0.00309859	0.00150817	0.0147064
	antlathla	ACSC	Not Included	SymbiaT2	BW O3_0.5	2-16	MYO-Norm	0.147783	0.0323979	0.0337852	0.199251	32.6438	2.24518	65.3927	0.797241
							MYO-Def	0.0750439	0.0269565	0.0133148	0.176936
							BG	0.00283469	0.00225993	0.000378525	0.0114933
	antlathla	ACSC	Not Included	SymbiaT2	BW O3_0.5	2-32	MYO-Norm	0.165484	0.0404945	0.0307974	0.25201	33.5657	2.05396	99.5249	1.23676
							MYO-Def	0.0823101	0.033406	0.00331853	0.215576
							BG	0.00134443	0.00166274	-0.00122263	0.00936418
	antlathla	ACSC	Not Included	SymbiaT2	BW O3_0.5	4-4	MYO-Norm	0.123141	0.033718	0.0363797	0.192036	31.0013	1.72852	38.6507	0.540835
							MYO-Def	0.0648586	0.0207341	0.0235335	0.169095
							BG	0.00589089	0.003186	0.00154134	0.0151208
	antlathla	ACSC	Not Included	SymbiaT2	BW O3_0.5	4-6	MYO-Norm	0.140915	0.0321525	0.0373573	0.198663	31.9092	2.12038	52.966	0.665087
							MYO-Def	0.0727395	0.0243607	0.0186582	0.173973
							BG	0.0040002	0.00266048	0.000825	0.0130647
	antlathla	ACSC	Not Included	SymbiaT2	BW O3_0.5	4-8	MYO-Norm	0.151264	0.0331444	0.0352398	0.202641	32.5837	2.24319	64.6646	0.794504
							MYO-Def	0.0769148	0.0272276	0.0138849	0.176239
							BG	0.00294424	0.00233921	0.000394681	0.0118923
	antlathla	ACSC	Not Included	SymbiaT2	BW O3_0.5	4-12	MYO-Norm	0.162837	0.0370877	0.0331078	0.233613	33.2112	2.18926	83.2628	1.03829
							MYO-Def	0.0816424	0.031079	0.00737924	0.200581
							BG	0.00188358	0.0019557	-0.000244554	0.0105121
	antlathla	ACSC	Not Included	SymbiaT2	BW O3_0.5	8-4	MYO-Norm	0.162627	0.036898	0.0377572	0.221442	31.1776	2.09509	66.687	0.778821
							MYO-Def	0.0853223	0.029502	0.0155542	0.197277
							BG	0.00313122	0.00243866	0.000386795	0.0128853
	antlathla	ACSC	Not Included	SymbiaT2	BW O3_0.5	8-6	MYO-Norm	0.174653	0.0400158	0.0358689	0.252378	31.5907	2.0956	87.2157	1.03834
							MYO-Def	0.0907959	0.033581	0.00935392	0.216038
							BG	0.00192859	0.00200254	-0.00060323	0.0111569
	antlathla	ACSC	Not Included	SymbiaT2	BW O3_0.5	16-2	MYO-Norm	0.213333	0.0504405	0.0713118	0.328601	35.4887	2.21562	74.9852	0.66987
							MYO-Def	0.101576	0.0564638	0.00657825	0.292463
							BG	0.00424709	0.002845	0.000423371	0.0175031
4	antlathla	ACSC	Included	SymbiaT2	BW O3_0.5	2-4	MYO-Norm	0.120871	0.0393106	0.0401702	0.203005	30.5518	1.43912	21.6073	0.443672
							MYO-Def	0.0642984	0.0200648	0.0337141	0.173802
							BG	0.0126084	0.005594	0.00345091	0.0242402
	antlathla	ACSC	Included	SymbiaT2	BW O3_0.5	2-6	MYO-Norm	0.148913	0.0409946	0.0450349	0.232309	31.7058	1.74892	29.4805	0.512805
							MYO-Def	0.0772167	0.0235452	0.0283777	0.195155
							BG	0.00985019	0.00505123	0.00281381	0.0230792
	antlathla	ACSC	Included	SymbiaT2	BW O3_0.5	2-8	MYO-Norm	0.165283	0.0393022	0.0496062	0.241338	32.4952	2.06281	37.4516	0.559077
							MYO-Def	0.0842099	0.0259163	0.0231216	0.19883
							BG	0.00789379	0.00441324	0.00215129	0.0212065
	antlathla	ACSC	Included	SymbiaT2	BW O3_0.5	2-16	MYO-Norm	0.198322	0.0425795	0.0454408	0.275993	34.7289	2.40121	65.958	0.738557
							MYO-Def	0.0960795	0.0334693	0.0124979	0.227861
							BG	0.00407117	0.00300679	0.000169351	0.0173998
	antlathla	ACSC	Included	SymbiaT2	BW O3_0.5	2-32	MYO-Norm	0.219855	0.0538409	0.043427	0.340116	35.5289	2.14094	96.317	1.08651
							MYO-Def	0.104585	0.0409707	0.00350983	0.274192
							BG	0.00210087	0.00228262	-0.00072192	0.0162336
	antlathla	ACSC	Included	SymbiaT2	BW O3_0.5	4-4	MYO-Norm	0.173882	0.041132	0.0503277	0.256501	32.2968	2.06403	36.9826	0.56277
							MYO-Def	0.0889845	0.027942	0.0238035	0.213844
							BG	0.00835461	0.00470172	0.00225401	0.0229009
	antlathla	ACSC	Included	SymbiaT2	BW O3_0.5	4-6	MYO-Norm	0.195833	0.0409147	0.050127	0.26469	33.6004	2.40754	52.3573	0.648235
							MYO-Def	0.0973292	0.0318633	0.0168679	0.21531
							BG	0.00577001	0.00374032	0.00103335	0.0195656
	antlathla	ACSC	Included	SymbiaT2	BW O3_0.5	4-8	MYO-Norm	0.208984	0.043759	0.047779	0.28688	34.3417	2.44167	65.2681	0.742253
							MYO-Def	0.102139	0.0350238	0.012688	0.233452
							BG	0.0043138	0.00320193	0.00017078	0.0182903
	antlathla	ACSC	Included	SymbiaT2	BW O3_0.5	4-12	MYO-Norm	0.223625	0.0501166	0.0454095	0.330363	34.8613	2.30688	83.7042	0.932239
							MYO-Def	0.108012	0.0394611	0.00767041	0.263385
							BG	0.0028658	0.00267161	-0.000531974	0.0172759
	antlathla	ACSC	Included	SymbiaT2	BW O3_0.5	8-4	MYO-Norm	0.220854	0.0459838	0.0492085	0.301173	32.1858	2.33889	69.1872	0.686894
							MYO-Def	0.113303	0.0376508	0.0122251	0.248949
							BG	0.00464718	0.00319212	7.67786e-05	0.0177653
	antlathla	ACSC	Included	SymbiaT2	BW O3_0.5	8-6	MYO-Norm	0.235565	0.0513699	0.0480741	0.34952	32.4236	2.24558	86.0864	0.926377
							MYO-Def	0.12021	0.0423181	0.00748751	0.280065
							BG	0.00295385	0.00273638	-0.000681673	0.0156143
	antlathla	ACSC	Included	SymbiaT2	BW O3_0.5	16-2	MYO-Norm	0.291822	0.0638189	0.0895063	0.453957	40.0345	2.61455	101.171	0.473244
							MYO-Def	0.124964	0.0695753	0.0111529	0.344622
							BG	0.00609504	0.00288444	0.00126707	0.015131
3	antlathla	ACSC	Not Included	SymbiaT2	BW O3_0.5	2-4	MYO-Norm	0.0688765	0.0231366	0.0271661	0.121608	28.5327	1.32169	23.394	0.349517
							MYO-Def	0.038297	0.0121355	0.0199259	0.0947992
							BG	0.0084236	0.00294419	0.00206943	0.0158833
	antlathla	ACSC	Not Included	SymbiaT2	BW O3_0.5	2-6	MYO-Norm	0.0938185	0.0286469	0.0256258	0.15412	30.6034	1.53482	32.4778	0.437084
							MYO-Def	0.0498508	0.0154285	0.0216481	0.117816
							BG	0.00660903	0.0028887	0.00160548	0.0150993
	antlathla	ACSC	Not Included	SymbiaT2	BW O3_0.5	2-8	MYO-Norm	0.107756	0.0279493	0.022108	0.160826	31.1377	1.83088	40.7286	0.506735
							MYO-Def	0.0565842	0.0170413	0.0207932	0.123859
							BG	0.00522109	0.00264571	0.00125309	0.0138007
	antlathla	ACSC	Not Included	SymbiaT2	BW O3_0.5	2-16	MYO-Norm	0.13499	0.0285847	0.0142264	0.18436	32.8	2.33278	66.0447	0.765748
							MYO-Def	0.0683082	0.0224813	0.0149695	0.163108
							BG	0.00266918	0.00204392	0.000366402	0.011043
	antlathla	ACSC	Not Included	SymbiaT2	BW O3_0.5	2-32	MYO-Norm	0.153083	0.0372252	0.00815036	0.231745	33.7991	2.07765	95.285	1.18474
							MYO-Def	0.0757421	0.0279831	0.00909825	0.207548
							BG	0.00135606	0.00160658	-0.00025688	0.00975244
	antlathla	ACSC	Not Included	SymbiaT2	BW O3_0.5	4-4	MYO-Norm	0.11042	0.0292266	0.0223641	0.167822	31.2723	1.80006	40.7194	0.503909
							MYO-Def	0.0578105	0.0176638	0.0211131	0.129416
							BG	0.00538139	0.00271173	0.00130586	0.0141602
	antlathla	ACSC	Not Included	SymbiaT2	BW O3_0.5	4-6	MYO-Norm	0.127762	0.0279106	0.0174558	0.172348	32.1387	2.2267	54.6898	0.63281
							MYO-Def	0.0656136	0.0204487	0.0179272	0.141102
							BG	0.00369166	0.00233612	0.000697097	0.0123999
	antlathla	ACSC	Not Included	SymbiaT2	BW O3_0.5	4-8	MYO-Norm	0.138121	0.0291054	0.0143748	0.18771	32.817	2.3451	65.6275	0.762292
							MYO-Def	0.0698659	0.022767	0.0151675	0.162825
							BG	0.00276091	0.00210462	0.000360326	0.0113934
	antlathla	ACSC	Not Included	SymbiaT2	BW O3_0.5	4-12	MYO-Norm	0.149888	0.0334144	0.0105903	0.21139	33.484	2.25046	82.1768	0.998156
							MYO-Def	0.0746903	0.0259866	0.0116376	0.189412
							BG	0.00182734	0.00182397	-0.000105737	0.0104566
	antlathla	ACSC	Not Included	SymbiaT2	BW O3_0.5	8-4	MYO-Norm	0.148256	0.032109	0.0147026	0.200249	31.0541	2.18818	69.8942	0.718561
							MYO-Def	0.0779956	0.0246349	0.0173198	0.173731
							BG	0.00295194	0.00212115	0.000388225	0.0123336
	antlathla	ACSC	Not Included	SymbiaT2	BW O3_0.5	8-6	MYO-Norm	0.160533	0.0354415	0.0108381	0.228652	31.5504	2.17268	87.6358	0.962095
							MYO-Def	0.0835301	0.0279373	0.0137508	0.20285
							BG	0.00190399	0.00183182	-0.000134112	0.0111696
	antlathla	ACSC	Not Included	SymbiaT2	BW O3_0.5	16-2	MYO-Norm	0.1997	0.0452794	0.0298053	0.322236	35.254	2.29914	77.5621	0.606786
							MYO-Def	0.0955963	0.053802	0.00910333	0.275964
							BG	0.00424319	0.00257471	0.000597478	0.0152773
3	antlathla	ACSC	Included	SymbiaT2	BW O3_0.5	2-4	MYO-Norm	0.107575	0.0336223	0.034007	0.176087	30.5141	1.49609	23.1552	0.392486
							MYO-Def	0.0572731	0.016997	0.0313021	0.133266
							BG	0.0118369	0.00464582	0.00316944	0.0207795
	antlathla	ACSC	Included	SymbiaT2	BW O3_0.5	2-6	MYO-Norm	0.133751	0.0358859	0.0289222	0.200085	31.8159	1.7992	31.5016	0.456658
							MYO-Def	0.069185	0.0200126	0.03162	0.152157
							BG	0.00929765	0.00424585	0.00265503	0.0194282
	antlathla	ACSC	Included	SymbiaT2	BW O3_0.5	2-8	MYO-Norm	0.149464	0.0346709	0.024246	0.209039	32.6255	2.12095	39.9112	0.496814
							MYO-Def	0.0759286	0.0218906	0.0294547	0.157307
							BG	0.00753785	0.00374491	0.00208126	0.0177774
	antlathla	ACSC	Included	SymbiaT2	BW O3_0.5	2-16	MYO-Norm	0.182436	0.0389104	0.0143367	0.257527	34.9231	2.42717	66.428	0.662979
							MYO-Def	0.0879937	0.0282199	0.0209881	0.216377
							BG	0.00414247	0.00274637	0.000220506	0.0139056
	antlathla	ACSC	Included	SymbiaT2	BW O3_0.5	2-32	MYO-Norm	0.204715	0.0508158	0.00697038	0.305956	35.7077	2.12001	82.3491	0.983063
							MYO-Def	0.0969848	0.0351609	0.00946427	0.268887
							BG	0.00252877	0.00248594	-0.000744052	0.0133031
	antlathla	ACSC	Included	SymbiaT2	BW O3_0.5	4-4	MYO-Norm	0.156845	0.0362327	0.0252489	0.220787	32.3473	2.11604	39.4708	0.501801
							MYO-Def	0.0801753	0.0237638	0.0325692	0.171165
							BG	0.00791887	0.0039737	0.00213861	0.018985
	antlathla	ACSC	Included	SymbiaT2	BW O3_0.5	4-6	MYO-Norm	0.17857	0.036431	0.0189109	0.243793	33.7632	2.47443	54.6925	0.579499
							MYO-Def	0.0884242	0.0268873	0.0263592	0.193473
							BG	0.00563414	0.00326498	0.000941211	0.0162141
	antlathla	ACSC	Included	SymbiaT2	BW O3_0.5	4-8	MYO-Norm	0.191962	0.039718	0.0149785	0.267873	34.59	2.48425	65.9695	0.667874
							MYO-Def	0.0932924	0.0295767	0.0222413	0.222094
							BG	0.0043569	0.00290986	0.000187991	0.0145562
	antlathla	ACSC	Included	SymbiaT2	BW O3_0.5	4-12	MYO-Norm	0.207138	0.046643	0.0102416	0.295897	35.1734	2.31114	78.5292	0.843417
							MYO-Def	0.0993394	0.0335526	0.0150323	0.255945
							BG	0.00312742	0.00263772	-0.000413306	0.0139384
	antlathla	ACSC	Included	SymbiaT2	BW O3_0.5	8-4	MYO-Norm	0.201931	0.0407679	0.0149819	0.273645	31.866	2.39392	69.3394	0.604685
							MYO-Def	0.104336	0.0313519	0.0229661	0.232886
							BG	0.00481608	0.00291221	0.000180537	0.0154477
	antlathla	ACSC	Included	SymbiaT2	BW O3_0.5	8-6	MYO-Norm	0.217384	0.0462477	0.0104603	0.314425	32.2842	2.2943	77.1139	0.830062
							MYO-Def	0.111278	0.0352863	0.0173085	0.268004
							BG	0.00339613	0.002819	-0.000435323	0.0153436
	antlathla	ACSC	Included	SymbiaT2	BW O3_0.5	16-2	MYO-Norm	0.275083	0.0607622	0.0343712	0.426083	39.6371	2.57017	92.0638	0.436832
							MYO-Def	0.118914	0.0661397	0.0167515	0.322
							BG	0.00684007	0.00298796	0.0011646	0.0155676
2	antlathla	ACSC	Not Included	SymbiaT2	BW O3_0.5	2-4	MYO-Norm	0.0549852	0.0174957	0.0230326	0.0919067	26.5027	1.31684	19.8173	0.314111
							MYO-Def	0.0319461	0.00965575	0.0183961	0.0720769
							BG	0.00883322	0.00277461	0.00226647	0.0156932
	antlathla	ACSC	Not Included	SymbiaT2	BW O3_0.5	2-6	MYO-Norm	0.075976	0.0232271	0.0275926	0.119917	29.1055	1.47483	25.5412	0.407518
							MYO-Def	0.04172	0.0126269	0.0223964	0.0923693
							BG	0.00729944	0.00297465	0.00181151	0.0151569
	antlathla	ACSC	Not Included	SymbiaT2	BW O3_0.5	2-8	MYO-Norm	0.0884308	0.0236511	0.0304093	0.130533	29.9057	1.72151	30.5274	0.483069
							MYO-Def	0.0477153	0.0142125	0.024099	0.0986153
							BG	0.0059966	0.00289677	0.00149754	0.0145584
	antlathla	ACSC	Not Included	SymbiaT2	BW O3_0.5	2-16	MYO-Norm	0.114713	0.0249232	0.0259866	0.178976	32.1048	2.23712	46.5809	0.720436
							MYO-Def	0.0589567	0.0195062	0.0176012	0.135508
							BG	0.00341829	0.00246266	0.000503413	0.0121092
	antlathla	ACSC	Not Included	SymbiaT2	BW O3_0.5	2-32	MYO-Norm	0.13302	0.0329614	0.0220203	0.212956	33.383	2.02007	64.2779	1.04753
							MYO-Def	0.0664357	0.0248895	0.00878086	0.185806
							BG	0.00197555	0.00206945	-0.000277002	0.0105842
	antlathla	ACSC	Not Included	SymbiaT2	BW O3_0.5	4-4	MYO-Norm	0.0906063	0.0247123	0.0300923	0.13366	30.0664	1.69509	30.6319	0.479838
							MYO-Def	0.0487168	0.014828	0.0245975	0.10359
							BG	0.00616439	0.00295791	0.00149656	0.0150635
	antlathla	ACSC	Not Included	SymbiaT2	BW O3_0.5	4-6	MYO-Norm	0.107039	0.0242335	0.0288085	0.162483	31.2786	2.10479	39.4139	0.604667
							MYO-Def	0.0560325	0.0175246	0.0217485	0.113586
							BG	0.00449135	0.00271577	0.000906305	0.0136594
	antlathla	ACSC	Not Included	SymbiaT2	BW O3_0.5	4-8	MYO-Norm	0.117378	0.025337	0.026828	0.181082	32.2059	2.25707	46.3752	0.717935
							MYO-Def	0.0601905	0.0197957	0.0180997	0.136375
							BG	0.00352546	0.00253105	0.00051649	0.0125541
	antlathla	ACSC	Not Included	SymbiaT2	BW O3_0.5	4-12	MYO-Norm	0.129325	0.0293413	0.0244474	0.202692	33.1212	2.19327	56.4842	0.909101
							MYO-Def	0.0649716	0.0229343	0.0126965	0.16698
							BG	0.00251851	0.00228958	-5.38212e-05	0.0114423
	antlathla	ACSC	Not Included	SymbiaT2	BW O3_0.5	8-4	MYO-Norm	0.125613	0.0282996	0.027413	0.190857	30.1871	2.05844	48.0744	0.708607
							MYO-Def	0.0673601	0.0209552	0.0207867	0.141302
							BG	0.00368736	0.00261289	0.000540317	0.0135545
	antlathla	ACSC	Not Included	SymbiaT2	BW O3_0.5	8-6	MYO-Norm	0.138108	0.0310434	0.0232073	0.213641	30.9765	2.10435	58.9366	0.913593
							MYO-Def	0.0727817	0.0239414	0.0155698	0.172901
							BG	0.00256496	0.00234333	-7.20097e-05	0.0125125
	antlathla	ACSC	Not Included	SymbiaT2	BW O3_0.5	16-2	MYO-Norm	0.174511	0.0387531	0.0454397	0.271594	35.0249	2.3362	52.2962	0.625813
							MYO-Def	0.0839762	0.0494058	0.00932875	0.223492
							BG	0.00533222	0.00333697	0.000863806	0.0191093
2	antlathla	ACSC	Included	SymbiaT2	BW O3_0.5	2-4	MYO-Norm	0.089688	0.0271411	0.0377879	0.1411	28.9339	1.48312	20.2939	0.350772
							MYO-Def	0.0494345	0.0144878	0.0283732	0.112806
							BG	0.0125992	0.00441945	0.00350577	0.022316
	antlathla	ACSC	Included	SymbiaT2	BW O3_0.5	2-6	MYO-Norm	0.112846	0.0303354	0.0373739	0.169398	30.6267	1.74435	25.5654	0.425886
							MYO-Def	0.0599303	0.0176649	0.0311173	0.132025
							BG	0.0103643	0.00441401	0.00274525	0.0218882
	antlathla	ACSC	Included	SymbiaT2	BW O3_0.5	2-8	MYO-Norm	0.127424	0.0297534	0.0333921	0.181602	31.6526	2.05932	30.7486	0.474958
							MYO-Def	0.0661521	0.0196703	0.0291531	0.138002
							BG	0.00872511	0.00414406	0.00205363	0.0208261
	antlathla	ACSC	Included	SymbiaT2	BW O3_0.5	2-16	MYO-Norm	0.159981	0.0324573	0.024165	0.236802	34.557	2.53172	45.592	0.648814
							MYO-Def	0.0778082	0.0258179	0.0181872	0.16666
							BG	0.00540828	0.00350897	0.000295421	0.0179375
	antlathla	ACSC	Included	SymbiaT2	BW O3_0.5	2-32	MYO-Norm	0.182706	0.0425574	0.0160409	0.279587	35.6253	2.25541	51.119	0.93293
							MYO-Def	0.0867217	0.0320463	0.0077609	0.220077
							BG	0.00383108	0.00357413	-0.000634985	0.0187455
	antlathla	ACSC	Included	SymbiaT2	BW O3_0.5	4-4	MYO-Norm	0.133015	0.0313414	0.0348398	0.189319	31.2865	2.02278	30.3174	0.480118
							MYO-Def	0.0696182	0.021094	0.0305902	0.149874
							BG	0.00913819	0.00438741	0.00212646	0.0219399
	antlathla	ACSC	Included	SymbiaT2	BW O3_0.5	4-6	MYO-Norm	0.15387	0.030612	0.029184	0.220363	33.0403	2.49662	39.1389	0.565907
							MYO-Def	0.0774434	0.0243913	0.0255867	0.153536
							BG	0.00694704	0.00393138	0.00107059	0.0199958
	antlathla	ACSC	Included	SymbiaT2	BW O3_0.5	4-8	MYO-Norm	0.167292	0.0327776	0.0254221	0.244825	34.1571	2.59893	44.9825	0.653289
							MYO-Def	0.0821052	0.0270661	0.0201286	0.174232
							BG	0.00569281	0.00371905	0.000254366	0.0188709
	antlathla	ACSC	Included	SymbiaT2	BW O3_0.5	4-12	MYO-Norm	0.182726	0.0384837	0.0204732	0.273629	35.0326	2.4637	50.0798	0.81182
							MYO-Def	0.0879138	0.0307974	0.0129236	0.208973
							BG	0.00449447	0.0036487	-0.000415201	0.0191458
	antlathla	ACSC	Included	SymbiaT2	BW O3_0.5	8-4	MYO-Norm	0.174631	0.0341407	0.0262481	0.248504	30.418	2.38601	47.1236	0.613261
							MYO-Def	0.093171	0.0281831	0.0239885	0.181583
							BG	0.00604279	0.00370581	0.000262725	0.0204793
	antlathla	ACSC	Included	SymbiaT2	BW O3_0.5	8-6	MYO-Norm	0.190389	0.0376703	0.0215121	0.27514	31.1791	2.40255	49.3068	0.825087
							MYO-Def	0.0998844	0.0315802	0.0166634	0.218284
							BG	0.00467988	0.00386131	-0.000466622	0.0215309
	antlathla	ACSC	Included	SymbiaT2	BW O3_0.5	16-2	MYO-Norm	0.247838	0.0543315	0.0579016	0.383097	39.0513	2.56216	58.8038	0.473513
							MYO-Def	0.108632	0.0626371	0.0120357	0.297856
							BG	0.00890083	0.00421466	0.00158642	0.0245738
1	antlathla	ACSC	Not Included	SymbiaT2	BW O3_0.5	2-4	MYO-Norm	0.0394296	0.0123527	0.0183278	0.0614276	24.4686	1.25499	15.6818	0.276443
							MYO-Def	0.0239271	0.00737686	0.0125485	0.0535699
							BG	0.00909539	0.00251436	0.00284272	0.016352
	antlathla	ACSC	Not Included	SymbiaT2	BW O3_0.5	2-6	MYO-Norm	0.0543424	0.0179951	0.0211893	0.0854309	27.4732	1.30168	18.2449	0.364464
							MYO-Def	0.0309185	0.00990249	0.0143617	0.0706435
							BG	0.00817228	0.0029785	0.00234316	0.0175767
	antlathla	ACSC	Not Included	SymbiaT2	BW O3_0.5	2-8	MYO-Norm	0.0637194	0.0201321	0.0205319	0.101695	28.5504	1.40589	20.1984	0.43961
							MYO-Def	0.0354159	0.0112926	0.0153422	0.0782252
							BG	0.00717608	0.00315468	0.00180883	0.0175816
	antlathla	ACSC	Not Included	SymbiaT2	BW O3_0.5	2-16	MYO-Norm	0.0856627	0.0239137	0.0160517	0.14107	31.2752	1.70684	26.532	0.659007
							MYO-Def	0.0448459	0.015214	0.013425	0.094264
							BG	0.00489928	0.00322866	0.00072311	0.0174591
	antlathla	ACSC	Not Included	SymbiaT2	BW O3_0.5	2-32	MYO-Norm	0.10295	0.0296762	0.0113669	0.168331	32.9817	1.7208	32.4689	0.947527
							MYO-Def	0.0518833	0.0190682	0.0087571	0.118711
							BG	0.00334632	0.00317073	-0.000239694	0.016911
	antlathla	ACSC	Not Included	SymbiaT2	BW O3_0.5	4-4	MYO-Norm	0.0653788	0.0210668	0.0209247	0.103771	28.9871	1.39485	20.2717	0.438714
							MYO-Def	0.0359938	0.011766	0.0155586	0.0815201
							BG	0.00735131	0.00322512	0.00189957	0.0181784
	antlathla	ACSC	Not Included	SymbiaT2	BW O3_0.5	4-6	MYO-Norm	0.0786144	0.0229767	0.0183491	0.128873	30.4502	1.59731	23.7514	0.557392
							MYO-Def	0.0419134	0.013871	0.0156543	0.0911225
							BG	0.00593817	0.00330989	0.0012126	0.0180654
	antlathla	ACSC	Not Included	SymbiaT2	BW O3_0.5	4-8	MYO-Norm	0.0876792	0.024395	0.0164328	0.143552	31.5787	1.72518	26.4398	0.658433
							MYO-Def	0.0455934	0.0155498	0.0135912	0.0977468
							BG	0.00503647	0.00331618	0.000727537	0.0180283
	antlathla	ACSC	Not Included	SymbiaT2	BW O3_0.5	4-12	MYO-Norm	0.0988454	0.0272545	0.0136981	0.160774	32.7892	1.79108	29.9571	0.824804
							MYO-Def	0.0500303	0.0178374	0.0107394	0.106192
							BG	0.00400043	0.00329957	0.000112255	0.0178089
	antlathla	ACSC	Not Included	SymbiaT2	BW O3_0.5	8-4	MYO-Norm	0.0938627	0.0273542	0.0165906	0.15137	29.3678	1.55792	26.9757	0.675751
							MYO-Def	0.0512471	0.0162099	0.0150288	0.112758
							BG	0.00514913	0.00347953	0.0007805	0.0193733
	antlathla	ACSC	Not Included	SymbiaT2	BW O3_0.5	8-6	MYO-Norm	0.105421	0.0294233	0.0139082	0.169102	30.3545	1.66864	30.7603	0.85797
							MYO-Def	0.0563241	0.0179358	0.0118498	0.121394
							BG	0.00399452	0.00342718	0.000112105	0.0188441
	antlathla	ACSC	Not Included	SymbiaT2	BW O3_0.5	16-2	MYO-Norm	0.138486	0.0311636	0.0359202	0.233828	35.3381	2.32066	29.3408	0.644435
							MYO-Def	0.0661659	0.039821	0.00783592	0.207675
							BG	0.0073241	0.00471991	0.00111643	0.0282096
1	antlathla	ACSC	Included	SymbiaT2	BW O3_0.5	2-4	MYO-Norm	0.0651154	0.0198325	0.0263504	0.0965087	26.4324	1.37282	16.3707	0.303239
							MYO-Def	0.0378889	0.0106871	0.021926	0.0815548
							BG	0.0131169	0.00397755	0.00389714	0.0229233
	antlathla	ACSC	Included	SymbiaT2	BW O3_0.5	2-6	MYO-Norm	0.0824046	0.0254505	0.0237526	0.129664	28.6439	1.44188	18.575	0.383301
							MYO-Def	0.0457081	0.0136056	0.0227093	0.10038
							BG	0.011574	0.00443632	0.00303509	0.0230007
	antlathla	ACSC	Included	SymbiaT2	BW O3_0.5	2-8	MYO-Norm	0.0940207	0.0280587	0.0209555	0.153812	30.0275	1.54764	20.8309	0.438901
							MYO-Def	0.0505959	0.0154604	0.0192114	0.110357
							BG	0.0102837	0.00451353	0.00248681	0.0225854
	antlathla	ACSC	Included	SymbiaT2	BW O3_0.5	2-16	MYO-Norm	0.123017	0.0348163	0.0136844	0.205196	33.9156	1.7897	27.5978	0.607259
							MYO-Def	0.0607062	0.020329	0.011908	0.129723
							BG	0.00734035	0.00445749	0.000689324	0.0216805
	antlathla	ACSC	Included	SymbiaT2	BW O3_0.5	2-32	MYO-Norm	0.145643	0.0437824	0.00691605	0.240323	35.6955	1.75012	29.6499	0.856572
							MYO-Def	0.0690185	0.024818	0.00621093	0.140859
							BG	0.00573459	0.00491209	-0.000538304	0.0216596
	antlathla	ACSC	Included	SymbiaT2	BW O3_0.5	4-4	MYO-Norm	0.0974052	0.029174	0.021901	0.158339	29.6862	1.52854	20.7603	0.44031
							MYO-Def	0.0528115	0.0164658	0.0197211	0.117808
							BG	0.0106559	0.0046919	0.00251801	0.0232001
	antlathla	ACSC	Included	SymbiaT2	BW O3_0.5	4-6	MYO-Norm	0.115012	0.0322541	0.0176352	0.190684	31.8999	1.72478	24.7633	0.527219
							MYO-Def	0.0593808	0.0192487	0.0150835	0.13054
							BG	0.00880936	0.00464446	0.00133442	0.0225041
	antlathla	ACSC	Included	SymbiaT2	BW O3_0.5	4-8	MYO-Norm	0.127396	0.0351297	0.01454	0.210724	33.4435	1.81772	27.4025	0.606242
							MYO-Def	0.0635402	0.0213176	0.0121906	0.138133
							BG	0.00766867	0.00464907	0.000629985	0.022195
	antlathla	ACSC	Not Included	SymbiaT2	BW O3_0.5	4-12	MYO-Norm	0.1425	0.040267	0.0104182	0.233569	34.8583	1.82946	29.3963	0.74322
							MYO-Def	0.068833	0.0240573	0.00854443	0.146255
							BG	0.00652236	0.00484755	-0.000159526	0.0221148
	antlathla	ACSC	Included	SymbiaT2	BW O3_0.5	8-4	MYO-Norm	0.133168	0.0353614	0.0152455	0.210868	29.1636	1.7006	27.9051	0.609016
							MYO-Def	0.0730325	0.0213124	0.0133868	0.158601
							BG	0.00783587	0.00477217	0.000624385	0.0233248
	antlathla	ACSC	Included	SymbiaT2	BW O3_0.5	8-6	MYO-Norm	0.148558	0.0389039	0.0113111	0.233633	30.3285	1.77723	28.3651	0.797864
							MYO-Def	0.0794167	0.0231899	0.00950108	0.167802
							BG	0.00656421	0.00523735	-0.000153398	0.0232398
	antlathla	ACSC	Included	SymbiaT2	BW O3_0.5	16-2	MYO-Norm	0.20246	0.0420216	0.0431994	0.304954	39.2486	2.716	30.8654	0.531753
							MYO-Def	0.0883292	0.049019	0.0158427	0.263872
							BG	0.0123355	0.00655944	0.00262797	0.0311788

## Sheet: Hawkeye4 (FH)
Frame	IMG	Correction(s)	Poission Noise	CAM	Filter	SU-IT	ROI	Mean	SD	Min	Max	Contrast (%)	CNR	SNR	NBR												BG ROI:	Freehand
8	antlathla	ACSC	Not Included	Hawkeye4	BW O3_0.5	2-4	MYO-Norm	0.0405417	0.016275	0.0153062	0.0742804	26.1904	1.03402	15.0674	7.23677
							MYO-Def	0.0237131	0.00796427	0.0121257	0.0572921
							BG	0.00760911	0.00269069	0.00224893	0.0135773
	antlathla	ACSC	Not Included	Hawkeye4	BW O3_0.5	2-6	MYO-Norm	0.055685	0.022452	0.0182634	0.100619	28.2367	1.09223	18.7273	11.0764
							MYO-Def	0.0311622	0.0109836	0.0133604	0.0752549
							BG	0.00677813	0.00297346	0.00202701	0.0146124
	antlathla	ACSC	Not Included	Hawkeye4	BW O3_0.5	2-8	MYO-Norm	0.0644856	0.0234596	0.0198944	0.109169	28.389	1.21561	21.431	0.504087
							MYO-Def	0.0359679	0.0124653	0.013375	0.0820828
							BG	0.00596919	0.00300899	0.00158153	0.0152655
	antlathla	ACSC	Not Included	Hawkeye4	BW O3_0.5	2-16	MYO-Norm	0.0836243	0.0222368	0.0205763	0.125093	29.5645	1.71623	28.8172	0.693275
							MYO-Def	0.0454609	0.0158768	0.0110071	0.0928611
							BG	0.00418577	0.00290189	0.000446548	0.0132787
	antlathla	ACSC	Not Included	Hawkeye4	BW O3_0.5	2-32	MYO-Norm	0.0977075	0.0239257	0.0179968	0.1471	30.4821	1.90804	32.2925	0.98416
							MYO-Def	0.0520563	0.0190883	0.00642264	0.129493
							BG	0.0030744	0.0030257	-0.00029194	0.011264
	antlathla	ACSC	Not Included	Hawkeye4	BW O3_0.5	4-4	MYO-Norm	0.0661396	0.0247084	0.0197101	0.114432	28.7918	1.19682	21.3612	0.502645
							MYO-Def	0.0365682	0.0129294	0.0134757	0.0855502
							BG	0.00615991	0.00309625	0.00159051	0.0154086
	antlathla	ACSC	Not Included	Hawkeye4	BW O3_0.5	4-6	MYO-Norm	0.0778291	0.0238642	0.0216206	0.119708	29.224	1.4751	25.5512	0.604053
							MYO-Def	0.042627	0.014759	0.0123412	0.0923606
							BG	0.0050426	0.003046	0.000855584	0.0147412
	antlathla	ACSC	Not Included	Hawkeye4	BW O3_0.5	4-8	MYO-Norm	0.0855179	0.0230827	0.0214194	0.127619	29.8515	1.70341	28.3214	0.694619
							MYO-Def	0.0461986	0.0161082	0.0110312	0.0962377
							BG	0.00434706	0.00301955	0.000444501	0.0132181
	antlathla	ACSC	Not Included	Hawkeye4	BW O3_0.5	4-12	MYO-Norm	0.0946898	0.0231674	0.0198685	0.141917	30.5501	1.91289	30.8081	0.857185
							MYO-Def	0.050373	0.0179296	0.00840958	0.114866
							BG	0.00358562	0.00307354	4.75564e-05	0.0117826
	antlathla	ACSC	Not Included	Hawkeye4	BW O3_0.5	8-4	MYO-Norm	0.0912261	0.0268	0.0190096	0.138528	28.2133	1.49808	29.2797	0.687659
							MYO-Def	0.0510776	0.0165334	0.0125967	0.108488
							BG	0.00453085	0.00311568	0.000500396	0.0127953
	antlathla	ACSC	Not Included	Hawkeye4	BW O3_0.5	8-6	MYO-Norm	0.100643	0.0262936	0.0180659	0.149347	28.732	1.70861	31.4887	0.869081												done
							MYO-Def	0.0557175	0.0177182	0.0102975	0.114248
							BG	0.00367763	0.00319616	2.9685e-05	0.0125287
	antlathla	ACSC	Not Included	Hawkeye4	BW O3_0.5	16-2	MYO-Norm	0.1298	0.0294949	0.0418429	0.217969	35.7062	2.3158	32.825	0.609628
							MYO-Def	0.0614956	0.0370143	0.00584879	0.18338
							BG	0.00648641	0.0039543	0.00087633	0.0185988
8	antlathla	ACSC	Included	Hawkeye4	BW O3_0.5	2-4	MYO-Norm	0.0677042	0.0261387	0.0265108	0.116651	27.6141	1.12097	15.5608	0.391635
							MYO-Def	0.0384035	0.0125203	0.0200883	0.089693
							BG	0.0111097	0.00435095	0.00330587	0.0210368
	antlathla	ACSC	Included	Hawkeye4	BW O3_0.5	2-6	MYO-Norm	0.0845786	0.0304274	0.0293245	0.138044	28.5533	1.2348	18.791	0.457045
							MYO-Def	0.0470067	0.0158001	0.0206365	0.108286
							BG	0.00984808	0.00450102	0.00282589	0.0234396
	antlathla	ACSC	Included	Hawkeye4	BW O3_0.5	2-8	MYO-Norm	0.0950961	0.0303358	0.0274019	0.143227	29.1566	1.41533	21.4465	0.50069
							MYO-Def	0.0521609	0.0173648	0.0198085	0.115857
							BG	0.00885597	0.0044341	0.00233603	0.0237763
	antlathla	ACSC	Included	Hawkeye4	BW O3_0.5	2-16	MYO-Norm	0.120116	0.0287355	0.0207288	0.181592	31.8347	2.01875	27.3464	0.646841
							MYO-Def	0.0621062	0.0206287	0.0154367	0.125764
							BG	0.00679052	0.00439239	0.000962918	0.0195893
	antlathla	ACSC	Included	Hawkeye4	BW O3_0.5	2-32	MYO-Norm	0.138754	0.033274	0.015893	0.21054	33.0216	2.07036	26.311	0.865615
							MYO-Def	0.0698647	0.0241122	0.00858772	0.163389
							BG	0.00609233	0.00527361	-0.000235495	0.0189669
	antlathla	ACSC	Included	Hawkeye4	BW O3_0.5	4-4	MYO-Norm	0.0979522	0.0319652	0.0281145	0.150983	28.8736	1.37311	21.3283	0.501356
							MYO-Def	0.0540606	0.0183341	0.0201917	0.123039
							BG	0.00916034	0.00459259	0.00244909	0.02431
	antlathla	ACSC	Included	Hawkeye4	BW O3_0.5	4-6	MYO-Norm	0.113065	0.0300423	0.0239416	0.169565	30.3151	1.75101	24.871	0.580306
							MYO-Def	0.0604605	0.0200198	0.0176666	0.130811
							BG	0.0078339	0.00454606	0.00159103	0.0225066
	antlathla	ACSC	Included	Hawkeye4	BW O3_0.5	4-8	MYO-Norm	0.123421	0.0293483	0.0214303	0.185737	31.427	2.0112	26.5616	0.65538
							MYO-Def	0.0643958	0.021268	0.0155195	0.134143
							BG	0.00708992	0.00464659	0.000964603	0.0198985
	antlathla	ACSC	Included	Hawkeye4	BW O3_0.5	4-12	MYO-Norm	0.13578	0.030892	0.0184209	0.20455	32.3969	2.15102	26.6946	0.78306
							MYO-Def	0.0693306	0.0231845	0.0109673	0.14919
							BG	0.00649557	0.00508642	0.000161334	0.0197746
	antlathla	ACSC	Included	Hawkeye4	BW O3_0.5	8-4	MYO-Norm	0.129246	0.0321602	0.0223088	0.193746	27.8214	1.74946	26.2792	0.64947
							MYO-Def	0.072983	0.0205369	0.0190793	0.149152
							BG	0.00757261	0.00491818	0.00102455	0.0196291
	antlathla	ACSC	Included	Hawkeye4	BW O3_0.5	8-6	MYO-Norm	0.141857	0.0328842	0.0195492	0.217176	28.6267	1.92014	25.0222	0.823851
							MYO-Def	0.0787146	0.0217207	0.015052	0.15076
							BG	0.00688139	0.00566924	0.000113438	0.0200357
	antlathla	ACSC	Included	Hawkeye4	BW O3_0.5	16-2	MYO-Norm	0.193373	0.0373018	0.0485218	0.295807	38.659	2.89067	28.6038	0.61251
							MYO-Def	0.0855457	0.0466254	0.0127497	0.227809
							BG	0.0110372	0.00676039	0.000968221	0.0305547
7	antlathla	ACSC	Not Included	Hawkeye4	BW O3_0.5	2-4	MYO-Norm	0.0452082	0.0168679	0.0174179	0.0799917	26.8648	1.13508	16.6138	0.367454
							MYO-Def	0.0260617	0.00857829	0.0129728	0.0630798
							BG	0.00740533	0.00272112	0.00207089	0.0133956
	antlathla	ACSC	Not Included	Hawkeye4	BW O3_0.5	2-6	MYO-Norm	0.0622822	0.0222838	0.0217968	0.107735	29.0987	1.25996	21.4828	0.45518
							MYO-Def	0.0342055	0.0114831	0.0136897	0.0817468
							BG	0.00636926	0.00289916	0.00182444	0.0130753
	antlathla	ACSC	Not Included	Hawkeye4	BW O3_0.5	2-8	MYO-Norm	0.0722956	0.0223852	0.024283	0.115628	29.5367	1.47282	25.4803	0.52073
							MYO-Def	0.0393262	0.0129446	0.0129485	0.0884691
							BG	0.00544872	0.00283731	0.00156013	0.012864
	antlathla	ACSC	Not Included	Hawkeye4	BW O3_0.5	2-16	MYO-Norm	0.0939875	0.0206465	0.0235191	0.134321	31.3507	2.17305	37.4778	0.712125
							MYO-Def	0.0491217	0.01689	0.00820405	0.101661
							BG	0.0035216	0.00250782	0.000538116	0.0115807
	antlathla	ACSC	Not Included	Hawkeye4	BW O3_0.5	2-32	MYO-Norm	0.109664	0.0251443	0.0188849	0.166492	32.6018	2.1446	46.3641	0.989591
							MYO-Def	0.0557395	0.0202868	0.00305225	0.133584
							BG	0.00239016	0.00236528	-0.00046123	0.0109365
	antlathla	ACSC	Not Included	Hawkeye4	BW O3_0.5	4-4	MYO-Norm	0.0741446	0.0235721	0.024537	0.120506	29.8859	1.44749	25.5485	0.518103
							MYO-Def	0.0400242	0.0134396	0.0129889	0.0924582
							BG	0.00560142	0.00290211	0.00159163	0.0133395
	antlathla	ACSC	Not Included	Hawkeye4	BW O3_0.5	4-6	MYO-Norm	0.087491	0.0218548	0.0254577	0.125678	30.7436	1.8827	32.1948	0.620646
							MYO-Def	0.046345	0.0155317	0.0105017	0.0992585
							BG	0.00437858	0.00271755	0.00105991	0.0125911
	antlathla	ACSC	Not Included	Hawkeye4	BW O3_0.5	4-8	MYO-Norm	0.0961371	0.0213383	0.0240448	0.13686	31.5943	2.16338	37.0284	0.712798
							MYO-Def	0.0499742	0.0171202	0.00818284	0.10315
							BG	0.00364242	0.00259631	0.000571827	0.0120506
	antlathla	ACSC	Not Included	Hawkeye4	BW O3_0.5	4-12	MYO-Norm	0.106328	0.0229666	0.0227163	0.152953	32.5027	2.27131	42.6084	0.873348
							MYO-Def	0.0541638	0.019122	0.00492076	0.121665
							BG	0.00285736	0.00249547	-2.14658e-05	0.0115722
	antlathla	ACSC	Not Included	Hawkeye4	BW O3_0.5	8-4	MYO-Norm	0.102341	0.0246721	0.0251073	0.151324	29.6711	1.89829	38.3175	0.697708
							MYO-Def	0.0555061	0.0176366	0.00953907	0.116143
							BG	0.00382806	0.00267087	0.0006205	0.0129741
	antlathla	ACSC	Not Included	Hawkeye4	BW O3_0.5	8-6	MYO-Norm	0.112845	0.0253188	0.0237084	0.164967	30.4118	2.07871	43.7664	0.873786
							MYO-Def	0.0602145	0.0192118	0.0060779	0.123794
							BG	0.00295078	0.00257835	-3.43886e-05	0.0120646
	antlathla	ACSC	Not Included	Hawkeye4	BW O3_0.5	16-2	MYO-Norm	0.142922	0.0311175	0.0472425	0.226482	35.3103	2.39715	39.9559	0.641116												done
							MYO-Def	0.0683288	0.0412885	0.00308371	0.194382
							BG	0.00557932	0.00357699	0.00105049	0.0155256
7	antlathla	ACSC	Included	Hawkeye4	BW O3_0.5	2-4	MYO-Norm	0.0743074	0.026037	0.0304175	0.126584	28.2036	1.25567	16.9359	0.40885
							MYO-Def	0.0416135	0.0129157	0.0228914	0.0939502
							BG	0.0107315	0.00438757	0.0030305	0.0194607
	antlathla	ACSC	Included	Hawkeye4	BW O3_0.5	2-6	MYO-Norm	0.0932385	0.0290653	0.0321762	0.148726	29.3875	1.4572	21.2786	0.476401
							MYO-Def	0.0508844	0.0159415	0.0229246	0.111937
							BG	0.00919772	0.0043818	0.00256275	0.0195675
	antlathla	ACSC	Included	Hawkeye4	BW O3_0.5	2-8	MYO-Norm	0.105146	0.0280738	0.0288434	0.153334	30.1542	1.73545	25.0021	0.522509
							MYO-Def	0.0564254	0.0174814	0.0212256	0.119024
							BG	0.00804863	0.00420548	0.00211557	0.0188709
	antlathla	ACSC	Included	Hawkeye4	BW O3_0.5	2-16	MYO-Norm	0.132909	0.0273225	0.0219303	0.188928	32.9818	2.41294	33.6409	0.693675
							MYO-Def	0.0669815	0.0213196	0.0141601	0.131902
							BG	0.00569548	0.00395081	0.000559632	0.0172257
	antlathla	ACSC	Included	Hawkeye4	BW O3_0.5	2-32	MYO-Norm	0.153072	0.0349042	0.0169551	0.228529	34.1903	2.23476	33.6905	0.956156
							MYO-Def	0.0750696	0.025065	0.00798668	0.176115
							BG	0.00475181	0.00454347	-0.000586965	0.018648
	antlathla	ACSC	Included	Hawkeye4	BW O3_0.5	4-4	MYO-Norm	0.108626	0.0297155	0.0295809	0.162	29.7744	1.67739	24.5823	0.527866
							MYO-Def	0.0587814	0.0185215	0.0220222	0.127573
							BG	0.0083712	0.00441887	0.00215185	0.0196717
	antlathla	ACSC	Included	Hawkeye4	BW O3_0.5	4-6	MYO-Norm	0.125685	0.0274792	0.0252365	0.175949	31.3766	2.18473	29.6867	0.617844
							MYO-Def	0.0656505	0.0204393	0.0178303	0.135008
							BG	0.00685239	0.00423371	0.00130703	0.0189216
	antlathla	ACSC	Included	Hawkeye4	BW O3_0.5	4-8	MYO-Norm	0.137118	0.0277904	0.0226104	0.193226	32.5353	2.42244	32.3578	0.707377
							MYO-Def	0.0697974	0.0219283	0.014508	0.138363
							BG	0.00599051	0.00423755	0.000513523	0.0187068
	antlathla	ACSC	Included	Hawkeye4	BW O3_0.5	4-12	MYO-Norm	0.15058	0.0314403	0.019499	0.218789	33.5367	2.40564	33.3963	0.860578
							MYO-Def	0.074946	0.0240539	0.0102805	0.163634
							BG	0.00523936	0.00450888	-0.000308849	0.0195146
	antlathla	ACSC	Included	Hawkeye4	BW O3_0.5	8-4	MYO-Norm	0.142572	0.0297245	0.0232958	0.200763	28.8047	2.14527	31.72	0.700546
							MYO-Def	0.078805	0.0216979	0.018365	0.153332
							BG	0.006416	0.0044947	0.000536794	0.0202626
	antlathla	ACSC	Included	Hawkeye4	BW O3_0.5	8-6	MYO-Norm	0.156227	0.0321017	0.0204683	0.225615	29.6501	2.22593	31.0187	0.898219
							MYO-Def	0.0847708	0.023323	0.0142157	0.166521
							BG	0.00560726	0.00503655	-0.000351787	0.0214452
	antlathla	ACSC	Included	Hawkeye4	BW O3_0.5	16-2	MYO-Norm	0.207674	0.0429257	0.0552002	0.331532	37.6545	2.6468	34.5684	0.634633
							MYO-Def	0.0940582	0.0517584	0.0116046	0.246509
							BG	0.0094663	0.00600763	0.000762654	0.0306503
6	antlathla	ACSC	Not Included	Hawkeye4	BW O3_0.5	2-4	MYO-Norm	0.0613399	0.0218481	0.0232977	0.110709	28.5067	1.2456	21.9259	0.388745
							MYO-Def	0.0341258	0.0115835	0.0175589	0.0872407
							BG	0.0071965	0.0027976	0.00171016	0.0130091
	antlathla	ACSC	Not Included	Hawkeye4	BW O3_0.5	2-6	MYO-Norm	0.0842972	0.0275129	0.030178	0.144433	30.4504	1.43039	31.9698	0.464433
							MYO-Def	0.044943	0.0152569	0.0186856	0.113339
							BG	0.00567742	0.00263678	0.0015483	0.0115562
	antlathla	ACSC	Not Included	Hawkeye4	BW O3_0.5	2-8	MYO-Norm	0.0969934	0.0267604	0.0315193	0.152391	30.7766	1.70596	41.1657	0.521187
							MYO-Def	0.0513411	0.0172125	0.0174818	0.121432
							BG	0.00452078	0.00235617	0.00124023	0.0102144
	antlathla	ACSC	Not Included	Hawkeye4	BW O3_0.5	2-16	MYO-Norm	0.12137	0.0257444	0.0264432	0.16412	31.9903	2.28525	69.3824	0.736732
							MYO-Def	0.0625375	0.0231177	0.0100623	0.149826
							BG	0.00237439	0.00174929	0.000431966	0.00741656
	antlathla	ACSC	Not Included	Hawkeye4	BW O3_0.5	2-32	MYO-Norm	0.137023	0.0320928	0.0237392	0.211952	32.5845	2.09862	99.8361	1.09139
							MYO-Def	0.0696724	0.0283891	0.00213964	0.188516
							BG	0.00125755	0.00137248	-0.000144051	0.0057943
	antlathla	ACSC	Not Included	Hawkeye4	BW O3_0.5	4-4	MYO-Norm	0.0993558	0.0281713	0.0326778	0.159203	30.901	1.66512	40.868	0.519377
							MYO-Def	0.0524472	0.0178231	0.0177284	0.128203
							BG	0.00468088	0.00243114	0.00128006	0.010489
	antlathla	ACSC	Not Included	Hawkeye4	BW O3_0.5	4-6	MYO-Norm	0.114944	0.0261768	0.0294584	0.164966	31.5308	2.10527	56.2183	0.626574
							MYO-Def	0.0598348	0.0209386	0.0141111	0.134469
							BG	0.00326314	0.0020446	0.000734632	0.00872346
	antlathla	ACSC	Not Included	Hawkeye4	BW O3_0.5	4-8	MYO-Norm	0.124127	0.0264797	0.0275051	0.167641	32.0603	2.27603	68.0861	0.736465
							MYO-Def	0.0638584	0.023341	0.0104508	0.149461
							BG	0.00247546	0.00182309	0.000444332	0.00774391
	antlathla	ACSC	Not Included	Hawkeye4	BW O3_0.5	4-12	MYO-Norm	0.134373	0.0293968	0.0254923	0.193008	32.5099	2.2429	85.3964	0.936235
							MYO-Def	0.068439	0.026456	0.00528279	0.173497
							BG	0.00168069	0.00157352	3.53354e-05	0.00662998
	antlathla	ACSC	Not Included	Hawkeye4	BW O3_0.5	8-4	MYO-Norm	0.132848	0.0295711	0.0287976	0.182245	30.3142	2.09012	71.5144	0.7007
							MYO-Def	0.0710408	0.0250468	0.0120962	0.158366
							BG	0.00265112	0.00185764	0.000504204	0.00826666
	antlathla	ACSC	Not Included	Hawkeye4	BW O3_0.5	8-6	MYO-Norm	0.143528	0.0316947	0.0270852	0.208193	30.6301	2.12366	89.6294	0.909403
							MYO-Def	0.0762192	0.0281248	0.0065747	0.184616
							BG	0.00176088	0.00160135	3.89811e-05	0.00703893
	antlathla	ACSC	Not Included	Hawkeye4	BW O3_0.5	16-2	MYO-Norm	0.177641	0.0404401	0.057556	0.2878	35.6411	2.30845	75.9841	0.616978												done
							MYO-Def	0.084287	0.0499747	0.00532707	0.25326
							BG	0.00378923	0.00233787	0.000644072	0.0104662
6	antlathla	ACSC	Included	Hawkeye4	BW O3_0.5	2-4	MYO-Norm	0.0983667	0.0328131	0.0365611	0.170079	30.0197	1.38429	21.8431	0.438303
							MYO-Def	0.0529438	0.0172053	0.0264946	0.13271
							BG	0.0102745	0.00450334	0.00266681	0.0190284
	antlathla	ACSC	Included	Hawkeye4	BW O3_0.5	2-6	MYO-Norm	0.122499	0.0347307	0.0398923	0.195833	30.9744	1.66826	30.1812	0.496578
							MYO-Def	0.064559	0.0205148	0.0259494	0.154618
							BG	0.0081735	0.00405878	0.00233882	0.0176344
	antlathla	ACSC	Included	Hawkeye4	BW O3_0.5	2-8	MYO-Norm	0.136722	0.0327831	0.0370117	0.200309	31.539	1.99992	37.8075	0.537206
							MYO-Def	0.0711585	0.0224519	0.0234739	0.161634
							BG	0.00673162	0.00361627	0.00189608	0.0158886
	antlathla	ACSC	Included	Hawkeye4	BW O3_0.5	2-16	MYO-Norm	0.166006	0.033328	0.0310747	0.228284	33.3927	2.49381	57.1209	0.727982
							MYO-Def	0.0828922	0.0283211	0.0130755	0.188949
							BG	0.00399216	0.00290622	0.000356808	0.0125997
	antlathla	ACSC	Included	Hawkeye4	BW O3_0.5	2-32	MYO-Norm	0.185423	0.0421786	0.0291316	0.270567	34.0661	2.23411	63.0755	1.04909
							MYO-Def	0.0911914	0.0342082	0.00378738	0.230689
							BG	0.00280215	0.0029397	-0.000531064	0.0116625
	antlathla	ACSC	Included	Hawkeye4	BW O3_0.5	4-4	MYO-Norm	0.142067	0.0352477	0.0387191	0.214665	31.0257	1.90879	36.986	0.544562
							MYO-Def	0.0747866	0.0235182	0.0248795	0.174853
							BG	0.00705356	0.0038411	0.00192547	0.0168167
	antlathla	ACSC	Included	Hawkeye4	BW O3_0.5	4-6	MYO-Norm	0.161024	0.0330041	0.0347864	0.215212	32.1584	2.37439	48.2453	0.639942
							MYO-Def	0.0826593	0.026489	0.019447	0.180586
							BG	0.00521549	0.00333761	0.00109059	0.0147564
	antlathla	ACSC	Included	Hawkeye4	BW O3_0.5	4-8	MYO-Norm	0.17266	0.0342094	0.0325422	0.234136	32.8751	2.49747	55.1122	0.744941
							MYO-Def	0.0872232	0.0289195	0.0141533	0.190188
							BG	0.00420554	0.00313288	0.000346673	0.0137117
	antlathla	ACSC	Included	Hawkeye4	BW O3_0.5	4-12	MYO-Norm	0.185776	0.0387443	0.0304711	0.258953	33.4174	2.40199	60.7161	0.933349
							MYO-Def	0.0927125	0.0323949	0.00765292	0.217042
							BG	0.00327825	0.00305975	-0.000336786	0.0130299
	antlathla	ACSC	Included	Hawkeye4	BW O3_0.5	8-4	MYO-Norm	0.180727	0.036286	0.0339223	0.238958	30.3136	2.31719	56.2581	0.705745
							MYO-Def	0.0966454	0.030435	0.0168152	0.200889
							BG	0.00455187	0.00321246	0.000369339	0.0140188
	antlathla	ACSC	Included	Hawkeye4	BW O3_0.5	8-6	MYO-Norm	0.194029	0.039678	0.0325178	0.265981	30.7451	2.29984	58.7098	0.941838
							MYO-Def	0.102776	0.0337828	0.0102081	0.227806
							BG	0.00350897	0.00330488	-0.000348106	0.0133729
	antlathla	ACSC	Included	Hawkeye4	BW O3_0.5	16-2	MYO-Norm	0.248261	0.0551398	0.0630709	0.39377	38.8321	2.51869	69.7758	0.585703
							MYO-Def	0.109381	0.0610799	0.00883581	0.309514
							BG	0.00607472	0.00355798	0.00080768	0.0166422
5	antlathla	ACSC	Not Included	Hawkeye4	BW O3_0.5	2-4	MYO-Norm	0.0696425	0.0253925	0.0234075	0.130809	28.638	1.22116	24.5808	0.396378
							MYO-Def	0.0386342	0.0132541	0.0192153	0.104151
							BG	0.00714774	0.00283321	0.00175009	0.0130561
	antlathla	ACSC	Not Included	Hawkeye4	BW O3_0.5	2-6	MYO-Norm	0.094946	0.0312585	0.0277	0.166522	30.4794	1.41907	37.0444	0.471027
							MYO-Def	0.0505881	0.0170979	0.0199336	0.130682
							BG	0.00544136	0.00256303	0.00153006	0.0115378
	antlathla	ACSC	Not Included	Hawkeye4	BW O3_0.5	2-8	MYO-Norm	0.108472	0.0304463	0.0287734	0.174804	30.8842	1.68137	55.535	0.465137
							MYO-Def	0.0572806	0.0189988	0.0179694	0.135954
							BG	0.00419924	0.00195322	0.00123004	0.0100087
	antlathla	ACSC	Not Included	Hawkeye4	BW O3_0.5	2-16	MYO-Norm	0.133146	0.0303463	0.0223002	0.178739	32.1851	2.13661	69.4645	145.892
							MYO-Def	0.0683078	0.0245627	0.00969116	0.16025
							BG	0.00243815	0.00191675	0.000208005	0.00958745
	antlathla	ACSC	Not Included	Hawkeye4	BW O3_0.5	2-32	MYO-Norm	0.148309	0.0373198	0.0183448	0.223172	32.7481	1.96072	108.039	-35.7767
							MYO-Def	0.0751352	0.0299439	0.00164001	0.197208
							BG	0.00114396	0.00137273	-0.00104313	0.00804291
	antlathla	ACSC	Not Included	Hawkeye4	BW O3_0.5	4-4	MYO-Norm	0.111037	0.0318603	0.0295489	0.182072	30.8519	1.64342	48.6117	0.525353
							MYO-Def	0.058677	0.0196235	0.0183356	0.141014
							BG	0.00434786	0.00228416	0.0012642	0.0106181
	antlathla	ACSC	Not Included	Hawkeye4	BW O3_0.5	4-6	MYO-Norm	0.127029	0.0303971	0.0255369	0.185882	31.5726	2.00561	68.3944	0.642493
							MYO-Def	0.0660644	0.0225747	0.0135295	0.142693
							BG	0.00289077	0.0018573	0.000616125	0.00870192
	antlathla	ACSC	Not Included	Hawkeye4	BW O3_0.5	4-8	MYO-Norm	0.13613	0.0311789	0.0230307	0.186557	32.0896	2.12138	84.2097	0.766724
							MYO-Def	0.0699877	0.0248619	0.00989082	0.159617
							BG	0.0021084	0.00161656	0.000202893	0.00763205
	antlathla	ACSC	Not Included	Hawkeye4	BW O3_0.5	4-12	MYO-Norm	0.146089	0.0345494	0.0203008	0.205571	32.4933	2.07399	88.988	1.0174
							MYO-Def	0.0744338	0.028008	0.00495945	0.181794
							BG	0.00161359	0.00164167	-0.000224814	0.00864937
	antlathla	ACSC	Not Included	Hawkeye4	BW O3_0.5	8-4	MYO-Norm	0.146019	0.034777	0.0244058	0.207512	30.7316	1.97402	88.9953	0.715407
							MYO-Def	0.0773685	0.0271665	0.0111941	0.171785
							BG	0.00229345	0.00164075	0.000231077	0.00826828
	antlathla	ACSC	Not Included	Hawkeye4	BW O3_0.5	8-6	MYO-Norm	0.15638	0.0375324	0.0217885	0.224241	30.9772	1.97084	115.71	0.951251												done
							MYO-Def	0.0824096	0.0304526	0.00616135	0.196337
							BG	0.00142074	0.00135148	-0.000185522	0.00690984
	antlathla	ACSC	Not Included	Hawkeye4	BW O3_0.5	16-2	MYO-Norm	0.189526	0.0465749	0.0433774	0.291203	35.6178	2.13746	95.7308	0.615192
							MYO-Def	0.0899742	0.0504511	0.00426799	0.256644
							BG	0.00321815	0.00197978	0.000313656	0.0105465
5	antlathla	ACSC	Included	Hawkeye4	BW O3_0.5	2-4	MYO-Norm	0.10967	0.0371184	0.0361893	0.196839	30.1122	1.36758	23.0313	0.352146
							MYO-Def	0.0589076	0.019357	0.0296721	0.154579
							BG	0.0135222	0.00476179	0.00350982	0.0233933
	antlathla	ACSC	Included	Hawkeye4	BW O3_0.5	2-6	MYO-Norm	0.135695	0.0388873	0.0379949	0.22425	31.0703	1.65435	29.503	0.43527
							MYO-Def	0.0713618	0.022801	0.0279111	0.175817
							BG	0.0105667	0.00459937	0.00265829	0.0230431
	antlathla	ACSC	Included	Hawkeye4	BW O3_0.5	2-8	MYO-Norm	0.15052	0.0370455	0.0345252	0.230464	31.6783	1.95496	35.5438	0.500677
							MYO-Def	0.0780977	0.0248805	0.0239958	0.179839
							BG	0.0084581	0.00423478	0.00194382	0.0212131
	antlathla	ACSC	Included	Hawkeye4	BW O3_0.5	2-16	MYO-Norm	0.179576	0.0384608	0.027171	0.243531	33.4742	2.34192	58.0998	205.394
							MYO-Def	0.0895038	0.0311569	0.0123949	0.20496
							BG	0.00392684	0.00309082	0.000187254	0.0156251
	antlathla	ACSC	Included	Hawkeye4	BW O3_0.5	2-32	MYO-Norm	0.198027	0.0474435	0.0236879	0.291085	34.1362	2.12445	73.0175	-83.8118
							MYO-Def	0.0972355	0.0374559	0.00397074	0.251943
							BG	0.00237328	0.00271205	-0.000566072	0.0155966
	antlathla	ACSC	Included	Hawkeye4	BW O3_0.5	4-4	MYO-Norm	0.156771	0.0395134	0.0359402	0.243347	31.0468	1.87993	35.2825	0.49991
							MYO-Def	0.0824886	0.0263427	0.0251922	0.193998
							BG	0.00888822	0.00444331	0.00203617	0.0223025
	antlathla	ACSC	Included	Hawkeye4	BW O3_0.5	4-6	MYO-Norm	0.176032	0.0381049	0.0311385	0.248912	32.2061	2.25075	44.8293	0.630997
							MYO-Def	0.0902673	0.0295487	0.0185705	0.195423
							BG	0.00622304	0.00392672	0.000893595	0.0197089
	antlathla	ACSC	Included	Hawkeye4	BW O3_0.5	4-8	MYO-Norm	0.187444	0.0397638	0.0282555	0.252654	32.8749	2.33257	51.2941	0.763254
							MYO-Def	0.094692	0.0321465	0.0133825	0.207265
							BG	0.00478779	0.0036543	0.000207216	0.0190248
	antlathla	ACSC	Included	Hawkeye4	BW O3_0.5	4-12	MYO-Norm	0.200026	0.0445022	0.0252045	0.282955	33.3692	2.24918	65.9114	1.00153
							MYO-Def	0.0999324	0.0358687	0.00725949	0.238369
							BG	0.00303012	0.00303477	-0.000367917	0.015882
	antlathla	ACSC	Included	Hawkeye4	BW O3_0.5	8-4	MYO-Norm	0.196584	0.0427694	0.0289003	0.268289	30.8972	2.16987	53.5091	0.731003
							MYO-Def	0.10378	0.0345809	0.0144256	0.219871
							BG	0.00502575	0.00367384	0.000215522	0.0184676
	antlathla	ACSC	Included	Hawkeye4	BW O3_0.5	8-6	MYO-Norm	0.209155	0.0466375	0.0262108	0.292432	31.1962	2.13277	60.9717	0.985798
							MYO-Def	0.109688	0.0383737	0.00874909	0.252049
							BG	0.00347978	0.00343036	-0.00045817	0.0172611
	antlathla	ACSC	Included	Hawkeye4	BW O3_0.5	16-2	MYO-Norm	0.261629	0.0604881	0.0529834	0.408386	38.9257	2.42382	76.827	0.535323
							MYO-Def	0.115017	0.0623704	0.00930985	0.302567
							BG	0.00636145	0.00340543	0.00105442	0.0164448
4	antlathla	ACSC	Not Included	Hawkeye4	BW O3_0.5	2-4	MYO-Norm	0.0665185	0.0231202	0.0232743	0.120673	27.8781	1.25444	19.9356	0.405488
							MYO-Def	0.0375157	0.0121936	0.0198252	0.101642
							BG	0.00822877	0.00333667	0.00209312	0.0157865
	antlathla	ACSC	Not Included	Hawkeye4	BW O3_0.5	2-6	MYO-Norm	0.0913956	0.02871	0.0278122	0.155235	30.1809	1.47607	28.994	0.487232
							MYO-Def	0.0490176	0.0158011	0.0209578	0.129215
							BG	0.00646967	0.00315223	0.00163096	0.01509
	antlathla	ACSC	Not Included	Hawkeye4	BW O3_0.5	2-8	MYO-Norm	0.104982	0.0280773	0.0316996	0.163135	30.8966	1.76511	37.4484	0.551745
							MYO-Def	0.0554225	0.017869	0.0192459	0.135827
							BG	0.00508093	0.00280338	0.00124601	0.0139782
	antlathla	ACSC	Not Included	Hawkeye4	BW O3_0.5	2-16	MYO-Norm	0.13009	0.0288848	0.0285036	0.182136	32.6956	2.21941	65.3223	0.800035
							MYO-Def	0.0659828	0.0242008	0.0102656	0.165292
							BG	0.00248928	0.00199151	0.000344484	0.010909
	antlathla	ACSC	Not Included	Hawkeye4	BW O3_0.5	2-32	MYO-Norm	0.145743	0.0366351	0.0252127	0.231313	33.5106	1.99704	102.935	1.21338
							MYO-Def	0.0725812	0.0298985	0.00239371	0.206412
							BG	0.00116688	0.00141587	-0.000368217	0.00922548
	antlathla	ACSC	Not Included	Hawkeye4	BW O3_0.5	4-4	MYO-Norm	0.107546	0.0293525	0.0314403	0.16913	30.9096	1.73022	37.288	0.550194
							MYO-Def	0.0567598	0.0184224	0.0195297	0.141402
							BG	0.00524215	0.0028842	0.00129356	0.0143091
	antlathla	ACSC	Not Included	Hawkeye4	BW O3_0.5	4-6	MYO-Norm	0.123784	0.0283023	0.0319713	0.175411	31.9612	2.11861	52.0328	0.67394
							MYO-Def	0.0638226	0.0218096	0.0146599	0.145364
							BG	0.00352993	0.00237896	0.00074634	0.0123417
	antlathla	ACSC	Not Included	Hawkeye4	BW O3_0.5	4-8	MYO-Norm	0.1331	0.0294767	0.0298228	0.182345	32.6461	2.22262	64.2049	0.801541
							MYO-Def	0.0675844	0.0243928	0.0105787	0.165178
							BG	0.00258633	0.00207305	0.00035656	0.0113602
	antlathla	ACSC	Not Included	Hawkeye4	BW O3_0.5	4-12	MYO-Norm	0.14337	0.0333549	0.027521	0.212282	33.2215	2.14375	84.0219	1.03557
							MYO-Def	0.0718655	0.0278008	0.00543149	0.190555
							BG	0.00164773	0.00170634	-0.000194583	0.0102508
	antlathla	ACSC	Not Included	Hawkeye4	BW O3_0.5	8-4	MYO-Norm	0.143108	0.0326472	0.0319508	0.199232	31.3038	2.0901	66.7366	0.777475
							MYO-Def	0.074872	0.0264684	0.0120804	0.176268
							BG	0.00275812	0.00214437	0.000372265	0.0126278																done
	antlathla	ACSC	Not Included	Hawkeye4	BW O3_0.5	8-6	MYO-Norm	0.153822	0.0358467	0.0299213	0.229854	31.7092	2.06618	88.4334	1.02665
							MYO-Def	0.0797562	0.0300972	0.00675997	0.204307
							BG	0.00169426	0.00173941	-0.000249913	0.0111495
	antlathla	ACSC	Not Included	Hawkeye4	BW O3_0.5	16-2	MYO-Norm	0.18767	0.0447408	0.0634854	0.29433	35.5195	2.1988	74.1128	0.68582
							MYO-Def	0.0892938	0.0501539	0.00511544	0.262796
							BG	0.00369225	0.00253222	0.000385848	0.0166324
4	antlathla	ACSC	Included	Hawkeye4	BW O3_0.5	2-4	MYO-Norm	0.105682	0.0342535	0.0363222	0.182537	29.3657	1.40071	20.5576	0.450309
							MYO-Def	0.0577029	0.0185358	0.0283028	0.150881
							BG	0.0114161	0.00514077	0.00303643	0.0230193
	antlathla	ACSC	Included	Hawkeye4	BW O3_0.5	2-6	MYO-Norm	0.13171	0.0361146	0.041701	0.208698	30.7272	1.71444	28.4122	0.519387
							MYO-Def	0.0697936	0.0217652	0.0267665	0.172411
							BG	0.00892529	0.00463568	0.00241631	0.0226792
	antlathla	ACSC	Included	Hawkeye4	BW O3_0.5	2-8	MYO-Norm	0.146792	0.0346115	0.0414224	0.217551	31.5806	2.03582	35.97	0.568471
							MYO-Def	0.0763291	0.0237896	0.0222095	0.176622
							BG	0.00717883	0.00408096	0.00191253	0.0208188
	antlathla	ACSC	Included	Hawkeye4	BW O3_0.5	2-16	MYO-Norm	0.176765	0.0374043	0.0346489	0.236297	33.7941	2.38731	59.2716	0.777154
							MYO-Def	0.0874693	0.0302621	0.0130787	0.209464
							BG	0.00383745	0.00298229	0.000127418	0.0149624
	antlathla	ACSC	Included	Hawkeye4	BW O3_0.5	2-32	MYO-Norm	0.196022	0.0474017	0.0314876	0.298896	34.643	2.128	76.5693	1.15205
							MYO-Def	0.095151	0.0366996	0.00528927	0.254977
							BG	0.00222217	0.00256006	-0.0008044	0.0132196
	antlathla	ACSC	Included	Hawkeye4	BW O3_0.5	4-4	MYO-Norm	0.152759	0.0368304	0.043657	0.228935	30.8963	1.95799	35.3688	0.571289
							MYO-Def	0.0806456	0.0250464	0.0230225	0.191726
							BG	0.00756015	0.00431903	0.00198718	0.0222648
	antlathla	ACSC	Included	Hawkeye4	BW O3_0.5	4-6	MYO-Norm	0.172494	0.0360348	0.0391905	0.236209	32.315	2.33818	48.0213	0.675453
							MYO-Def	0.0882383	0.0283839	0.0171148	0.192783
							BG	0.00531796	0.00359203	0.000937064	0.0182306
	antlathla	ACSC	Included	Hawkeye4	BW O3_0.5	4-8	MYO-Norm	0.184304	0.0382503	0.0365169	0.24469	33.1286	2.39807	57.2807	0.789032
							MYO-Def	0.0925772	0.0311297	0.0134966	0.212218
							BG	0.00407786	0.00321756	0.000131406	0.0155636
	antlathla	ACSC	Included	Hawkeye4	BW O3_0.5	4-12	MYO-Norm	0.197405	0.0436549	0.0336211	0.288319	33.7605	2.28263	68.2026	1.00162
							MYO-Def	0.0977569	0.0350045	0.0090398	0.241477
							BG	0.0028897	0.00289439	-0.000584813	0.0144202
	antlathla	ACSC	Included	Hawkeye4	BW O3_0.5	8-4	MYO-Norm	0.193896	0.0405369	0.0382593	0.26766	31.0298	2.26547	59.462	0.752905
							MYO-Def	0.102061	0.0335193	0.013194	0.227159
							BG	0.00433101	0.00326084	0.000248469	0.0166102
	antlathla	ACSC	Included	Hawkeye4	BW O3_0.5	8-6	MYO-Norm	0.207049	0.0448348	0.0358777	0.294159	31.4722	2.21096	68.6607	1.01497
							MYO-Def	0.107921	0.0375196	0.0088256	0.258163
							BG	0.00297105	0.00301554	-0.000559209	0.0156482
	antlathla	ACSC	Included	Hawkeye4	BW O3_0.5	16-2	MYO-Norm	0.261038	0.0588105	0.0675632	0.397892	38.3544	2.46094	81.9601	0.586052
							MYO-Def	0.116309	0.0632591	0.0113284	0.332341
							BG	0.00543457	0.00318494	0.000661568	0.0159581
3	antlathla	ACSC	Not Included	Hawkeye4	BW O3_0.5	2-4	MYO-Norm	0.0583442	0.019685	0.0242595	0.102782	27.26	1.26977	22.5056	0.348334
							MYO-Def	0.0333487	0.010835	0.0187585	0.0815753
							BG	0.00744237	0.00259243	0.00193722	0.0139196
	antlathla	ACSC	Not Included	Hawkeye4	BW O3_0.5	2-6	MYO-Norm	0.0807095	0.0249925	0.0229429	0.133681	29.6437	1.47682	32.1577	0.432162
							MYO-Def	0.0438002	0.0140086	0.0206324	0.103843
							BG	0.00580754	0.0025098	0.00157852	0.0119712
	antlathla	ACSC	Not Included	Hawkeye4	BW O3_0.5	2-8	MYO-Norm	0.0934059	0.0245463	0.0200213	0.140921	30.3505	1.77203	41.1177	0.498007
							MYO-Def	0.0499091	0.0155461	0.0199026	0.110417
							BG	0.00456152	0.00227167	0.0013018	0.0105774
	antlathla	ACSC	Not Included	Hawkeye4	BW O3_0.5	2-16	MYO-Norm	0.118158	0.0251062	0.0134324	0.161413	32.2105	2.29321	68.4688	0.751067
							MYO-Def	0.0605842	0.0204744	0.0142666	0.147999
							BG	0.00229769	0.00172572	0.000305962	0.00751837
	antlathla	ACSC	Not Included	Hawkeye4	BW O3_0.5	2-32	MYO-Norm	0.134174	0.0326815	0.00861445	0.206782	33.0552	2.03988	99.6265	1.15774
							MYO-Def	0.0675077	0.0254599	0.00746861	0.186395
							BG	0.00116327	0.00134677	-0.000199518	0.00614459
	antlathla	ACSC	Not Included	Hawkeye4	BW O3_0.5	4-4	MYO-Norm	0.0957434	0.0257896	0.0204176	0.146566	30.409	1.73136	41.1325	0.494577
							MYO-Def	0.0510922	0.0162383	0.0204417	0.115881
							BG	0.00470641	0.00232768	0.00130591	0.0108797
	antlathla	ACSC	Not Included	Hawkeye4	BW O3_0.5	4-6	MYO-Norm	0.111542	0.0245728	0.0162711	0.1549	31.4588	2.17253	56.3053	0.619106
							MYO-Def	0.0581568	0.0187533	0.0173195	0.128024
							BG	0.00319981	0.00198102	0.000778012	0.00893047																done
	antlathla	ACSC	Not Included	Hawkeye4	BW O3_0.5	4-8	MYO-Norm	0.12091	0.0255749	0.0137384	0.163694	32.184	2.30218	68.0095	0.747387
							MYO-Def	0.062032	0.0208331	0.0145658	0.14792
							BG	0.00237874	0.00177784	0.000338643	0.00773539
	antlathla	ACSC	Not Included	Hawkeye4	BW O3_0.5	4-12	MYO-Norm	0.131393	0.0293313	0.0106984	0.189571	32.8016	2.21291	85.6287	0.979891
							MYO-Def	0.0664856	0.0237333	0.01098	0.171969
							BG	0.00156594	0.00153445	-7.63544e-05	0.00681647
	antlathla	ACSC	Not Included	Hawkeye4	BW O3_0.5	8-4	MYO-Norm	0.129599	0.0282309	0.0141067	0.179903	30.2583	2.13278	73.6852	0.696554
							MYO-Def	0.0693887	0.0225513	0.0163326	0.158143
							BG	0.00252503	0.00175882	0.000396201	0.00821001
	antlathla	ACSC	Not Included	Hawkeye4	BW O3_0.5	8-6	MYO-Norm	0.140531	0.0310553	0.0109684	0.205632	30.7354	2.12771	92.8989	0.936745
							MYO-Def	0.0744544	0.0255034	0.0125671	0.184485
							BG	0.00161488	0.00151273	-6.53448e-05	0.00718315
	antlathla	ACSC	Not Included	Hawkeye4	BW O3_0.5	16-2	MYO-Norm	0.174867	0.0397909	0.0291749	0.281757	34.553	2.25708	82.528	0.58831
							MYO-Def	0.0850558	0.0484994	0.00763114	0.246534
							BG	0.00360164	0.00211888	0.000707815	0.0116701
3	antlathla	ACSC	Included	Hawkeye4	BW O3_0.5	2-4	MYO-Norm	0.0946435	0.0301255	0.0292088	0.156247	29.1188	1.417	22.5805	0.394873
							MYO-Def	0.0519556	0.0163574	0.0276061	0.124377
							BG	0.0106145	0.00419138	0.00296285	0.0192022
	antlathla	ACSC	Included	Hawkeye4	BW O3_0.5	2-6	MYO-Norm	0.118635	0.0321942	0.0248896	0.179793	30.4903	1.72206	30.8572	0.460267
							MYO-Def	0.0631946	0.0192662	0.0275681	0.14384
							BG	0.00835309	0.00384465	0.00244162	0.0171843
	antlathla	ACSC	Included	Hawkeye4	BW O3_0.5	2-8	MYO-Norm	0.133031	0.0309934	0.0209304	0.187153	31.3404	2.04842	38.3824	0.50895
							MYO-Def	0.0695434	0.0208902	0.0254113	0.149102
							BG	0.00680998	0.00346594	0.00201959	0.0156537
	antlathla	ACSC	Included	Hawkeye4	BW O3_0.5	2-16	MYO-Norm	0.163031	0.0343629	0.0127232	0.228526	33.6995	2.39168	56.5683	0.734769
							MYO-Def	0.0808458	0.0261185	0.0172934	0.185654
							BG	0.00392235	0.00288202	0.000322248	0.0126302
	antlathla	ACSC	Included	Hawkeye4	BW O3_0.5	2-32	MYO-Norm	0.183053	0.0446956	0.00637799	0.273003	34.5939	2.10531	63.3147	1.07672
							MYO-Def	0.0889548	0.0316999	0.00929192	0.229979
							BG	0.00268516	0.00289116	-0.000564784	0.0117875
	antlathla	ACSC	Included	Hawkeye4	BW O3_0.5	4-4	MYO-Norm	0.138007	0.0328695	0.0216585	0.196426	30.6438	1.96966	37.4302	0.516811
							MYO-Def	0.0732651	0.0221903	0.026904	0.161188
							BG	0.00713423	0.00368705	0.00205748	0.0165511
	antlathla	ACSC	Included	Hawkeye4	BW O3_0.5	4-6	MYO-Norm	0.157321	0.0323199	0.0164625	0.212564	32.099	2.36559	48.1478	0.630055
							MYO-Def	0.0808655	0.0247873	0.0218258	0.163835
							BG	0.00518599	0.00326746	0.00098061	0.0143923
	antlathla	ACSC	Included	Hawkeye4	BW O3_0.5	4-8	MYO-Norm	0.169258	0.0347681	0.0132214	0.233346	32.9942	2.41548	54.5529	0.751973
							MYO-Def	0.0852765	0.0269857	0.0179015	0.187004
							BG	0.004126	0.00310264	0.000327054	0.0132594
	antlathla	ACSC	Included	Hawkeye4	BW O3_0.5	4-12	MYO-Norm	0.18276	0.0404669	0.00921153	0.258593	33.7044	2.27694	60.2359	0.960091
							MYO-Def	0.0906191	0.0302061	0.0128106	0.215491
							BG	0.00316019	0.00303407	-0.000312994	0.0122706
	antlathla	ACSC	Included	Hawkeye4	BW O3_0.5	8-4	MYO-Norm	0.177309	0.035599	0.0130249	0.241618	30.0464	2.30153	56.3342	0.710163
							MYO-Def	0.0953768	0.0289095	0.018139	0.198446
							BG	0.00443201	0.00314745	0.000314819	0.0141368
	antlathla	ACSC	Included	Hawkeye4	BW O3_0.5	8-6	MYO-Norm	0.191019	0.0401081	0.00909374	0.265339	30.6631	2.23531	59.3413	0.963637
							MYO-Def	0.101365	0.0320631	0.0131404	0.228203
							BG	0.00334046	0.00321899	-0.000274061	0.0136576
	antlathla	ACSC	Included	Hawkeye4	BW O3_0.5	16-2	MYO-Norm	0.245914	0.0553235	0.028172	0.391494	37.4489	2.42215	72.448	0.55828
							MYO-Def	0.111912	0.0614755	0.0140735	0.308878
							BG	0.00608001	0.00339435	0.000539776	0.0159361
2	antlathla	ACSC	Not Included	Hawkeye4	BW O3_0.5	2-4	MYO-Norm	0.0479675	0.0161333	0.0201561	0.0816753	26.2527	1.23648	19.2533	0.31699
							MYO-Def	0.028019	0.00854251	0.0162664	0.0664808
							BG	0.00785953	0.00249139	0.00212578	0.013676
	antlathla	ACSC	Not Included	Hawkeye4	BW O3_0.5	2-6	MYO-Norm	0.0664528	0.0208954	0.0246098	0.106916	28.7961	1.42208	24.7543	0.411859
							MYO-Def	0.0367379	0.0111256	0.0191172	0.0864784
							BG	0.00651801	0.0026845	0.00173279	0.013062
	antlathla	ACSC	Not Included	Hawkeye4	BW O3_0.5	2-8	MYO-Norm	0.0774811	0.0207602	0.0252839	0.114361	29.5724	1.7036	29.494	0.488187
							MYO-Def	0.042114	0.0125101	0.0200301	0.0932679
							BG	0.00538115	0.00262701	0.00128759	0.0124779
	antlathla	ACSC	Not Included	Hawkeye4	BW O3_0.5	2-16	MYO-Norm	0.101076	0.0203998	0.0189987	0.147051	31.964	2.40026	44.0215	0.72892
							MYO-Def	0.0521112	0.0171439	0.0134779	0.111479
							BG	0.00314995	0.00229606	0.00039023	0.0103882
	antlathla	ACSC	Not Included	Hawkeye4	BW O3_0.5	2-32	MYO-Norm	0.117527	0.0269351	0.0139476	0.174389	33.4542	2.1876	58.3018	1.03975
							MYO-Def	0.0586038	0.0216706	0.00580097	0.143385
							BG	0.00193877	0.00201584	-0.000480831	0.00867499
	antlathla	ACSC	Not Included	Hawkeye4	BW O3_0.5	4-4	MYO-Norm	0.0795615	0.0219623	0.0259493	0.121038	29.8424	1.66522	29.5265	0.487747
							MYO-Def	0.0429894	0.0130662	0.0204085	0.0973437
							BG	0.00552454	0.00269458	0.00130906	0.0128755
	antlathla	ACSC	Not Included	Hawkeye4	BW O3_0.5	4-6	MYO-Norm	0.0942301	0.0205596	0.0220229	0.135247	31.1037	2.17471	37.5262	0.615615
							MYO-Def	0.0495189	0.0154376	0.0173684	0.103329
							BG	0.00407893	0.00251105	0.00074995	0.0116638
	antlathla	ACSC	Not Included	Hawkeye4	BW O3_0.5	4-8	MYO-Norm	0.103515	0.020897	0.0195611	0.149896	32.1172	2.40839	43.5999	0.730184
							MYO-Def	0.0531868	0.0174177	0.0140069	0.11113
							BG	0.00325151	0.0023742	0.0003893	0.0107244
	antlathla	ACSC	Not Included	Hawkeye4	BW O3_0.5	4-12	MYO-Norm	0.114231	0.0238784	0.0164402	0.167244	33.1525	2.38219	51.9494	0.915594
							MYO-Def	0.0573482	0.0200927	0.00919842	0.130608
							BG	0.0024016	0.00219889	-3.69179e-05	0.00958217
	antlathla	ACSC	Not Included	Hawkeye4	BW O3_0.5	8-4	MYO-Norm	0.110835	0.023564	0.0200827	0.158623	29.9675	2.16907	45.6993	0.712235
							MYO-Def	0.059723	0.0184661	0.0158217	0.12101
							BG	0.00340521	0.00242531	0.00043532	0.0113458																done
	antlathla	ACSC	Not Included	Hawkeye4	BW O3_0.5	8-6	MYO-Norm	0.121985	0.0253336	0.0168892	0.176936	30.8624	2.27119	54.9717	0.906734
							MYO-Def	0.0644475	0.020955	0.0109871	0.1349
							BG	0.0024473	0.00221905	-5.03364e-05	0.0100265
	antlathla	ACSC	Not Included	Hawkeye4	BW O3_0.5	16-2	MYO-Norm	0.154875	0.0346936	0.041099	0.244175	34.8963	2.30962	49.8458	0.629356
							MYO-Def	0.0747459	0.044213	0.00653512	0.209851
							BG	0.00493692	0.00310708	0.000876392	0.0154432
2	antlathla	ACSC	Included	Hawkeye4	BW O3_0.5	2-4	MYO-Norm	0.0786705	0.0248921	0.0323404	0.126907	27.8001	1.37498	19.062	0.363902
							MYO-Def	0.0444444	0.0128241	0.0271459	0.100358
							BG	0.0113412	0.00412709	0.00314258	0.0193683
	antlathla	ACSC	Included	Hawkeye4	BW O3_0.5	2-6	MYO-Norm	0.0993558	0.0275837	0.0306477	0.145866	29.3044	1.63264	23.9288	0.442328
							MYO-Def	0.0543216	0.0156087	0.0293966	0.117817
							BG	0.00938704	0.00415215	0.00228754	0.0184488
	antlathla	ACSC	Included	Hawkeye4	BW O3_0.5	2-8	MYO-Norm	0.112457	0.0269142	0.0268746	0.158411	30.2672	1.94166	28.1809	0.50105
							MYO-Def	0.0601989	0.0172636	0.0260464	0.12342
							BG	0.00796436	0.00399054	0.00172025	0.017408
	antlathla	ACSC	Included	Hawkeye4	BW O3_0.5	2-16	MYO-Norm	0.142136	0.0292026	0.0182367	0.215578	33.3031	2.43196	37.6047	0.731036
							MYO-Def	0.0711163	0.0223881	0.0177445	0.139268
							BG	0.00517039	0.00377974	0.000412713	0.0152679
	antlathla	ACSC	Included	Hawkeye4	BW O3_0.5	2-32	MYO-Norm	0.163102	0.0385943	0.0107257	0.257625	34.721	2.17833	38.3703	1.04992
							MYO-Def	0.079031	0.0276687	0.00851106	0.179585
							BG	0.00404864	0.00425074	-0.000440676	0.0174939
	antlathla	ACSC	Included	Hawkeye4	BW O3_0.5	4-4	MYO-Norm	0.116228	0.0283469	0.0278586	0.162338	29.6872	1.87719	27.6535	0.506886
							MYO-Def	0.0630156	0.0183545	0.0267247	0.132093
							BG	0.00829183	0.00420301	0.00171959	0.0181522
	antlathla	ACSC	Included	Hawkeye4	BW O3_0.5	4-6	MYO-Norm	0.134686	0.0275955	0.0226663	0.197962	31.4266	2.33415	33.4248	0.624312
							MYO-Def	0.0702741	0.0209486	0.0216844	0.136247
							BG	0.00645434	0.00402952	0.00103651	0.0164119
	antlathla	ACSC	Included	Hawkeye4	BW O3_0.5	4-8	MYO-Norm	0.14674	0.029407	0.0192307	0.221514	32.6393	2.45582	36.4341	0.740876
							MYO-Def	0.0745217	0.0230981	0.0185665	0.143071
							BG	0.0054362	0.00402755	0.000357197	0.0163592
	antlathla	ACSC	Included	Hawkeye4	BW O3_0.5	4-12	MYO-Norm	0.160731	0.0344944	0.0147392	0.248773	33.7363	2.35087	37.9431	0.932033
							MYO-Def	0.0796391	0.0261724	0.0128629	0.169905
							BG	0.00454502	0.00423611	-0.00023996	0.0175052
	antlathla	ACSC	Included	Hawkeye4	BW O3_0.5	8-4	MYO-Norm	0.153457	0.0295812	0.0199468	0.220616	29.0969	2.33847	36.8885	0.727827
							MYO-Def	0.0842822	0.0239475	0.0197282	0.153665
							BG	0.00571567	0.00416002	0.000355815	0.0168723
	antlathla	ACSC	Included	Hawkeye4	BW O3_0.5	8-6	MYO-Norm	0.16776	0.0331466	0.015696	0.247665	30.1055	2.34223	36.7863	0.963913
							MYO-Def	0.090123	0.0268734	0.0156132	0.176725
							BG	0.00473112	0.00456039	-0.000294769	0.0187144
	antlathla	ACSC	Included	Hawkeye4	BW O3_0.5	16-2	MYO-Norm	0.221665	0.0492194	0.0482731	0.359172	37.5025	2.45663	43.1247	0.615912
							MYO-Def	0.100751	0.0551074	0.0115295	0.255665
							BG	0.00834549	0.00514009	0.000715689	0.0233122
1	antlathla	ACSC	Not Included	Hawkeye4	BW O3_0.5	2-4	MYO-Norm	0.0345729	0.0112216	0.0152035	0.055964	24.401	1.20863	15.8682	0.274991
							MYO-Def	0.0210101	0.00645188	0.0113782	0.0473189
							BG	0.00792302	0.00217876	0.0023473	0.0137652
	antlathla	ACSC	Not Included	Hawkeye4	BW O3_0.5	2-6	MYO-Norm	0.0476479	0.0161663	0.0178682	0.0742855	27.323	1.26498	18.726	0.358829
							MYO-Def	0.0271978	0.00872062	0.0128784	0.0618877
							BG	0.00709107	0.00254448	0.00191137	0.0146443
	antlathla	ACSC	Not Included	Hawkeye4	BW O3_0.5	2-8	MYO-Norm	0.0558639	0.0180412	0.0177808	0.0894829	28.3275	1.36705	20.8764	0.430814
							MYO-Def	0.0312007	0.00997804	0.0135663	0.0681776
							BG	0.00621136	0.00267594	0.00141322	0.0150455
	antlathla	ACSC	Not Included	Hawkeye4	BW O3_0.5	2-16	MYO-Norm	0.0749872	0.0211023	0.013382	0.129589	30.8021	1.6736	27.8984	0.638713
							MYO-Def	0.0396703	0.0136644	0.010494	0.0811324
							BG	0.00420826	0.00268787	0.000472905	0.0149673
	antlathla	ACSC	Not Included	Hawkeye4	BW O3_0.5	2-32	MYO-Norm	0.0902252	0.025709	0.00888543	0.153937	32.4985	1.72157	34.7137	0.913292
							MYO-Def	0.0459653	0.0171652	0.00611537	0.102274
							BG	0.00284588	0.00259912	-0.000217996	0.0142349
	antlathla	ACSC	Not Included	Hawkeye4	BW O3_0.5	4-4	MYO-Norm	0.0574278	0.0189414	0.0179587	0.0914928	28.8088	1.35619	20.9775	0.430039
							MYO-Def	0.0317397	0.0103557	0.0136206	0.0707451
							BG	0.00636591	0.00273759	0.00143753	0.0153919
	antlathla	ACSC	Not Included	Hawkeye4	BW O3_0.5	4-6	MYO-Norm	0.0690702	0.0206139	0.0154046	0.117397	30.182	1.55367	24.853	0.542579
							MYO-Def	0.0370431	0.0123105	0.0127781	0.0783501
							BG	0.00512211	0.00277915	0.000822064	0.0154534
	antlathla	ACSC	Not Included	Hawkeye4	BW O3_0.5	4-8	MYO-Norm	0.077088	0.0217599	0.0135085	0.132436	31.278	1.68813	27.9289	0.637613
							MYO-Def	0.0403544	0.0138915	0.0106271	0.0837285
							BG	0.00432888	0.00276015	0.000479581	0.0153064
	antlathla	ACSC	Not Included	Hawkeye4	BW O3_0.5	4-12	MYO-Norm	0.0867207	0.0238342	0.010832	0.148565	32.3502	1.77871	31.9436	0.794152
							MYO-Def	0.0443266	0.0159947	0.0078862	0.0901609
							BG	0.0034185	0.00271481	6.01241e-05	0.0149295
	antlathla	ACSC	Not Included	Hawkeye4	BW O3_0.5	8-4	MYO-Norm	0.0823089	0.0241856	0.0137485	0.138648	29.0082	1.53046	28.6743	0.649464
							MYO-Def	0.0452937	0.0145777	0.0115604	0.0956922
							BG	0.00441977	0.00287048	0.000497436	0.0164629																done
	antlathla	ACSC	Not Included	Hawkeye4	BW O3_0.5	8-6	MYO-Norm	0.0925588	0.0257812	0.0111972	0.155394	30.0363	1.65854	33.2125	0.819082
							MYO-Def	0.0497996	0.0161842	0.00867799	0.10326
							BG	0.00340243	0.00278687	3.90755e-05	0.0155392
	antlathla	ACSC	Not Included	Hawkeye4	BW O3_0.5	16-2	MYO-Norm	0.121447	0.0273485	0.031272	0.204435	35.143	2.30956	31.5465	0.608494
							MYO-Def	0.0582841	0.0356137	0.00731909	0.179378
							BG	0.00632673	0.00384978	0.000818514	0.0216109
1	antlathla	ACSC	Included	Hawkeye4	BW O3_0.5	2-4	MYO-Norm	0.057437	0.0188693	0.0237801	0.0899513	26.4106	1.27192	16.6293	0.299101
							MYO-Def	0.0334367	0.00968072	0.0181581	0.0748005
							BG	0.0115478	0.00345396	0.00335714	0.0199341
	antlathla	ACSC	Included	Hawkeye4	BW O3_0.5	2-6	MYO-Norm	0.0725559	0.0238155	0.0215711	0.117426	28.4796	1.35065	18.8208	0.379178
							MYO-Def	0.0403895	0.0123478	0.0193283	0.0910393
							BG	0.010167	0.0038551	0.00251283	0.0201523
	antlathla	ACSC	Included	Hawkeye4	BW O3_0.5	2-8	MYO-Norm	0.0826079	0.0257613	0.019218	0.138375	29.7799	1.47163	20.9758	0.435968
							MYO-Def	0.0446967	0.0140364	0.0175685	0.0986482
							BG	0.00903334	0.00393825	0.0019509	0.0199659
	antlathla	ACSC	Included	Hawkeye4	BW O3_0.5	2-16	MYO-Norm	0.107719	0.0298782	0.0132673	0.180333	33.7009	1.8175	26.9909	0.612926
							MYO-Def	0.0534153	0.0184989	0.0110461	0.112402
							BG	0.00651129	0.00399094	0.000748206	0.0197576
	antlathla	ACSC	Included	Hawkeye4	BW O3_0.5	2-32	MYO-Norm	0.1278	0.0373195	0.00776706	0.209207	35.9857	1.81243	28.2547	0.860536
							MYO-Def	0.060161	0.0225316	0.00623545	0.130973
							BG	0.00525619	0.00452314	-0.000344779	0.0202501
	antlathla	ACSC	Included	Hawkeye4	BW O3_0.5	4-4	MYO-Norm	0.0848358	0.0264284	0.0198793	0.141	29.3958	1.45849	21.1623	0.43597
							MYO-Def	0.0462902	0.0148488	0.0178548	0.104386
							BG	0.00919516	0.00400881	0.00196086	0.0203269
	antlathla	ACSC	Included	Hawkeye4	BW O3_0.5	4-6	MYO-Norm	0.0998974	0.0283096	0.0164884	0.16735	31.6345	1.69606	24.7297	0.530711
							MYO-Def	0.0518826	0.017322	0.0137686	0.113785
							BG	0.00761162	0.00403957	0.00128305	0.0200706
	antlathla	ACSC	Included	Hawkeye4	BW O3_0.5	4-8	MYO-Norm	0.110616	0.0301885	0.0140884	0.183626	33.2958	1.83054	26.932	0.617306
							MYO-Def	0.0553547	0.019166	0.0112193	0.119384
							BG	0.00665348	0.00410723	0.00065543	0.0200692
	antlathla	ACSC	Included	Hawkeye4	BW O3_0.5	4-12	MYO-Norm	0.123396	0.0337986	0.0108373	0.202852	34.8332	1.88638	28.2635	0.761882
							MYO-Def	0.0596391	0.021592	0.00806474	0.12538
							BG	0.00573043	0.00436591	-9.01104e-05	0.020337
	antlathla	ACSC	Included	Hawkeye4	BW O3_0.5	8-4	MYO-Norm	0.117962	0.031278	0.0150264	0.189213	29.2779	1.70824	26.8637	0.63071
							MYO-Def	0.0645317	0.0189158	0.0122456	0.136965
							BG	0.0069622	0.00439113	0.000552841	0.0219867
	antlathla	ACSC	Included	Hawkeye4	BW O3_0.5	8-6	MYO-Norm	0.131675	0.0343558	0.0119347	0.208989	30.6774	1.7995	27.5258	0.813275
							MYO-Def	0.0698518	0.0207186	0.00897807	0.144668
							BG	0.00588202	0.0047837	-0.000128452	0.0222922
	antlathla	ACSC	Included	Hawkeye4	BW O3_0.5	16-2	MYO-Norm	0.179995	0.0375687	0.0463686	0.271408	38.8888	2.683	31.0706	0.544992
							MYO-Def	0.079198	0.04208	0.014294	0.226896
							BG	0.0106297	0.0057931	0.00130154	0.0327781
AVG	antlathla	ACSC	Not Included	Hawkeye4	BW O3_0.5	2-4	MYO-Norm	0.0530169	0.0188179	0.0202903	0.0946106	27.0257	1.19822	19.3197	1.22313
							MYO-Def	0.0303035	0.00992539	0.0160126	0.0760976
							BG	0.00760155	0.00270523	0.00203544	0.0137732
	antlathla	ACSC	Not Included	Hawkeye4	BW O3_0.5	2-6	MYO-Norm	0.072927	0.0242839	0.0238964	0.123678	29.3043	1.35249	26.4227	1.83187
							MYO-Def	0.0397065	0.0130597	0.0174069	0.0978058
							BG	0.00626906	0.00274543	0.00172293	0.0131937
	antlathla	ACSC	Not Included	Hawkeye4	BW O3_0.5	2-8	MYO-Norm	0.0842474	0.0243096	0.024907	0.132486	29.8709	1.58332	33.1989	0.501218
							MYO-Def	0.0453203	0.0146906	0.0168149	0.104453
							BG	0.00517161	0.00256671	0.00135757	0.012554
	antlathla	ACSC	Not Included	Hawkeye4	BW O3_0.5	2-16	MYO-Norm	0.107055	0.0243084	0.0208944	0.152808	31.6422	2.11831	51.7161	28.4373
							MYO-Def	0.055472	0.0194913	0.0109336	0.126313
							BG	0.00308314	0.00222211	0.000392277	0.0107058
	antlathla	ACSC	Not Included	Hawkeye4	BW O3_0.5	2-32	MYO-Norm	0.122547	0.0300554	0.0169532	0.189392	32.6756	2.0169	73.4176	-81.7292
							MYO-Def	0.0621577	0.0239878	0.00437915	0.160908
							BG	0.00187261	0.00193922	-0.000400864	0.00928971
	antlathla	ACSC	Not Included	Hawkeye4	BW O3_0.5	4-4	MYO-Norm	0.0863695	0.0255447	0.02528	0.138055	30.0713	1.55205	32.7208	0.503029
							MYO-Def	0.0462872	0.0152373	0.0170661	0.109075
							BG	0.00532863	0.00266971	0.00138406	0.0129139
	antlathla	ACSC	Not Included	Hawkeye4	BW O3_0.5	4-6	MYO-Norm	0.10074	0.0245427	0.0234679	0.147399	30.9992	1.93692	43.5488	0.616512
							MYO-Def	0.0529266	0.0177644	0.0140762	0.115481
							BG	0.00393823	0.00241445	0.000795327	0.0116434
	antlathla	ACSC	Not Included	Hawkeye4	BW O3_0.5	4-8	MYO-Norm	0.109566	0.0249735	0.0215789	0.155881	31.76	2.11556	52.0321	0.725762
							MYO-Def	0.0566471	0.0197458	0.0111668	0.127053
							BG	0.00313985	0.00225509	0.000403455	0.0107214
	antlathla	ACSC	Not Included	Hawkeye4	BW O3_0.5	4-12	MYO-Norm	0.119649	0.0275599	0.0192337	0.176389	32.4965	2.13589	63.2102	0.92184
							MYO-Def	0.0609294	0.0223921	0.00713359	0.146889
							BG	0.00234638	0.00211734	-5.13899e-05	0.0100266
	antlathla	ACSC	Not Included	Hawkeye4	BW O3_0.5	8-4	MYO-Norm	0.117286	0.028056	0.0221511	0.169502	29.9763	1.92369	54.7593	0.70295
							MYO-Def	0.0630338	0.0210559	0.0126526	0.138237
							BG	0.00330145	0.00231049	0.000444675	0.0113689
	antlathla	ACSC	Not Included	Hawkeye4	BW O3_0.5	8-6	MYO-Norm	0.127787	0.029857	0.019953	0.189321	30.5569	2.00626	68.1864	0.90979
							MYO-Def	0.0678773	0.0235309	0.00851295	0.155743
							BG	0.00237111	0.00212318	-5.97204e-05	0.0103051
	antlathla	ACSC	Not Included	Hawkeye4	BW O3_0.5	16-2	MYO-Norm	0.159843	0.0367751	0.0443813	0.256019	35.3418	2.26763	59.715	0.623553
							MYO-Def	0.0764331	0.0446511	0.00564104	0.223278
							BG	0.00470383	0.00293211	0.00070914	0.0150617
AVG	antlathla	ACSC	Included	Hawkeye4	BW O3_0.5	2-4	MYO-Norm	0.0858102	0.0287809	0.0314163	0.145724	28.5522	1.32418	19.4353	0.393537
							MYO-Def	0.047426	0.0149245	0.0250449	0.115169
							BG	0.0113197	0.00436461	0.0031265	0.0205554
	antlathla	ACSC	Included	Hawkeye4	BW O3_0.5	2-6	MYO-Norm	0.107283	0.0316023	0.0322747	0.169829	29.847	1.55504	25.2491	0.463216
							MYO-Def	0.0576889	0.0180057	0.0250601	0.134471
							BG	0.0093273	0.00425357	0.00250551	0.0202686
	antlathla	ACSC	Included	Hawkeye4	BW O3_0.5	2-8	MYO-Norm	0.120297	0.0308148	0.0295285	0.178603	30.6643	1.82769	30.5727	0.512897
							MYO-Def	0.0635763	0.0197698	0.0224674	0.140518
							BG	0.0078851	0.00399579	0.00198685	0.0191994
	antlathla	ACSC	Included	Hawkeye4	BW O3_0.5	2-16	MYO-Norm	0.148532	0.0323369	0.0224726	0.212884	33.2657	2.29545	44.9538	65.7433
							MYO-Def	0.0742913	0.0248367	0.0142787	0.162295
							BG	0.00498081	0.0034969	0.00045965	0.0159572
	antlathla	ACSC	Included	Hawkeye4	BW O3_0.5	2-32	MYO-Norm	0.168157	0.0407264	0.0177532	0.254932	34.4162	2.11929	51.0722	-27.1414
							MYO-Def	0.0820824	0.0299301	0.00670753	0.202206
							BG	0.00377897	0.00371174	-0.000509279	0.0159531
	antlathla	ACSC	Included	Hawkeye4	BW O3_0.5	4-4	MYO-Norm	0.124656	0.0326146	0.030676	0.187462	30.1451	1.76387	30.113	0.516709
							MYO-Def	0.0666667	0.0208946	0.023349	0.151107
							BG	0.00820684	0.00418922	0.00203596	0.0200495
	antlathla	ACSC	Included	Hawkeye4	BW O3_0.5	4-6	MYO-Norm	0.142526	0.0316113	0.0262388	0.202965	31.673	2.1669	38.1576	0.617138
							MYO-Def	0.0737873	0.0234923	0.0184885	0.15606
							BG	0.00633684	0.00387158	0.00113993	0.0181249
	antlathla	ACSC	Included	Hawkeye4	BW O3_0.5	4-8	MYO-Norm	0.153945	0.0329657	0.023487	0.218616	32.7058	2.30377	43.2255	0.720031
							MYO-Def	0.0779798	0.0255802	0.0148434	0.166455
							BG	0.00529591	0.00376579	0.000437888	0.0170741
	antlathla	ACSC	Included	Hawkeye4	BW O3_0.5	4-12	MYO-Norm	0.167057	0.0372492	0.0202506	0.245473	33.5907	2.25983	48.2228	0.899697
							MYO-Def	0.083072	0.0285596	0.00986728	0.190061
							BG	0.00429608	0.00377754	-0.000260012	0.0165918
	antlathla	ACSC	Included	Hawkeye4	BW O3_0.5	8-4	MYO-Norm	0.161469	0.0347419	0.0243356	0.227608	29.6368	2.12845	44.0118	0.700106
							MYO-Def	0.0873081	0.0265678	0.016499	0.179935
							BG	0.00562589	0.00390733	0.000452269	0.017748
	antlathla	ACSC	Included	Hawkeye4	BW O3_0.5	8-6	MYO-Norm	0.174846	0.0379683	0.0214185	0.252169	30.3714	2.15231	46.8275	0.923948
							MYO-Def	0.0931513	0.0292969	0.0118478	0.200612
							BG	0.00455026	0.00412746	-0.00028764	0.0178034
	antlathla	ACSC	Included	Hawkeye4	BW O3_0.5	16-2	MYO-Norm	0.227444	0.0495972	0.0512691	0.356183	38.2444	2.55536	55.3828	0.584165
							MYO-Def	0.101521	0.0554695	0.0117157	0.276272
							BG	0.00792868	0.00465549	0.000851443	0.0227846
	Below are extra 8 frames to increase sample size for statistical test.
8	antlathla	ACSC	Not Included	Hawkeye4	BW O3_0.5	2-4	MYO-Norm	0.0407505	0.0163638	0.0160009	0.0731621	26.2577	1.0358	14.8774	7.33951
							MYO-Def	0.0238008	0.00814524	0.0121636	0.0579767
							BG	0.0076784	0.00273909	0.00222955	0.0135308
	antlathla	ACSC	Not Included	Hawkeye4	BW O3_0.5	2-6	MYO-Norm	0.0559485	0.0224488	0.0189933	0.0997122	28.2893	1.09915	18.407	12.0762
							MYO-Def	0.0312739	0.0112413	0.0134601	0.0764198
							BG	0.00686931	0.00303953	0.00185893	0.0136929
	antlathla	ACSC	Not Included	Hawkeye4	BW O3_0.5	2-8	MYO-Norm	0.0647834	0.0232654	0.0209542	0.10783	28.4883	1.23477	21.0223	0.507587
							MYO-Def	0.036056	0.0127146	0.0134994	0.0835699
							BG	0.00607118	0.00308165	0.00151472	0.0141292
	antlathla	ACSC	Not Included	Hawkeye4	BW O3_0.5	2-16	MYO-Norm	0.0841054	0.0214926	0.0194737	0.127085	29.9495	1.80377	28.5989	30.1151
							MYO-Def	0.0453378	0.0158546	0.0110376	0.0948017
							BG	0.00429464	0.00294086	0.000713683	0.0124595
	antlathla	ACSC	Not Included	Hawkeye4	BW O3_0.5	2-32	MYO-Norm	0.0982936	0.0232357	0.015776	0.152817	31.1064	2.00736	33.1321	-871.171
							MYO-Def	0.0516512	0.0185205	0.00569459	0.131086
							BG	0.00315722	0.00296672	-2.66718e-05	0.0119377
	antlathla	ACSC	Not Included	Hawkeye4	BW O3_0.5	4-4	MYO-Norm	0.0664413	0.0245133	0.0207166	0.112682	28.8776	1.21465	21.0616	0.504163
							MYO-Def	0.0366663	0.0132338	0.0136157	0.0865132
							BG	0.00625714	0.00315462	0.00156093	0.0143969
	antlathla	ACSC	Not Included	Hawkeye4	BW O3_0.5	4-6	MYO-Norm	0.0782423	0.0233354	0.0216375	0.11783	29.4708	1.52643	25.276	0.601281
							MYO-Def	0.0426225	0.014943	0.0124625	0.0938136
							BG	0.00514821	0.00309552	0.00107256	0.0135026
	antlathla	ACSC	Not Included	Hawkeye4	BW O3_0.5	4-8	MYO-Norm	0.086022	0.0223679	0.0199508	0.129535	30.2335	1.78558	28.2516	0.684005
							MYO-Def	0.0460823	0.0161378	0.0110909	0.0979341
							BG	0.0044515	0.00304485	0.00072199	0.012791
	antlathla	ACSC	Not Included	Hawkeye4	BW O3_0.5	4-12	MYO-Norm	0.0952762	0.02242	0.0181806	0.145407	31.0943	2.01593	31.2891	0.827929
							MYO-Def	0.050079	0.0176629	0.00801215	0.117231
							BG	0.00367789	0.00304503	0.000305303	0.0124659
	antlathla	ACSC	Not Included	Hawkeye4	BW O3_0.5	8-4	MYO-Norm	0.091666	0.0259768	0.0199922	0.142701	28.5516	1.56749	29.186	0.676664
							MYO-Def	0.0509475	0.0166536	0.0128614	0.110534
							BG	0.00464152	0.00314075	0.000769448	0.0136324
	antlathla	ACSC	Not Included	Hawkeye4	BW O3_0.5	8-6	MYO-Norm	0.101156	0.0253152	0.0189227	0.155692	29.2215	1.80721	31.8896	0.840237
							MYO-Def	0.0554062	0.0175585	0.00979069	0.117716
							BG	0.00377521	0.00317207	0.000332667	0.0129465
	antlathla	ACSC	Not Included	Hawkeye4	BW O3_0.5	16-2	MYO-Norm	0.130677	0.0303845	0.0414118	0.218111	36.0966	2.28137	32.0818	0.615684
							MYO-Def	0.0613587	0.0373843	0.00613944	0.18612
							BG	0.0066158	0.00407324	0.00101772	0.0202973
8	antlathla	ACSC	Included	Hawkeye4	BW O3_0.5	2-4	MYO-Norm	0.0677846	0.0262043	0.0270504	0.116511	27.5411	1.11717	15.5205	0.39035
							MYO-Def	0.0385099	0.0125573	0.0196825	0.0899104
							BG	0.0111885	0.00436743	0.0032445	0.0205357
	antlathla	ACSC	Included	Hawkeye4	BW O3_0.5	2-6	MYO-Norm	0.0846748	0.0304545	0.0302299	0.1369	28.4947	1.23314	18.6709	0.455834
							MYO-Def	0.0471202	0.0158157	0.0199936	0.109146
							BG	0.00994903	0.00453511	0.00272095	0.0227548
	antlathla	ACSC	Included	Hawkeye4	BW O3_0.5	2-8	MYO-Norm	0.0951951	0.0302609	0.0285841	0.143131	29.1268	1.41918	21.2287	0.499896
							MYO-Def	0.0522493	0.0173323	0.0190051	0.117406
							BG	0.00897038	0.00448426	0.00227323	0.0229485
	antlathla	ACSC	Included	Hawkeye4	BW O3_0.5	2-16	MYO-Norm	0.12022	0.0281796	0.0228754	0.177371	31.9186	2.06448	26.7556	0.648492
							MYO-Def	0.0620439	0.0204611	0.0144498	0.129588
							BG	0.00692878	0.00449326	0.000869636	0.0183517
	antlathla	ACSC	Included	Hawkeye4	BW O3_0.5	2-32	MYO-Norm	0.138851	0.0325702	0.0194095	0.209294	33.2309	2.12665	25.6731	0.866033
							MYO-Def	0.0695857	0.0238317	0.00733582	0.161172
							BG	0.00624505	0.00540842	-0.000507858	0.0189763
	antlathla	ACSC	Included	Hawkeye4	BW O3_0.5	4-4	MYO-Norm	0.09805	0.0319018	0.0292732	0.148772	28.8223	1.37531	21.0637	0.50134
							MYO-Def	0.0541752	0.0183218	0.0193742	0.124834
							BG	0.00928496	0.00465492	0.00229033	0.0234855
	antlathla	ACSC	Included	Hawkeye4	BW O3_0.5	4-6	MYO-Norm	0.113171	0.0297167	0.025517	0.165044	30.3266	1.77237	24.4079	0.58149
							MYO-Def	0.0605019	0.0199185	0.0167367	0.134027
							BG	0.00797376	0.00463666	0.00144959	0.0213886
	antlathla	ACSC	Included	Hawkeye4	BW O3_0.5	4-8	MYO-Norm	0.12353	0.0288077	0.0234379	0.181664	31.4925	2.054	25.9566	0.657376
							MYO-Def	0.0643591	0.0211088	0.0145959	0.138471
							BG	0.00723952	0.00475909	0.000877655	0.0185833
	antlathla	ACSC	Included	Hawkeye4	BW O3_0.5	4-12	MYO-Norm	0.135885	0.0301881	0.0212409	0.202854	32.5405	2.21025	26.0167	0.784353
							MYO-Def	0.0691618	0.0229552	0.00999154	0.148355
							BG	0.00665898	0.00522299	1.68833e-05	0.0190015
	antlathla	ACSC	Included	Hawkeye4	BW O3_0.5	8-4	MYO-Norm	0.129335	0.0315753	0.0243979	0.186223	27.9875	1.79141	25.5928	0.649674
							MYO-Def	0.0727707	0.020447	0.0181354	0.153813
							BG	0.00777862	0.00505357	0.000924855	0.0190372
	antlathla	ACSC	Included	Hawkeye4	BW O3_0.5	8-6	MYO-Norm	0.141924	0.0320344	0.0225007	0.211103	28.8637	1.98468	24.3145	0.821744
							MYO-Def	0.078346	0.0216258	0.0140079	0.157388
							BG	0.0071032	0.00583701	-1.01141e-05	0.0198853
	antlathla	ACSC	Included	Hawkeye4	BW O3_0.5	16-2	MYO-Norm	0.193393	0.0385473	0.0536451	0.297214	38.7924	2.80451	28.3292	0.598098
							MYO-Def	0.0852866	0.0462543	0.0122872	0.235899
							BG	0.0114139	0.00682663	0.000875328	0.0297037
7	antlathla	ACSC	Not Included	Hawkeye4	BW O3_0.5	2-4	MYO-Norm	0.0451822	0.0169144	0.0179456	0.0789818	26.6009	1.12253	16.9641	0.363345
							MYO-Def	0.0261952	0.00877836	0.0138812	0.0616375
							BG	0.00733023	0.0026634	0.0019823	0.013252
	antlathla	ACSC	Not Included	Hawkeye4	BW O3_0.5	2-6	MYO-Norm	0.0622428	0.0223854	0.0220104	0.106312	28.8208	1.24415	22.0406	0.449755
							MYO-Def	0.0343919	0.0117641	0.0152094	0.0792396
							BG	0.00627899	0.00282401	0.00171636	0.0131198
	antlathla	ACSC	Not Included	Hawkeye4	BW O3_0.5	2-8	MYO-Norm	0.0722337	0.0224727	0.0239049	0.113951	29.2498	1.45481	26.1544	0.51575
							MYO-Def	0.0395401	0.0132484	0.0146261	0.0852088
							BG	0.00535496	0.00276182	0.00145595	0.0127097
	antlathla	ACSC	Not Included	Hawkeye4	BW O3_0.5	2-16	MYO-Norm	0.0938363	0.0204918	0.0203454	0.135751	31.0133	2.16797	38.1327	0.717084
							MYO-Def	0.0494107	0.0173144	0.00993188	0.111657
							BG	0.00343165	0.00246078	0.000572738	0.0113091
	antlathla	ACSC	Not Included	Hawkeye4	BW O3_0.5	2-32	MYO-Norm	0.109308	0.024624	0.0168205	0.166243	32.1515	2.15999	46.5416	1.01778
							MYO-Def	0.0561203	0.0208841	0.00473973	0.152273
							BG	0.00230758	0.00234861	-0.000526127	0.0111824
	antlathla	ACSC	Not Included	Hawkeye4	BW O3_0.5	4-4	MYO-Norm	0.0740972	0.0237688	0.0242667	0.11903	29.5623	1.4226	26.2431	0.512652
							MYO-Def	0.0402836	0.0137544	0.0148571	0.089103
							BG	0.00550762	0.00282349	0.00147739	0.0130781
	antlathla	ACSC	Not Included	Hawkeye4	BW O3_0.5	4-6	MYO-Norm	0.0873915	0.0218766	0.022751	0.124553	30.3904	1.86213	32.9374	0.6192
							MYO-Def	0.0466544	0.015885	0.0124069	0.0948234
							BG	0.00428498	0.00265326	0.00105289	0.012242
	antlathla	ACSC	Not Included	Hawkeye4	BW O3_0.5	4-8	MYO-Norm	0.0959803	0.0211831	0.0208499	0.137628	31.2048	2.15523	37.7168	0.716688
							MYO-Def	0.0503258	0.0175473	0.0100437	0.112613
							BG	0.00355072	0.00254476	0.00059139	0.0118166
	antlathla	ACSC	Not Included	Hawkeye4	BW O3_0.5	4-12	MYO-Norm	0.106042	0.0225514	0.0186787	0.153703	32.0405	2.28206	43.1004	0.888556
							MYO-Def	0.0545784	0.0196695	0.00670573	0.137498
							BG	0.00276893	0.00246035	-2.55038e-05	0.0116196
	antlathla	ACSC	Not Included	Hawkeye4	BW O3_0.5	8-4	MYO-Norm	0.102283	0.0246566	0.0218475	0.149781	29.2754	1.87883	39.0085	0.701531
							MYO-Def	0.0559575	0.0181846	0.01179	0.114689
							BG	0.00373764	0.00262207	0.00068552	0.0127637
	antlathla	ACSC	Not Included	Hawkeye4	BW O3_0.5	8-6	MYO-Norm	0.112654	0.0249987	0.0197278	0.167041	29.9365	2.07648	44.1678	0.889777
							MYO-Def	0.0607446	0.0198297	0.00826385	0.14008
							BG	0.00286655	0.00255059	1.73244e-05	0.0124951
	antlathla	ACSC	Not Included	Hawkeye4	BW O3_0.5	16-2	MYO-Norm	0.142969	0.0309519	0.0456572	0.23889	34.9222	2.39113	41.0405	0.639084
							MYO-Def	0.0689591	0.0420889	0.00488804	0.189365
							BG	0.00545094	0.00348361	0.000757111	0.0169811
7	antlathla	ACSC	Included	Hawkeye4	BW O3_0.5	2-4	MYO-Norm	0.0744181	0.0261423	0.0304169	0.126877	28.1846	1.25182	17.3637	0.401973
							MYO-Def	0.0416927	0.0131462	0.0230998	0.0921566
							BG	0.010662	0.00428584	0.00285559	0.0192673
	antlathla	ACSC	Included	Hawkeye4	BW O3_0.5	2-6	MYO-Norm	0.0933414	0.0291613	0.0323541	0.148613	29.3321	1.45189	21.9064	0.467036
							MYO-Def	0.0510024	0.0162657	0.0236146	0.109253
							BG	0.00912333	0.00426092	0.00241628	0.0190911
	antlathla	ACSC	Included	Hawkeye4	BW O3_0.5	2-8	MYO-Norm	0.105249	0.0281476	0.0290895	0.153613	30.0826	1.72943	25.8595	0.510473
							MYO-Def	0.0565697	0.0178833	0.0220809	0.115874
							BG	0.00797307	0.00407004	0.00207819	0.0183223
	antlathla	ACSC	Included	Hawkeye4	BW O3_0.5	2-16	MYO-Norm	0.133048	0.0272708	0.0223839	0.190591	32.8839	2.41463	35.3418	0.670642
							MYO-Def	0.067199	0.0219907	0.0153937	0.134487
							BG	0.00561344	0.00376461	0.000721834	0.0171011
	antlathla	ACSC	Included	Hawkeye4	BW O3_0.5	2-32	MYO-Norm	0.153221	0.0348513	0.0179293	0.226705	34.0452	2.23323	35.76	0.920651
							MYO-Def	0.0753899	0.0259244	0.008984	0.180224
							BG	0.00465399	0.0042847	-0.000560518	0.0181547
	antlathla	ACSC	Included	Hawkeye4	BW O3_0.5	4-4	MYO-Norm	0.10886	0.0298794	0.0301972	0.162458	29.7077	1.6689	25.4895	0.51551
							MYO-Def	0.0589943	0.0189881	0.0229606	0.124592
							BG	0.00828455	0.00427077	0.00201416	0.0191145
	antlathla	ACSC	Included	Hawkeye4	BW O3_0.5	4-6	MYO-Norm	0.125936	0.0275174	0.0259496	0.176699	31.2814	2.181	31.0304	0.600182
							MYO-Def	0.0659206	0.0210586	0.018989	0.131565
							BG	0.00676207	0.00405847	0.00143915	0.0182068
	antlathla	ACSC	Included	Hawkeye4	BW O3_0.5	4-8	MYO-Norm	0.137385	0.027728	0.0234326	0.193576	32.4207	2.42615	34.0159	0.685235
							MYO-Def	0.0701127	0.0226712	0.0158133	0.137854
							BG	0.00589411	0.00403885	0.000659451	0.0181627
	antlathla	ACSC	Included	Hawkeye4	BW O3_0.5	4-12	MYO-Norm	0.150858	0.0313008	0.0205628	0.214619	33.389	2.41283	35.3029	0.833198
							MYO-Def	0.0753345	0.0249323	0.0118029	0.167669
							BG	0.00512873	0.00427325	-0.000185409	0.0187224
	antlathla	ACSC	Included	Hawkeye4	BW O3_0.5	8-4	MYO-Norm	0.142866	0.0297067	0.0244368	0.202912	28.6085	2.13959	33.1739	0.680402
							MYO-Def	0.0793059	0.0225263	0.0199094	0.149906
							BG	0.00632946	0.00430658	0.000679614	0.0193369
	antlathla	ACSC	Included	Hawkeye4	BW O3_0.5	8-6	MYO-Norm	0.156549	0.0320516	0.0218573	0.222477	29.4379	2.22165	32.5191	0.875257
							MYO-Def	0.0853416	0.0242553	0.0160677	0.17107
							BG	0.00550017	0.00481406	-0.000193623	0.0203837
	antlathla	ACSC	Included	Hawkeye4	BW O3_0.5	16-2	MYO-Norm	0.207943	0.0422605	0.0565046	0.32582	37.4209	2.67979	36.1578	0.613186
							MYO-Def	0.0946937	0.0529536	0.0119672	0.247584
							BG	0.00937887	0.00575099	0.000399062	0.03151
6	antlathla	ACSC	Not Included	Hawkeye4	BW O3_0.5	2-4	MYO-Norm	0.061399	0.0219945	0.0237529	0.111126	28.9895	1.25477	21.8092	0.390959
							MYO-Def	0.033801	0.0112987	0.0180664	0.0864241
							BG	0.00720096	0.00281528	0.00179396	0.0134519
	antlathla	ACSC	Not Included	Hawkeye4	BW O3_0.5	2-6	MYO-Norm	0.0842802	0.027582	0.029928	0.143392	30.9548	1.44456	31.7406	0.466153
							MYO-Def	0.0444363	0.0148397	0.0194618	0.110345
							BG	0.00569616	0.00265528	0.00154609	0.012628
	antlathla	ACSC	Not Included	Hawkeye4	BW O3_0.5	2-8	MYO-Norm	0.0969179	0.0266809	0.0329769	0.149987	31.2886	1.73138	40.9306	0.521031
							MYO-Def	0.0507231	0.0166981	0.0180739	0.117739
							BG	0.00454457	0.00236786	0.00122589	0.0114162
	antlathla	ACSC	Not Included	Hawkeye4	BW O3_0.5	2-16	MYO-Norm	0.121252	0.0254198	0.0290975	0.168822	32.5119	2.34064	69.6102	0.727844
							MYO-Def	0.0617535	0.0223492	0.00972019	0.152252
							BG	0.00239319	0.00174187	0.000330791	0.00885229
	antlathla	ACSC	Not Included	Hawkeye4	BW O3_0.5	2-32	MYO-Norm	0.136875	0.0322719	0.0251033	0.217339	33.0582	2.1075	99.2805	1.09048
							MYO-Def	0.068862	0.0276815	0.00231812	0.191433
							BG	0.00126428	0.00137867	-0.000215884	0.0071592
	antlathla	ACSC	Not Included	Hawkeye4	BW O3_0.5	4-4	MYO-Norm	0.0992701	0.0280303	0.0339959	0.156346	31.4031	1.69273	40.8401	0.518364
							MYO-Def	0.0518224	0.017309	0.0185507	0.123141
							BG	0.00468918	0.0024307	0.00124866	0.0118704
	antlathla	ACSC	Not Included	Hawkeye4	BW O3_0.5	4-6	MYO-Norm	0.114836	0.0258327	0.0315305	0.161804	32.0393	2.15734	56.5032	0.620602
							MYO-Def	0.0591062	0.0202732	0.0138851	0.131952
							BG	0.00327485	0.00203238	0.000754159	0.0102229
	antlathla	ACSC	Not Included	Hawkeye4	BW O3_0.5	4-8	MYO-Norm	0.12402	0.0261442	0.0301906	0.16914	32.5605	2.33036	68.6536	0.727007
							MYO-Def	0.0630945	0.0226026	0.0100563	0.152372
							BG	0.00248479	0.00180646	0.000348149	0.00925038
	antlathla	ACSC	Not Included	Hawkeye4	BW O3_0.5	4-12	MYO-Norm	0.134259	0.0293302	0.0290996	0.198777	32.9803	2.27052	85.9913	0.927193
							MYO-Def	0.0676642	0.0257302	0.00519692	0.176863
							BG	0.00168391	0.00156131	-4.42494e-05	0.00814449
	antlathla	ACSC	Not Included	Hawkeye4	BW O3_0.5	8-4	MYO-Norm	0.13285	0.0293502	0.032956	0.184006	30.8817	2.13601	74.0202	0.677094
							MYO-Def	0.0701578	0.0241914	0.0116184	0.161558
							BG	0.00265071	0.00179478	0.000429401	0.0099024
	antlathla	ACSC	Not Included	Hawkeye4	BW O3_0.5	8-6	MYO-Norm	0.143507	0.0316404	0.0323141	0.214698	31.1541	2.15474	92.8283	0.883808
							MYO-Def	0.0753303	0.0272968	0.00644713	0.188385
							BG	0.00174918	0.00154594	-6.32133e-05	0.00864634
	antlathla	ACSC	Not Included	Hawkeye4	BW O3_0.5	16-2	MYO-Norm	0.177588	0.0414083	0.0663137	0.294699	36.436	2.29064	76.6189	0.602424
							MYO-Def	0.0827363	0.0484122	0.0047252	0.252755
							BG	0.00384747	0.00231781	0.000683261	0.0128049
6	antlathla	ACSC	Included	Hawkeye4	BW O3_0.5	2-4	MYO-Norm	0.0985881	0.0328788	0.0374926	0.168315	30.2016	1.39108	21.8054	0.439585
							MYO-Def	0.052851	0.0172156	0.0269745	0.133045
							BG	0.0102853	0.00452126	0.00273057	0.0187232
	antlathla	ACSC	Included	Hawkeye4	BW O3_0.5	2-6	MYO-Norm	0.122809	0.0348002	0.0413253	0.193361	31.2109	1.67886	30.1113	0.497606
							MYO-Def	0.0643843	0.0205107	0.0266263	0.156018
							BG	0.00819624	0.0040785	0.00230794	0.0172493
	antlathla	ACSC	Included	Hawkeye4	BW O3_0.5	2-8	MYO-Norm	0.137084	0.0328572	0.0387444	0.198189	31.8062	2.01355	37.6328	0.538625
							MYO-Def	0.0709244	0.0224201	0.024227	0.163135
							BG	0.00676291	0.00364267	0.00193258	0.0148039
	antlathla	ACSC	Included	Hawkeye4	BW O3_0.5	2-16	MYO-Norm	0.166406	0.0335026	0.0335569	0.226808	33.6789	2.50274	56.1094	0.733493
							MYO-Def	0.0825577	0.0282036	0.0140306	0.184142
							BG	0.00404331	0.00296574	0.000286916	0.0115215
	antlathla	ACSC	Included	Hawkeye4	BW O3_0.5	2-32	MYO-Norm	0.185791	0.0424924	0.0323995	0.281137	34.3448	2.23555	61.0713	1.0582
							MYO-Def	0.0907972	0.0339746	0.00500523	0.228714
							BG	0.00287489	0.0030422	-0.000509809	0.012476
	antlathla	ACSC	Included	Hawkeye4	BW O3_0.5	4-4	MYO-Norm	0.142515	0.0353579	0.0408026	0.212544	31.3058	1.92196	36.8929	0.545475
							MYO-Def	0.0745585	0.0236134	0.025526	0.176775
							BG	0.00708179	0.00386294	0.00191342	0.0156731
	antlathla	ACSC	Included	Hawkeye4	BW O3_0.5	4-6	MYO-Norm	0.161523	0.0331597	0.0374018	0.217009	32.4533	2.38699	47.7956	0.642944
							MYO-Def	0.0823712	0.0265429	0.020054	0.181496
							BG	0.00525621	0.00337945	0.00104977	0.013545
	antlathla	ACSC	Included	Hawkeye4	BW O3_0.5	4-8	MYO-Norm	0.173165	0.0344252	0.0355453	0.231706	33.1671	2.50567	54.2561	0.750302
							MYO-Def	0.0869067	0.0289323	0.0152376	0.186443
							BG	0.00425378	0.00319162	0.000306926	0.0125375
	antlathla	ACSC	Included	Hawkeye4	BW O3_0.5	4-12	MYO-Norm	0.186266	0.0390418	0.0340058	0.266447	33.7	2.4051	59.2862	0.941496
							MYO-Def	0.0923667	0.0323269	0.00885057	0.215448
							BG	0.00333704	0.00314181	-0.000318415	0.011813
	antlathla	ACSC	Included	Hawkeye4	BW O3_0.5	8-4	MYO-Norm	0.181191	0.0365524	0.0371421	0.241926	30.5571	2.32039	55.1452	0.709232
							MYO-Def	0.096375	0.030461	0.0179455	0.200678
							BG	0.00463277	0.00328571	0.000358503	0.0129048
	antlathla	ACSC	Included	Hawkeye4	BW O3_0.5	8-6	MYO-Norm	0.194471	0.0400085	0.036431	0.276127	30.9834	2.29956	57.1194	0.946596
							MYO-Def	0.102469	0.0337504	0.011592	0.224157
							BG	0.00359672	0.00340464	-0.00031586	0.0134982
	antlathla	ACSC	Included	Hawkeye4	BW O3_0.5	16-2	MYO-Norm	0.248673	0.0553833	0.0741648	0.38278	39.2334	2.53042	66.2116	0.597743
							MYO-Def	0.10853	0.0609028	0.00980752	0.31737
							BG	0.00628318	0.00375573	0.000567125	0.0170931
5	antlathla	ACSC	Not Included	Hawkeye4	BW O3_0.5	2-4	MYO-Norm	0.0696997	0.0255898	0.0239826	0.134372	28.7921	1.21781	20.8164	0.414271
							MYO-Def	0.0385363	0.0131765	0.0187821	0.105114
							BG	0.00808242	0.00334831	0.00220306	0.014887
	antlathla	ACSC	Not Included	Hawkeye4	BW O3_0.5	2-6	MYO-Norm	0.0949813	0.0315641	0.0290132	0.171219	30.6612	1.41227	30.6467	0.488485
							MYO-Def	0.0504043	0.017023	0.0204895	0.132435
							BG	0.00634458	0.00309923	0.00178322	0.0146336
	antlathla	ACSC	Not Included	Hawkeye4	BW O3_0.5	2-8	MYO-Norm	0.108476	0.0307758	0.0278779	0.178086	31.0782	1.6714	39.8834	0.545038
							MYO-Def	0.0570374	0.0189962	0.0184301	0.138374
							BG	0.00499017	0.00271983	0.00127368	0.013531
	antlathla	ACSC	Not Included	Hawkeye4	BW O3_0.5	2-16	MYO-Norm	0.133097	0.0305825	0.0206826	0.182002	32.4091	2.13046	70.8189	0.766889
							MYO-Def	0.0679421	0.0246866	0.00970392	0.162382
							BG	0.00245068	0.0018794	0.000147005	0.00858894
	antlathla	ACSC	Not Included	Hawkeye4	BW O3_0.5	2-32	MYO-Norm	0.1483	0.0377171	0.0159377	0.222568	33.013	1.95175	111.509	1.16268
							MYO-Def	0.0746858	0.0300846	0.00264943	0.197213
							BG	0.00114386	0.00132994	-0.000840574	0.00606674
	antlathla	ACSC	Not Included	Hawkeye4	BW O3_0.5	4-4	MYO-Norm	0.11111	0.0322357	0.0287934	0.184833	31.0964	1.63518	39.5145	0.543279
							MYO-Def	0.0583988	0.0195871	0.0188137	0.144184
							BG	0.00517576	0.00281188	0.00133322	0.0136608
	antlathla	ACSC	Not Included	Hawkeye4	BW O3_0.5	4-6	MYO-Norm	0.127054	0.0307301	0.0243301	0.187162	31.8224	1.99617	55.802	0.65145
							MYO-Def	0.0657114	0.0226095	0.0137473	0.147129
							BG	0.00349508	0.00227687	0.000651327	0.0109596
	antlathla	ACSC	Not Included	Hawkeye4	BW O3_0.5	4-8	MYO-Norm	0.136151	0.0314692	0.0215477	0.188221	32.3509	2.11507	69.3184	0.766506
							MYO-Def	0.0695915	0.0249136	0.00990043	0.161443
							BG	0.00256246	0.00196414	0.000163139	0.00887237
	antlathla	ACSC	Not Included	Hawkeye4	BW O3_0.5	4-12	MYO-Norm	0.146147	0.0348855	0.0184148	0.204767	32.7796	2.06846	90.9598	0.985403
							MYO-Def	0.0739878	0.0280603	0.005218	0.183127
							BG	0.00163052	0.00160672	-0.00026348	0.00729955
	antlathla	ACSC	Not Included	Hawkeye4	BW O3_0.5	8-4	MYO-Norm	0.146239	0.0351898	0.0224939	0.206168	30.9736	1.96555	72.3221	0.742882
							MYO-Def	0.0770717	0.0272801	0.0110037	0.173331
							BG	0.0027219	0.00202205	0.000169984	0.00965515
	antlathla	ACSC	Not Included	Hawkeye4	BW O3_0.5	8-6	MYO-Norm	0.156674	0.0380053	0.0194229	0.223355	31.2493	1.96303	96.2945	0.977536
							MYO-Def	0.0820686	0.0305056	0.00603364	0.197224
							BG	0.00166442	0.00162703	-0.000336041	0.00771358
	antlathla	ACSC	Not Included	Hawkeye4	BW O3_0.5	16-2	MYO-Norm	0.189563	0.047508	0.0422971	0.286168	35.819	2.1046	79.3785	0.651866
							MYO-Def	0.0895777	0.0502129	0.00425806	0.248352
							BG	0.00366347	0.00238809	0.000189625	0.0125494
5	antlathla	ACSC	Included	Hawkeye4	BW O3_0.5	2-4	MYO-Norm	0.109435	0.0368903	0.036602	0.194952	29.7867	1.36165	21.1692	0.458187
							MYO-Def	0.0592032	0.0193353	0.0296017	0.152651
							BG	0.0112826	0.00516954	0.00320389	0.0239039
	antlathla	ACSC	Included	Hawkeye4	BW O3_0.5	2-6	MYO-Norm	0.135358	0.0386821	0.0387281	0.219426	30.6818	1.64312	29.2911	0.52368
							MYO-Def	0.0717986	0.022836	0.0279715	0.172647
							BG	0.00882434	0.00462113	0.0024911	0.0237851
	antlathla	ACSC	Included	Hawkeye4	BW O3_0.5	2-8	MYO-Norm	0.150103	0.0368748	0.0353751	0.224634	31.2454	1.93817	37.0237	0.570165
							MYO-Def	0.0786334	0.0250023	0.0241808	0.175682
							BG	0.00711064	0.00405424	0.0018577	0.0220718
	antlathla	ACSC	Included	Hawkeye4	BW O3_0.5	2-16	MYO-Norm	0.179041	0.0382828	0.0283984	0.241746	32.9796	2.31974	60.9636	279.388
							MYO-Def	0.0902348	0.0315163	0.0128035	0.206664
							BG	0.0038302	0.00293685	0.000137024	0.0157781
	antlathla	ACSC	Included	Hawkeye4	BW O3_0.5	2-32	MYO-Norm	0.197516	0.0472925	0.0254836	0.293918	33.6308	2.10218	79.1892	-62.4761
							MYO-Def	0.0980985	0.0380089	0.00439288	0.25744
							BG	0.00222843	0.00249423	-0.00075697	0.0157528
	antlathla	ACSC	Included	Hawkeye4	BW O3_0.5	4-4	MYO-Norm	0.156248	0.0392401	0.0372337	0.238499	30.616	1.86667	36.3621	0.572939
							MYO-Def	0.0829998	0.0263996	0.0260005	0.188805
							BG	0.00749992	0.004297	0.00188631	0.0233397
	antlathla	ACSC	Included	Hawkeye4	BW O3_0.5	4-6	MYO-Norm	0.175429	0.037855	0.0325802	0.241796	31.7381	2.23294	49.3471	0.671199
							MYO-Def	0.090901	0.0297429	0.0189236	0.188735
							BG	0.00529649	0.003555	0.000937154	0.0195514
	antlathla	ACSC	Included	Hawkeye4	BW O3_0.5	4-8	MYO-Norm	0.186825	0.0395104	0.0298678	0.250877	32.3927	2.31386	58.9117	0.778264
							MYO-Def	0.0954036	0.0324424	0.013844	0.211038
							BG	0.0040748	0.00317127	0.000156298	0.0167756
	antlathla	ACSC	Included	Hawkeye4	BW O3_0.5	4-12	MYO-Norm	0.199428	0.0442687	0.0271329	0.282189	32.8771	2.22927	70.3668	0.978579
							MYO-Def	0.100741	0.0363026	0.00781662	0.244404
							BG	0.00289616	0.00283412	-0.000495906	0.0161489
	antlathla	ACSC	Included	Hawkeye4	BW O3_0.5	8-4	MYO-Norm	0.195891	0.042467	0.0306336	0.267487	30.3472	2.14788	60.9372	0.744524
							MYO-Def	0.104677	0.0349259	0.0153246	0.223811
							BG	0.00431771	0.00321464	0.000144817	0.016159
	antlathla	ACSC	Included	Hawkeye4	BW O3_0.5	8-6	MYO-Norm	0.208514	0.0463873	0.0282839	0.297856	30.6495	2.10903	71.0854	0.994595
							MYO-Def	0.110682	0.038839	0.00950958	0.259191
							BG	0.00294923	0.00293329	-0.000656105	0.0150373
	antlathla	ACSC	Included	Hawkeye4	BW O3_0.5	16-2	MYO-Norm	0.260714	0.0604468	0.0570755	0.411346	38.2816	2.38807	84.8482	0.566695
							MYO-Def	0.116363	0.0626068	0.00963045	0.30669
							BG	0.00542216	0.00307271	0.000824127	0.0135448
4	antlathla	ACSC	Not Included	Hawkeye4	BW O3_0.5	2-4	MYO-Norm	0.0664272	0.0230714	0.0236675	0.11914	27.7865	1.25213	20.4281	0.399219
							MYO-Def	0.0375387	0.0125586	0.0198287	0.101906
							BG	0.00814531	0.00325176	0.00218114	0.0155154
	antlathla	ACSC	Not Included	Hawkeye4	BW O3_0.5	2-6	MYO-Norm	0.0912452	0.0285466	0.0283209	0.151866	30.1008	1.47905	29.8747	0.477999
							MYO-Def	0.0490233	0.0161537	0.0207485	0.129309
							BG	0.00638968	0.00305426	0.00172358	0.0145101
	antlathla	ACSC	Not Included	Hawkeye4	BW O3_0.5	2-8	MYO-Norm	0.104796	0.027721	0.0321675	0.162978	30.8429	1.78226	38.7486	0.539833
							MYO-Def	0.05539	0.0179885	0.018781	0.135585
							BG	0.0050099	0.00270451	0.00135432	0.0135237
	antlathla	ACSC	Not Included	Hawkeye4	BW O3_0.5	2-16	MYO-Norm	0.129987	0.0279539	0.0292896	0.176139	32.7246	2.29304	68.2522	97.2905
							MYO-Def	0.0658877	0.0237065	0.0100159	0.157947
							BG	0.00243176	0.00190451	0.000287324	0.0100315
	antlathla	ACSC	Not Included	Hawkeye4	BW O3_0.5	2-32	MYO-Norm	0.145854	0.0356202	0.0264207	0.223166	33.6034	2.05977	107.874	-25.1541
							MYO-Def	0.0724847	0.0291852	0.00268605	0.196096
							BG	0.00111952	0.00135208	-0.00141608	0.00800968
	antlathla	ACSC	Not Included	Hawkeye4	BW O3_0.5	4-4	MYO-Norm	0.107318	0.0291099	0.0318441	0.169487	30.8013	1.73628	38.7312	0.535238
							MYO-Def	0.0567752	0.0186213	0.0191943	0.14236
							BG	0.00517684	0.00277084	0.00141166	0.0138479
	antlathla	ACSC	Not Included	Hawkeye4	BW O3_0.5	4-6	MYO-Norm	0.123571	0.0276739	0.0326328	0.177757	31.9043	2.16006	54.3925	0.654511
							MYO-Def	0.0637936	0.021595	0.014206	0.145402
							BG	0.00347105	0.00227184	0.000824445	0.0114493
	antlathla	ACSC	Not Included	Hawkeye4	BW O3_0.5	4-8	MYO-Norm	0.132951	0.0286218	0.0306974	0.181709	32.6277	2.28547	67.3477	0.780425
							MYO-Def	0.0675366	0.0239621	0.0103162	0.157138
							BG	0.00252952	0.0019741	0.000311238	0.0103615
	antlathla	ACSC	Not Included	Hawkeye4	BW O3_0.5	4-12	MYO-Norm	0.143346	0.0323559	0.0287323	0.20425	33.2491	2.21094	88.3761	1.01716
							MYO-Def	0.071809	0.0271934	0.0054959	0.180714
							BG	0.00159464	0.001622	-0.000229225	0.00907198
	antlathla	ACSC	Not Included	Hawkeye4	BW O3_0.5	8-4	MYO-Norm	0.142862	0.0318995	0.0326226	0.200197	31.1091	2.12529	70.7949	0.753171
							MYO-Def	0.0750664	0.0261679	0.0114762	0.167895
							BG	0.0026793	0.00201797	0.000342163	0.0111447
	antlathla	ACSC	Not Included	Hawkeye4	BW O3_0.5	8-6	MYO-Norm	0.153682	0.0348595	0.0308577	0.221248	31.5517	2.11474	94.2962	1.00159
							MYO-Def	0.0799631	0.029626	0.00631204	0.194128
							BG	0.0016272	0.00162978	-0.00106002	0.00954979
	antlathla	ACSC	Not Included	Hawkeye4	BW O3_0.5	16-2	MYO-Norm	0.187786	0.0449496	0.0633725	0.314085	35.2804	2.17904	79.6791	0.650487
							MYO-Def	0.0898388	0.0509847	0.00417591	0.283876
							BG	0.0036231	0.00235678	0.000461596	0.0147985
4	antlathla	ACSC	Included	Hawkeye4	BW O3_0.5	2-4	MYO-Norm	0.105763	0.0343124	0.0365458	0.182529	29.4156	1.40121	20.628	0.448319
							MYO-Def	0.0576841	0.018578	0.0288395	0.150762
							BG	0.0114364	0.00512716	0.00310145	0.0224106
	antlathla	ACSC	Included	Hawkeye4	BW O3_0.5	2-6	MYO-Norm	0.131792	0.0360622	0.0419819	0.209287	30.7865	1.72054	28.4143	0.518116
							MYO-Def	0.0697456	0.0217906	0.0267708	0.172041
							BG	0.00895209	0.00463822	0.00251143	0.0218333
	antlathla	ACSC	Included	Hawkeye4	BW O3_0.5	2-8	MYO-Norm	0.146876	0.0343797	0.0407762	0.215967	31.6578	2.05453	35.818	0.568569
							MYO-Def	0.0762418	0.023784	0.0220844	0.175988
							BG	0.00721218	0.00410062	0.00200395	0.0199557
	antlathla	ACSC	Included	Hawkeye4	BW O3_0.5	2-16	MYO-Norm	0.176898	0.0366604	0.0336752	0.238929	33.9385	2.44536	58.3027	325.459
							MYO-Def	0.0872501	0.0300895	0.0125737	0.200464
							BG	0.00388967	0.00303413	0.000112642	0.0159805
	antlathla	ACSC	Included	Hawkeye4	BW O3_0.5	2-32	MYO-Norm	0.19621	0.0463552	0.0305871	0.301489	34.8205	2.18641	75.3029	-55.5681
							MYO-Def	0.0948584	0.0363213	0.00504041	0.245858
							BG	0.00228608	0.00260561	-0.000834205	0.0155946
	antlathla	ACSC	Included	Hawkeye4	BW O3_0.5	4-4	MYO-Norm	0.152871	0.0368367	0.0429088	0.229128	30.9661	1.96247	35.1442	0.572078
							MYO-Def	0.0805802	0.0250758	0.0228392	0.190721
							BG	0.00760354	0.00434982	0.00202341	0.0212038
	antlathla	ACSC	Included	Hawkeye4	BW O3_0.5	4-6	MYO-Norm	0.172603	0.0356648	0.0382927	0.233906	32.4204	2.36975	47.3319	0.67905
							MYO-Def	0.0880865	0.0283321	0.0167109	0.191171
							BG	0.00537022	0.00364665	0.000875227	0.0176032
	antlathla	ACSC	Included	Hawkeye4	BW O3_0.5	4-8	MYO-Norm	0.184423	0.0376263	0.0355821	0.249822	33.2621	2.44679	56.1976	0.793204
							MYO-Def	0.0923593	0.0309965	0.0129375	0.20377
							BG	0.00413726	0.00328169	8.9152e-05	0.0166513
	antlathla	ACSC	Included	Hawkeye4	BW O3_0.5	4-12	MYO-Norm	0.197546	0.0427669	0.03278	0.29158	33.921	2.33997	66.7667	1.00053
							MYO-Def	0.0974728	0.034747	0.008303	0.230067
							BG	0.00295718	0.00295875	-0.000627275	0.0161667
	antlathla	ACSC	Included	Hawkeye4	BW O3_0.5	8-4	MYO-Norm	0.194061	0.0400967	0.0370936	0.264968	31.1347	2.29819	58.2385	0.757791
							MYO-Def	0.101911	0.0333882	0.012775	0.214796
							BG	0.00439723	0.00333218	0.000226768	0.0171374
	antlathla	ACSC	Included	Hawkeye4	BW O3_0.5	8-6	MYO-Norm	0.207231	0.0440638	0.0348324	0.305323	31.5974	2.25843	67.342	1.01408
							MYO-Def	0.107716	0.03731	0.00831562	0.243614
							BG	0.00303456	0.00307729	-0.00059	0.0166627
	antlathla	ACSC	Included	Hawkeye4	BW O3_0.5	16-2	MYO-Norm	0.261456	0.0601834	0.0657555	0.40101	38.4086	2.41111	81.5335	0.579326
							MYO-Def	0.116347	0.0631555	0.0104258	0.33608
							BG	0.00553528	0.00320673	0.000841524	0.0151729
3	antlathla	ACSC	Not Included	Hawkeye4	BW O3_0.5	2-4	MYO-Norm	0.0582815	0.0196779	0.024249	0.100257	27.3669	1.27277	22.5124	0.348288
							MYO-Def	0.033236	0.0105948	0.0191721	0.0838998
							BG	0.0074331	0.00258886	0.00197323	0.0135275
	antlathla	ACSC	Not Included	Hawkeye4	BW O3_0.5	2-6	MYO-Norm	0.0805597	0.025	0.023078	0.129398	29.7454	1.47753	31.9028	0.434499
							MYO-Def	0.0436215	0.0136435	0.0213726	0.107358
							BG	0.00581166	0.00252516	0.00166992	0.0125345
	antlathla	ACSC	Not Included	Hawkeye4	BW O3_0.5	2-8	MYO-Norm	0.0931451	0.0245804	0.0203411	0.138847	30.4164	1.76757	40.4819	0.503065
							MYO-Def	0.0496975	0.0151888	0.0208382	0.114695
							BG	0.00457378	0.00230091	0.00128884	0.0112526
	antlathla	ACSC	Not Included	Hawkeye4	BW O3_0.5	2-16	MYO-Norm	0.117622	0.0251291	0.0139498	0.166076	32.2212	2.2813	66.4862	66.0711
							MYO-Def	0.060295	0.0200474	0.0153498	0.149027
							BG	0.00231841	0.00176912	0.000380334	0.0085408
	antlathla	ACSC	Not Included	Hawkeye4	BW O3_0.5	2-32	MYO-Norm	0.133584	0.0326471	0.00937564	0.213376	33.0808	2.03423	95.6947	-98.0694
							MYO-Def	0.0671723	0.0245783	0.00977524	0.189408
							BG	0.00117478	0.00139594	-0.000332898	0.00688615
	antlathla	ACSC	Not Included	Hawkeye4	BW O3_0.5	4-4	MYO-Norm	0.0954426	0.0257976	0.0208314	0.144456	30.4811	1.72853	40.1881	0.503426
							MYO-Def	0.0508508	0.015718	0.0213216	0.119946
							BG	0.00471748	0.0023749	0.00132306	0.0116066
	antlathla	ACSC	Not Included	Hawkeye4	BW O3_0.5	4-6	MYO-Norm	0.111062	0.0246373	0.0167984	0.153256	31.4942	2.15936	54.4261	0.633434
							MYO-Def	0.0578611	0.01825	0.0183793	0.128201
							BG	0.00322149	0.0020406	0.000774848	0.00982662
	antlathla	ACSC	Not Included	Hawkeye4	BW O3_0.5	4-8	MYO-Norm	0.120338	0.025641	0.0143376	0.168535	32.2149	2.28704	65.4527	0.764801
							MYO-Def	0.061696	0.0202487	0.0156515	0.148488
							BG	0.00240396	0.00183855	0.000382612	0.00884714
	antlathla	ACSC	Not Included	Hawkeye4	BW O3_0.5	4-12	MYO-Norm	0.130774	0.0293762	0.0114189	0.193729	32.8476	2.20143	81.9566	1.00336
							MYO-Def	0.0661043	0.0229004	0.0119911	0.173361
							BG	0.0015903	0.00159565	-0.000160637	0.00775479
	antlathla	ACSC	Not Included	Hawkeye4	BW O3_0.5	8-4	MYO-Norm	0.129173	0.0284806	0.0148458	0.182074	30.361	2.11262	69.9223	0.723855
							MYO-Def	0.0690044	0.0219779	0.0175181	0.157193
							BG	0.00255214	0.00184738	0.00042957	0.00965315
	antlathla	ACSC	Not Included	Hawkeye4	BW O3_0.5	8-6	MYO-Norm	0.140059	0.0312819	0.0118549	0.208403	30.8518	2.11129	88.0503	0.968539
							MYO-Def	0.0740137	0.02465	0.0136693	0.184452
							BG	0.00164234	0.00159067	-0.000104591	0.00835329
	antlathla	ACSC	Not Included	Hawkeye4	BW O3_0.5	16-2	MYO-Norm	0.173836	0.0400363	0.0297813	0.281228	34.5366	2.22923	77.2683	0.62014
							MYO-Def	0.0845858	0.0474588	0.00821357	0.255781
							BG	0.00362784	0.00224977	0.000730104	0.0117127
3	antlathla	ACSC	Included	Hawkeye4	BW O3_0.5	2-4	MYO-Norm	0.0945441	0.0299383	0.0291746	0.158064	28.995	1.41967	22.5966	0.396655
							MYO-Def	0.0520416	0.016488	0.0280051	0.126664
							BG	0.0105482	0.004184	0.00296837	0.0185546
	antlathla	ACSC	Included	Hawkeye4	BW O3_0.5	2-6	MYO-Norm	0.118499	0.0318581	0.0247779	0.18194	30.3795	1.73339	31.035	0.461738
							MYO-Def	0.0632765	0.0194296	0.0281273	0.147415
							BG	0.00826928	0.00381824	0.00239777	0.0167083
	antlathla	ACSC	Included	Hawkeye4	BW O3_0.5	2-8	MYO-Norm	0.132871	0.0305041	0.0206619	0.186157	31.2569	2.07456	38.8805	0.508992
							MYO-Def	0.0695885	0.0210343	0.0260182	0.154054
							BG	0.0067141	0.00341742	0.00190463	0.0150137
	antlathla	ACSC	Included	Hawkeye4	BW O3_0.5	2-16	MYO-Norm	0.162828	0.0335775	0.012025	0.229433	33.6922	2.44418	58.8196	133.749
							MYO-Def	0.0807584	0.026073	0.0178896	0.187288
							BG	0.00379844	0.00276826	0.000251049	0.0112295
	antlathla	ACSC	Included	Hawkeye4	BW O3_0.5	2-32	MYO-Norm	0.182835	0.0439105	0.00528023	0.272362	34.6139	2.14132	67.5044	-81.0208
							MYO-Def	0.0888085	0.0313443	0.01005	0.231909
							BG	0.00252558	0.00270849	-0.000541966	0.0115223
	antlathla	ACSC	Included	Hawkeye4	BW O3_0.5	4-4	MYO-Norm	0.137845	0.0324513	0.0212363	0.199407	30.5541	1.98824	37.9313	0.516234
							MYO-Def	0.0733241	0.0222877	0.0275253	0.165139
							BG	0.00703958	0.00363407	0.00195301	0.0160016
	antlathla	ACSC	Included	Hawkeye4	BW O3_0.5	4-6	MYO-Norm	0.157114	0.0316597	0.0158207	0.214064	32.0533	2.40914	49.5315	0.625278
							MYO-Def	0.0808414	0.0247789	0.0223792	0.170615
							BG	0.00507294	0.003172	0.000927425	0.0133798
	antlathla	ACSC	Included	Hawkeye4	BW O3_0.5	4-8	MYO-Norm	0.169031	0.0339881	0.0124094	0.235339	32.9754	2.46654	56.7918	0.744136
							MYO-Def	0.0851979	0.02686	0.0185033	0.189087
							BG	0.00399971	0.00297633	0.000248503	0.0119664
	antlathla	ACSC	Included	Hawkeye4	BW O3_0.5	4-12	MYO-Norm	0.182526	0.0396454	0.00815855	0.260986	33.7092	2.32139	63.7031	0.951124
							MYO-Def	0.0904934	0.0298774	0.0135971	0.217898
							BG	0.0030125	0.00286526	-0.000309951	0.0118695
	antlathla	ACSC	Included	Hawkeye4	BW O3_0.5	8-4	MYO-Norm	0.176989	0.0349649	0.0123285	0.240736	29.9753	2.33478	58.6196	0.701731
							MYO-Def	0.0953536	0.0288384	0.0194588	0.20023
							BG	0.00430262	0.00301928	0.000194827	0.0128893
	antlathla	ACSC	Included	Hawkeye4	BW O3_0.5	8-6	MYO-Norm	0.190731	0.039512	0.00818639	0.267462	30.6171	2.26301	62.513	0.956484
							MYO-Def	0.101315	0.0317426	0.0142219	0.230268
							BG	0.00318987	0.00305106	-0.000381344	0.0133748
	antlathla	ACSC	Included	Hawkeye4	BW O3_0.5	16-2	MYO-Norm	0.245448	0.0558741	0.0261185	0.401254	37.3935	2.39116	74.5487	0.563997
							MYO-Def	0.111844	0.0620679	0.0137885	0.307031
							BG	0.00583771	0.00329245	0.000442473	0.0162748
2	antlathla	ACSC	Not Included	Hawkeye4	BW O3_0.5	2-4	MYO-Norm	0.0479197	0.0162364	0.0198304	0.0822598	26.2801	1.22842	19.6296	0.31364
							MYO-Def	0.0279746	0.00851315	0.0160901	0.0647784
							BG	0.00778345	0.0024412	0.00211286	0.0137686
	antlathla	ACSC	Not Included	Hawkeye4	BW O3_0.5	2-6	MYO-Norm	0.0664345	0.021162	0.0239842	0.107776	28.852	1.40589	25.5119	0.405342
							MYO-Def	0.036683	0.0111664	0.019379	0.0839436
							BG	0.00642435	0.00260406	0.0017022	0.0145317
	antlathla	ACSC	Not Included	Hawkeye4	BW O3_0.5	2-8	MYO-Norm	0.0775093	0.0212278	0.0262562	0.113834	29.6577	1.67039	30.6889	0.478686
							MYO-Def	0.0420506	0.0126514	0.0212532	0.0903696
							BG	0.00527621	0.00252565	0.00132843	0.0142307
	antlathla	ACSC	Not Included	Hawkeye4	BW O3_0.5	2-16	MYO-Norm	0.101201	0.0212636	0.0206739	0.150619	32.1325	2.3148	47.0827	74.21
							MYO-Def	0.0519801	0.0174718	0.0154159	0.113855
							BG	0.00302031	0.00214943	0.000286533	0.0127763
	antlathla	ACSC	Not Included	Hawkeye4	BW O3_0.5	2-32	MYO-Norm	0.11775	0.0275919	0.0167274	0.178801	33.7133	2.15197	64.246	-86.3364
							MYO-Def	0.0583731	0.0221199	0.00763473	0.151284
							BG	0.00178951	0.0018328	-0.000319586	0.0115662
	antlathla	ACSC	Not Included	Hawkeye4	BW O3_0.5	4-4	MYO-Norm	0.0795588	0.0223108	0.0262052	0.118881	29.9392	1.64325	30.7772	0.4762
							MYO-Def	0.0428966	0.0131106	0.0215956	0.0951243
							BG	0.00542837	0.00258499	0.00136234	0.0146008
	antlathla	ACSC	Not Included	Hawkeye4	BW O3_0.5	4-6	MYO-Norm	0.0942926	0.0212387	0.0230966	0.137621	31.2528	2.11427	39.7837	0.598199
							MYO-Def	0.0493883	0.0156346	0.0194072	0.100778
							BG	0.00396211	0.00237013	0.00076297	0.0137362
	antlathla	ACSC	Not Included	Hawkeye4	BW O3_0.5	4-8	MYO-Norm	0.103617	0.0217026	0.0210367	0.153057	32.3074	2.33167	46.7892	0.709303
							MYO-Def	0.0530137	0.0176865	0.0161005	0.114433
							BG	0.00312215	0.00221455	0.000296026	0.013092
	antlathla	ACSC	Not Included	Hawkeye4	BW O3_0.5	4-12	MYO-Norm	0.114392	0.0246472	0.0186344	0.170937	33.4028	2.32421	56.7415	0.892989
							MYO-Def	0.0571067	0.0204438	0.0112183	0.137428
							BG	0.00225761	0.00201602	-0.000192078	0.0123002
	antlathla	ACSC	Not Included	Hawkeye4	BW O3_0.5	8-4	MYO-Norm	0.110987	0.0244845	0.0219375	0.162794	30.2782	2.10702	49.616	0.688417
							MYO-Def	0.0593976	0.0186345	0.0182596	0.118277
							BG	0.00324937	0.00223692	0.000252048	0.0143466
	antlathla	ACSC	Not Included	Hawkeye4	BW O3_0.5	8-6	MYO-Norm	0.122191	0.0262008	0.0196038	0.181592	31.2349	2.21996	60.6142	0.88166
							MYO-Def	0.0640262	0.021255	0.0133761	0.142015
							BG	0.00228646	0.00201588	-0.000251186	0.0130975
	antlathla	ACSC	Not Included	Hawkeye4	BW O3_0.5	16-2	MYO-Norm	0.154387	0.034499	0.0391309	0.236004	35.3505	2.3376	55.1538	0.60193
							MYO-Def	0.0737422	0.0433905	0.00787843	0.204458
							BG	0.00465039	0.00279921	0.00064227	0.0160637
2	antlathla	ACSC	Included	Hawkeye4	BW O3_0.5	2-4	MYO-Norm	0.0785707	0.0248062	0.031842	0.126652	27.8226	1.37886	19.042	0.364381
							MYO-Def	0.0443664	0.0128165	0.0274089	0.098927
							BG	0.0113238	0.00412618	0.00302536	0.0197503
	antlathla	ACSC	Included	Hawkeye4	BW O3_0.5	2-6	MYO-Norm	0.0992519	0.0275398	0.0312941	0.145334	29.3651	1.63615	23.9238	0.443259
							MYO-Def	0.0541927	0.0156788	0.0289747	0.115862
							BG	0.00935944	0.00414866	0.00240168	0.0194144
	antlathla	ACSC	Included	Hawkeye4	BW O3_0.5	2-8	MYO-Norm	0.112348	0.0269227	0.027565	0.156799	30.3484	1.94315	28.303	0.501005
							MYO-Def	0.0600331	0.0174537	0.026377	0.121229
							BG	0.00792302	0.00396947	0.00183893	0.0184941
	antlathla	ACSC	Included	Hawkeye4	BW O3_0.5	2-16	MYO-Norm	0.141905	0.0291082	0.0190246	0.210449	33.4008	2.44124	38.8572	57.5845
							MYO-Def	0.0708448	0.0228895	0.0183808	0.143899
							BG	0.005081	0.00365196	0.000505487	0.0157134
	antlathla	ACSC	Included	Hawkeye4	BW O3_0.5	2-32	MYO-Norm	0.162729	0.0382183	0.0115027	0.24656	34.8351	2.20007	41.4533	-89.6781
							MYO-Def	0.0786459	0.0283829	0.00881212	0.188067
							BG	0.00388963	0.0039256	-0.000426172	0.0147355
	antlathla	ACSC	Included	Hawkeye4	BW O3_0.5	4-4	MYO-Norm	0.116148	0.0283682	0.0286205	0.160867	29.81	1.88046	27.7799	0.506991
							MYO-Def	0.0628028	0.0184787	0.0272127	0.130523
							BG	0.00824671	0.00418101	0.00186771	0.0192621
	antlathla	ACSC	Included	Hawkeye4	BW O3_0.5	4-6	MYO-Norm	0.13454	0.0276213	0.0235022	0.195899	31.5638	2.33717	34.0151	0.619981
							MYO-Def	0.0699844	0.0212621	0.0222379	0.134651
							BG	0.00637971	0.0039553	0.00117781	0.0176897
	antlathla	ACSC	Included	Hawkeye4	BW O3_0.5	4-8	MYO-Norm	0.146514	0.0293344	0.020118	0.216697	32.7802	2.46609	37.5779	0.730308
							MYO-Def	0.0741726	0.0235265	0.0191643	0.146807
							BG	0.00533876	0.00389894	0.000455899	0.0166594
	antlathla	ACSC	Included	Hawkeye4	BW O3_0.5	4-12	MYO-Norm	0.160401	0.0342297	0.0156586	0.23872	33.8822	2.37182	40.0671	0.907615
							MYO-Def	0.0792142	0.0267269	0.0133506	0.175748
							BG	0.0044108	0.00400331	-0.000246941	0.015651
	antlathla	ACSC	Included	Hawkeye4	BW O3_0.5	8-4	MYO-Norm	0.15316	0.0296936	0.0208292	0.220306	29.3322	2.33965	38.1799	0.718485
							MYO-Def	0.0836875	0.0242488	0.0206622	0.152828
							BG	0.00558332	0.00401153	0.000426246	0.0168348
	antlathla	ACSC	Included	Hawkeye4	BW O3_0.5	8-6	MYO-Norm	0.167316	0.0330347	0.0164908	0.242323	30.339	2.35789	39.0022	0.938662
							MYO-Def	0.0894238	0.0272928	0.016492	0.18328
							BG	0.00457024	0.00428991	-0.000316702	0.0158225
	antlathla	ACSC	Included	Hawkeye4	BW O3_0.5	16-2	MYO-Norm	0.220631	0.0485812	0.0489404	0.350257	37.6315	2.48349	45.5274	0.59729
							MYO-Def	0.0999801	0.0547477	0.0118584	0.255314
							BG	0.0081135	0.00484611	0.000612155	0.0232671
1	antlathla	ACSC	Not Included	Hawkeye4	BW O3_0.5	2-4	MYO-Norm	0.0344474	0.0114103	0.0154763	0.0552346	24.3454	1.18216	16.3281	0.265677
							MYO-Def	0.0209586	0.00661904	0.0113927	0.049201
							BG	0.00794084	0.0021097	0.00248046	0.013495
	antlathla	ACSC	Not Included	Hawkeye4	BW O3_0.5	2-6	MYO-Norm	0.0474382	0.0164353	0.0181906	0.0747637	27.2356	1.23569	18.7829	0.35436
							MYO-Def	0.0271293	0.00895468	0.0130591	0.0651106
							BG	0.00712721	0.0025256	0.00219471	0.0143128
	antlathla	ACSC	Not Included	Hawkeye4	BW O3_0.5	2-8	MYO-Norm	0.0555312	0.0182625	0.0178197	0.0898772	28.1793	1.33696	20.7242	0.428602
							MYO-Def	0.0311149	0.010212	0.0139522	0.0722164
							BG	0.00625179	0.00267953	0.00163685	0.0141824
	antlathla	ACSC	Not Included	Hawkeye4	BW O3_0.5	2-16	MYO-Norm	0.0743898	0.0209304	0.0135839	0.123916	30.5501	1.66342	27.6223	34.1453
							MYO-Def	0.0395738	0.0137656	0.0106832	0.0865184
							BG	0.00422672	0.00269311	0.00061298	0.0137901
	antlathla	ACSC	Not Included	Hawkeye4	BW O3_0.5	2-32	MYO-Norm	0.0893873	0.0249986	0.00915066	0.149961	32.1474	1.73971	34.295	-201.82
							MYO-Def	0.0458969	0.0171745	0.00653518	0.102394
							BG	0.00282712	0.00260642	-0.000123866	0.0131849
	antlathla	ACSC	Not Included	Hawkeye4	BW O3_0.5	4-4	MYO-Norm	0.0570505	0.0191579	0.0182349	0.091789	28.5796	1.32381	20.8632	0.427106
							MYO-Def	0.0316891	0.0106287	0.0141473	0.0755266
							BG	0.00640242	0.00273451	0.00170394	0.0143801
	antlathla	ACSC	Not Included	Hawkeye4	BW O3_0.5	4-6	MYO-Norm	0.0684223	0.0205975	0.0157989	0.112959	29.8359	1.52671	24.5832	0.540506
							MYO-Def	0.0369758	0.0125319	0.0127277	0.0841824
							BG	0.00514942	0.00278329	0.00106475	0.0140852
	antlathla	ACSC	Not Included	Hawkeye4	BW O3_0.5	4-8	MYO-Norm	0.0762235	0.0214788	0.0139524	0.126349	30.8402	1.67296	27.5951	0.636121
							MYO-Def	0.0402904	0.0140597	0.0107007	0.0901189
							BG	0.00434227	0.00276221	0.00062528	0.013928
	antlathla	ACSC	Not Included	Hawkeye4	BW O3_0.5	4-12	MYO-Norm	0.0859006	0.0233543	0.0112998	0.143006	31.9687	1.78202	31.6041	0.797464
							MYO-Def	0.0442827	0.0161144	0.00811116	0.0973366
							BG	0.00340833	0.00271802	0.000123286	0.0136295
	antlathla	ACSC	Not Included	Hawkeye4	BW O3_0.5	8-4	MYO-Norm	0.0815592	0.0242111	0.0142644	0.133254	28.7228	1.50335	28.3765	0.646392
							MYO-Def	0.0451615	0.0147399	0.0117082	0.103459
							BG	0.0044465	0.00287418	0.000675918	0.0147274
	antlathla	ACSC	Not Included	Hawkeye4	BW O3_0.5	8-6	MYO-Norm	0.0915051	0.0253851	0.0117389	0.150294	29.617	1.64731	32.7309	0.820769
							MYO-Def	0.0496879	0.0162616	0.00895248	0.111749
							BG	0.00340617	0.00279568	0.000137007	0.0142214
	antlathla	ACSC	Not Included	Hawkeye4	BW O3_0.5	16-2	MYO-Norm	0.120525	0.0277534	0.0291081	0.216432	34.6402	2.23458	31.6895	0.600331
							MYO-Def	0.0585077	0.036454	0.00749137	0.191322
							BG	0.00633536	0.00380331	0.000951827	0.0207378
1	antlathla	ACSC	Included	Hawkeye4	BW O3_0.5	2-4	MYO-Norm	0.0572488	0.0187087	0.0239776	0.0890426	26.2434	1.27223	16.6389	0.298023
							MYO-Def	0.0334471	0.00972558	0.0186853	0.0737385
							BG	0.011545	0.00344067	0.00328718	0.0201439
	antlathla	ACSC	Included	Hawkeye4	BW O3_0.5	2-6	MYO-Norm	0.0723482	0.0236655	0.0219237	0.119726	28.3147	1.3492	18.8593	0.377736
							MYO-Def	0.0404186	0.0124327	0.0202328	0.089808
							BG	0.0101558	0.00383621	0.00272118	0.0204562
	antlathla	ACSC	Included	Hawkeye4	BW O3_0.5	2-8	MYO-Norm	0.082386	0.0256534	0.0196385	0.13879	29.6077	1.46728	21.1079	0.4331
							MYO-Def	0.0447453	0.0141279	0.0182445	0.0973949
							BG	0.00901198	0.00390309	0.00231852	0.0203343
	antlathla	ACSC	Included	Hawkeye4	BW O3_0.5	2-16	MYO-Norm	0.107658	0.0300879	0.0137269	0.181247	33.5778	1.79888	27.468	43.3422
							MYO-Def	0.0535335	0.0185038	0.0119848	0.110839
							BG	0.00645089	0.0039194	0.000694194	0.0202246
	antlathla	ACSC	Included	Hawkeye4	BW O3_0.5	2-32	MYO-Norm	0.12775	0.0375004	0.00801684	0.21004	35.7809	1.79543	28.5972	-71.562
							MYO-Def	0.0604208	0.0224653	0.00728428	0.127414
							BG	0.00513233	0.00446722	-0.000524027	0.020464
	antlathla	ACSC	Included	Hawkeye4	BW O3_0.5	4-4	MYO-Norm	0.0845377	0.0262514	0.0201612	0.141473	29.1956	1.45545	21.3501	0.43212
							MYO-Def	0.0463301	0.0149791	0.0185496	0.103088
							BG	0.00916319	0.0039596	0.00232086	0.0206257
	antlathla	ACSC	Included	Hawkeye4	BW O3_0.5	4-6	MYO-Norm	0.0995214	0.0282092	0.0168615	0.168078	31.4006	1.68615	25.1059	0.524459
							MYO-Def	0.0519564	0.0174118	0.0146245	0.112271
							BG	0.00755838	0.00396406	0.00145377	0.0204717
	antlathla	ACSC	Included	Hawkeye4	BW O3_0.5	4-8	MYO-Norm	0.110172	0.030101	0.0144865	0.18416	33.0322	1.81761	27.3746	0.611537
							MYO-Def	0.0554601	0.0191991	0.0121874	0.117599
							BG	0.00658112	0.0040246	0.000605989	0.0205041
	antlathla	ACSC	Included	Hawkeye4	BW O3_0.5	4-12	MYO-Norm	0.123314	0.0341056	0.0111816	0.202507	34.6773	1.86195	28.692	0.764103
							MYO-Def	0.0598112	0.0215551	0.00913758	0.123051
							BG	0.00562471	0.00429786	-0.000219799	0.0206942
	antlathla	ACSC	Included	Hawkeye4	BW O3_0.5	8-4	MYO-Norm	0.117456	0.0312539	0.0155382	0.188957	28.958	1.6878	26.9873	0.63149
							MYO-Def	0.0647056	0.0191055	0.0131252	0.134993
							BG	0.00689206	0.00435227	0.000651229	0.0225697
	antlathla	ACSC	Included	Hawkeye4	BW O3_0.5	8-6	MYO-Norm	0.131063	0.0343374	0.0123949	0.207464	30.3189	1.77603	27.3081	0.830241
							MYO-Def	0.0700789	0.0207683	0.00990916	0.141903
							BG	0.00578074	0.00479941	-0.000244551	0.0229387
	antlathla	ACSC	Included	Hawkeye4	BW O3_0.5	16-2	MYO-Norm	0.179594	0.0370424	0.0461012	0.272056	38.4823	2.69457	30.5905	0.556895
							MYO-Def	0.0797807	0.043042	0.0152682	0.220638
							BG	0.0105422	0.0058709	0.00113704	0.0334169
